# Supplementary material for: The Plasmodesmal Protein PDLP1 Localises to Haustoria-Associated Membranes during Downy Mildew Infection and Regulates Callose Deposition
Source: PLoS Pathog. 2014 Nov 13;10(11):e1004496. doi: 10.1371/journal.ppat.1004496 (PMC4231120; doi:10.1371/journal.ppat.1004496)
Supplement: Table S1 — Peptides identified by MS/MS. Total spectrum counts and mascot ion score for each peptide detected in control and experimental samples. (XLSX) [file ppat.1004496.s008.xlsx]

## Sheet: Sheet1
		Treatment =	control										control Max of Mascot Ion score	control Count of Spectrum name	PDLP1										PDLP1 Max of Mascot Ion score	PDLP1 Count of Spectrum name	PDLP1 inf								PDLP1 inf Max of Mascot Ion score	PDLP1 inf Count of Spectrum name	Total Max of Mascot Ion score	Total Count of Spectrum name
		MS file name =	PDLP1_C_2_1_120416 (F062447)		PDLP1_C_3_1_120415 (F062452)		PDLP1_Col_4_1_120607 (F062457)		PDLP1_GH_5_1_130209 (F062451)		PDLP1_wt-t_1_1_111206 (F062455)		TOTAL scores	SUM SC	PDLP1_lp-t_1_1_111206 (F062445)		PDLP1_P_2_1_120416 (F062458)		PDLP1_P_3_1_120415 (F062454)		PDLP1_P_5_1_130209 (F062459)		PDLP1_PDLP1noinf_4_1_120607 (F062460)		TOTAL scores	SUM SC	PDLP1_H_2_1_120416 (F062453)		PDLP1_H_3_1_120415 (F062456)		PDLP1_PDLP1inf_4_1_120607 (F062449)		PDLP1_PH_5_1_130209 (F062448)		TOTAL scores	SUM SC
Protein accession numbers	Protein name	Peptide sequence	Max of Mascot Ion score	Count of Spectrum name	Max of Mascot Ion score	Count of Spectrum name	Max of Mascot Ion score	Count of Spectrum name	Max of Mascot Ion score	Count of Spectrum name	Max of Mascot Ion score	Count of Spectrum name			Max of Mascot Ion score	Count of Spectrum name	Max of Mascot Ion score	Count of Spectrum name	Max of Mascot Ion score	Count of Spectrum name	Max of Mascot Ion score	Count of Spectrum name	Max of Mascot Ion score	Count of Spectrum name			Max of Mascot Ion score	Count of Spectrum name	Max of Mascot Ion score	Count of Spectrum name	Max of Mascot Ion score	Count of Spectrum name	Max of Mascot Ion score	Count of Spectrum name
AT1G01090.1	PDH-E1 ALPHA pyruvate dehydrogenase E1 alpha chr1:47705-49166 REVERSE LENGTH=428	SQLLENVFADPK															25.9	1							25.9	1											25.9	1
		YAARDPIAALKK															18.7	1							18.7	1											18.7	1
AT1G02560.1	CLPP5, NCLPP5, NCLPP1 nuclear encoded CLP protease 5 chr1:538000-539805 FORWARD LENGTH=298	EAKEYGLIDGVImNPLK	23.2	1									23.2	1																							23.2	1
		FQSIISQLFQYR	29.6	1									29.6	1																							29.6	1
AT1G02920.1,AT1G02930.1,AT1G02930.2	ATGSTF7, GST11, ATGSTF8, GSTF7, ATGST11 glutathione S-transferase 7 chr1:658886-659705 REVERSE LENGTH=209	VFGHPASTATRR	18.2	1									18.2	1																							18.2	1
		VLDVYEHR																													44.5	1			44.5	1	44.5	1
		VLIALHEK	33.8	1									33.8	1																							33.8	1
		VPAFEDGDFKLFESR	39	2									39	2									28.2	1	28.2	1					33.7	1			33.7	1	39	4
AT1G03220.1,AT1G03230.1	Eukaryotic aspartyl protease family protein chr1:787143-788444 FORWARD LENGTH=433	FGFSSTLLGR													61.4	1									61.4	1											61.4	1
		TPLVPASVVFDLGGR													49.8	1									49.8	1											49.8	1
AT1G03630.1,AT1G03630.2	POR C, PORC protochlorophyllide oxidoreductase C chr1:907699-909245 FORWARD LENGTH=401	GYVSEEEAGKR					38.7	1					38.7	1									23.1	1	23.1	1											38.7	2
		LAQVVSDPSLGK					29.9	1					29.9	1			41.7	1	36.6	1					41.7	2			35.9	1					35.9	1	41.7	4
AT1G04410.1	Lactate/malate dehydrogenase family protein chr1:1189418-1191267 REVERSE LENGTH=332	ALGQISER															41.5	1							41.5	1											41.5	1
		mELIDAAFPLLK													37.5	1	33.3	1							37.5	2											37.5	2
		SQAAALEKHAAPNcK					20.9	1					20.9	1																							20.9	1
		VLVVANPANTNALILK	79.2	2			59	1					79.2	3	81.2	2							23.2	1	81.2	3	64.9	2			36.1	1			64.9	3	81.2	9
		VQTSSGEKPVR													57.2	2							38.4	1	57.2	3											57.2	3
AT1G04480.1,AT2G33370.1,AT3G04400.1	Ribosomal protein L14p/L23e family protein chr1:1216110-1217257 FORWARD LENGTH=140	GRGGTSGNKFR	22	1									22	1																	27.8	1			27.8	1	27.8	2
		KGKPDLRK	20.9	1									20.9	1																							20.9	1
AT1G04750.1,AT1G04750.2,AT2G33120.1,AT2G33120.2	VAMP7B, VAMP721, ATVAMP721, AT VAMP7B vesicle-associated membrane protein 721 chr1:1331857-1333426 REVERSE LENGTH=219	AATAQANSLNKEFGSK													34.3	1							51	3	51	4					78.8	2			78.8	2	78.8	6
		SQAQDFR																	29.9	1					29.9	1			28.9	1					28.9	1	29.9	2
		VKEDFNKR	24.1	1									24.1	1	30.4	1	28	3	24.5	1			28.4	1	30.4	6					28.8	1			28.8	1	30.4	8
AT1G04820.1,AT1G50010.1	TUA4, TOR2 tubulin alpha-4 chain chr1:1356421-1358266 REVERSE LENGTH=450	AVFVDLEPTVIDEVR			62.3	2							62.3	2	70.7	3	85.7	2	60.9	2	33.5	1	82.7	2	85.7	10	80.2	2	58.2	2			88.9	1	88.9	5	88.9	17
		AVFVDLEPTVIDEVRTGTYR																									26.1	1							26.1	1	26.1	1
		DVNAAVGTIK	46.1	1									46.1	1					30.5	2					30.5	2	38	1							38	1	46.1	4
		DVNAAVGTIKTKR	24.5	1									24.5	1																	26.9	1			26.9	1	26.9	2
		LSVDYGKK																					35.7	1	35.7	1											35.7	1
		QLFHPEQLISGKEDAANNFAR																					43.3	1	43.3	1											43.3	1
		TIQFVDWcPTGFK																					27.1	1	27.1	1											27.1	1
		TVGGGDDAFNTFFSETGAGK					35.5	2					35.5	2			43.7	1					25	1	43.7	2											43.7	4
AT1G06680.1,AT1G06680.2	PSBP-1, OEE2, PSII-P, OE23 photosystem II subunit P-1 chr1:2047940-2049186 FORWARD LENGTH=263	EIEYPGQVLR																									34.4	1							34.4	1	34.4	1
		SITDYGSPEEFLSQVNYLLGK	73.8	2									73.8	2													60.8	1							60.8	1	73.8	3
		TADGDEGGKHQLITATVNGGK	42.2	2			22.4	1					42.2	3																							42.2	3
		TNTDFLPYNGDGFKVQVPAK	25.5	1									25.5	1																							25.5	1
AT1G07320.1,AT1G07320.2,AT1G07320.3,AT1G07320.4	RPL4 ribosomal protein L4 chr1:2249190-2250189 FORWARD LENGTH=282	GGGIKPYSQKK	27.8	3			24.2	1					27.8	4			20.5	1							20.5	1					36.6	1			36.6	1	36.6	6
		RGTASTLTR	28.6	1									28.6	1																							28.6	1
		TKDFLAAMQR													31.4	1									31.4	1											31.4	1
		TLNLFDILNADKLVLTPAAVEFLNAR	41	1									41	1																							41	1
AT1G07660.1,AT1G07820.1,AT1G07820.2,AT2G28740.1,AT3G45930.1,AT3G46320.1,AT3G53730.1,AT5G59690.1,AT5G59970.1	Histone superfamily protein chr1:2369212-2369523 FORWARD LENGTH=103	DAVTYTEHAR													53.2	1									53.2	1											53.2	1
		DNIQGITKPAIR							36.4	2			36.4	2	53.7	1									53.7	1							32.1	1	32.1	1	53.7	4
		DNIQGITKPAIRR							21.5	1			21.5	1																							21.5	1
		IFLENVIR							26.9	1			26.9	1																							26.9	1
		ISGLIYEETR							51.6	1			51.6	1	48.2	1					32.9	1			48.2	2							40.7	1	40.7	1	51.6	4
		ISGLIYEETRGVLK													19	1									19	1											19	1
		VLRDNIQGITKPAIR							41.6	1			41.6	1	47.2	1									47.2	1											47.2	2
AT1G07920.1,AT1G07930.1,AT1G07940.1,AT1G07940.2,AT5G60390.1,AT5G60390.3	GTP binding Elongation factor Tu family protein chr1:2455559-2457001 FORWARD LENGTH=449	DmRQTVAVGVIK													37.8	1									37.8	1											37.8	1
		FAVRDmR																													20.6	1			20.6	1	20.6	1
		FHINIVVIGHVDSGK									53.8	5	53.8	5	50.4	2									50.4	2											53.8	7
		GYVASNSKDDPAK	52.2	3	21.4	1							52.2	4	54.9	2	57.9	2	44.4	1	26.1	1	41.7	1	57.9	7	33.3	1	22.9	1	44.6	1			44.6	3	57.9	14
		IGGIGTVPVGR			58.8	2	31.6	1			72.3	2	72.3	5	57.7	2			51.5	1			70.8	2	70.8	5	80.6	2			57.8	2			80.6	4	80.6	14
		LPLQDVYK																			23.4	1			23.4	1											23.4	1
		mTPTKPmVVETFSEYPPLGR																					46.2	1	46.2	1							27.2	1	27.2	1	46.2	2
		RGYVASNSKDDPAK	28.5	2			58.2	2					58.2	4	27.1	1	43.2	1					40.5	2	43.2	4	21.1	1			37.8	1			37.8	2	58.2	10
		STTTGHLIYK													28.9	1	29.4	1							29.4	2					37.3	1			37.3	1	37.3	3
		SVDKKDPTGAK	20.2	1									20.2	1	41.2	4					28.7	1			41.2	5							32	1	32	1	41.2	7
AT1G08880.1,AT1G54690.1	HTA3, H2AXB, G-H2AX, GAMMA-H2AX gamma histone variant H2AX chr1:20414607-20415206 REVERSE LENGTH=142	AGLQFPVGR	46.4	1					71.4	5			71.4	6							71.2	1			71.2	1							57.3	1	57.3	1	71.4	8
		NKGDIGSASQEF							49.4	1			49.4	1	37.2	1					44.9	1			44.9	2											49.4	3
		SSKAGLQFPVGR							27.1	1			27.1	1																							27.1	1
AT1G09020.1	SNF4, ATSNF4 homolog of yeast sucrose nonfermenting 4 chr1:2900149-2904212 REVERSE LENGTH=487	SNmDVDDVFLR					49.6	1					49.6	1																							49.6	1
		TADPSQEAVPR	37.5	1			43.6	1					43.6	2																	35	1			35	1	43.6	3
AT1G09130.1,AT1G09130.2,AT1G09130.3	ATP-dependent caseinolytic (Clp) protease/crotonase family protein chr1:2940063-2942217 REVERSE LENGTH=330	AmIQQPR	24.8	1									24.8	1					36.5	1					36.5	1											36.5	2
		VPSSGLmPASDVLIR					59.5	2					59.5	2	88.2	1			39	1	30.7	1	49.9	2	88.2	5	49.3	2	69.1	2	94.7	1			94.7	5	94.7	12
AT1G09200.1,AT3G27360.1,AT5G10390.1,AT5G10400.1,AT5G65360.1	Histone superfamily protein chr1:2971722-2972132 REVERSE LENGTH=136	DIQLARR							24.9	1			24.9	1																							24.9	1
		EIAQDFKTDLR													53.1	1									53.1	1											53.1	1
		FRPGTVALR							20.6	1			20.6	1																							20.6	1
		KLPFQR													26.9	1									26.9	1											26.9	1
		STELLIR													39.6	1									39.6	1											39.6	1
AT1G09340.1	CRB, CSP41B, HIP1.3 chloroplast RNA binding chr1:3015473-3018035 FORWARD LENGTH=378	AGGFPEPEIVHYNPK															36.9	2							36.9	2											36.9	2
		EADFTTDDmILSK																					35.1	1	35.1	1	28.9	1							28.9	1	35.1	2
		EAEEVEPILEALPK															32.5	1							32.5	1											32.5	1
		GKLETESLLQSK					37.9	1					37.9	1			46.8	1							46.8	1											46.8	2
		HKGKLETESLLQSK															26.4	1							26.4	1											26.4	1
		QLPGESDQDFADFSSK	43.1	1									43.1	1			77.1	1							77.1	1	32	1							32	1	77.1	3
AT1G11860.1,AT1G11860.2,AT1G11860.3	Glycine cleavage T-protein family chr1:4001801-4003245 FORWARD LENGTH=408	AILEKSEGK																													29.4	1			29.4	1	29.4	1
		AILEKSEGKVR	21.7	1									21.7	1																							21.7	1
		GKPYEGSITK																					32.2	1	32.2	1											32.2	1
		IGEITSGGFSPNLKK					47.2	1					47.2	1									36.9	1	36.9	1											47.2	2
		RVGFFSSGPPAR	24.5	1			47.2	1					47.2	2			28.3	1					48.9	1	48.9	2					40.7	1			40.7	1	48.9	5
		SHSEVHDESGNKIGEITSGGFSPNLKK															48.8	2							48.8	2											48.8	2
		TALYDFHVAHGGK					39.4	1					39.4	1																							39.4	1
		TGYTGEDGFEISVPDEHAVDLAK					71.2	1					71.2	1																							71.2	1
		VGFFSSGPPAR	47.3	1			58.6	1					58.6	2	53.5	2	57.1	2	54.1	2			60.5	1	60.5	7	51.1	2	51.1	1					51.1	3	60.5	12
AT1G12900.1,AT1G12900.3,AT1G12900.4	GAPA-2 glyceraldehyde 3-phosphate dehydrogenase A subunit 2 chr1:4392634-4394283 REVERSE LENGTH=399	AAALNIVPTSTGAAK					98.4	3			102	4	102	7	95.7	3	83	4	70.5	2			69.2	4	95.7	13	83	5	67.1	4	77.4	4	98.2	4	98.2	17	102	37
		ARAAALNIVPTSTGAAK					104	2					104	2	66.2	1	37.3	1					109	3	109	5	42.4	2	60.8	1	102	2	28.5	2	102	7	109	14
		AVALVLPNLK					40.9	1			44.5	1	44.5	2	46	3	80.2	3	72.7	4			76.8	3	80.2	13	73.5	5	76.7	4	80	4	48.8	2	80	15	80.2	30
		AVALVLPNLKGK					60.7	2					60.7	2			49.9	2					51.3	2	51.3	4	44.8	1	55.4	1	47.8	3	36.3	1	55.4	6	60.7	12
		AVALVLPNLKGKLNGIALR					36.7	1					36.7	1																							36.7	1
		DAAEKELK															44.2	2							44.2	2			27	1					27	1	44.2	3
		DSPLDVVVINDTGGVK					30.3	1			59.2	1	59.2	2	60.9	1							37.9	3	60.9	4	67.1	2			33.7	1	62.3	1	67.1	4	67.1	10
		FGIIKGTmTTTHSYTGDQR					33.8	1					33.8	1									39.3	1	39.3	1					22	1	23.3	1	23.3	2	39.3	4
		GTmTTTHSYTGDQR					56.3	2			31.3	2	56.3	4	58.9	5	60.4	4					81.2	3	81.2	12	38.4	3	36.3	2	50.2	4	34.7	3	50.2	12	81.2	28
		KTFAEEVNAAFR					40	1					40	1																							40	1
		LLDASHR													50	2	33.2	1	44.1	2					50	5	44.3	2	24.3	1	32.2	1	52.4	1	52.4	5	52.4	10
		LLDASHRDLRR															20.9	1							20.9	1	20.7	1			20.2	1	21.5	1	21.5	3	21.5	4
		TFAEEVNAAFR													62	2	74	2	43.8	1			59.1	1	74	6	55.8	1	47.5	1	64.5	1			64.5	3	74	9
		VIAWYDNEWGYSQR					26.9	1					26.9	1	83.9	3	78.4	1					78.8	1	83.9	5											83.9	6
		VLDQKFGIIK									27.8	1	27.8	1	49	2	49.3	4	43.4	3			45.9	1	49.3	10	41.3	2	47.4	3	46.3	3			47.4	8	49.3	19
		VLDQKFGIIKGTmTTTHSYTGDQR																					24.4	1	24.4	1											24.4	1
		VPTPNVSVVDLVVQVSK					46.5	1					46.5	1																							46.5	1
		VPTPNVSVVDLVVQVSKK					52.4	1					52.4	1																							52.4	1
		VVDLADIVANNWK					38.5	1					38.5	1	44.3	1	79.9	1					39	2	79.9	4	62.9	2			85.6	5	71.8	1	85.6	8	85.6	13
		YDSTLGIFDADVKPSGDSALSVDGK					24.4	1					24.4	1																							24.4	1
AT1G13270.1	MAP1C, MAP1B methionine aminopeptidase 1B chr1:4544999-4547155 FORWARD LENGTH=369	AAcELAAR	38.6	1	23.4	1							38.6	2																							38.6	2
		ISEHAEKFGYNVVER					45.2	1					45.2	1																							45.2	1
		RNPPLRR	20	1	30.2	1							30.2	2																	21.1	1			21.1	1	30.2	3
AT1G15820.1	LHCB6, CP24 light harvesting complex photosystem II subunit 6 chr1:5446685-5447676 REVERSE LENGTH=258	DGVYEPDFEKLER									32.5	1	32.5	1	57.1	1									57.1	1	37	1			45	1			45	2	57.1	4
		FFDPLGLAGK	75.9	2			39.3	1	45.8	1			75.9	4	52.8	1	76	1	38	1	46.3	1	54.5	1	76	5	77.1	1	59.6	1	72.9	1	45.3	1	77.1	4	77.1	13
		FFDPLGLAGKNR	50	1									50	1																	36.5	1			36.5	1	50	2
		GGGNFLDPEWLDGSLPGDFGFDPLGLGKDPAFLK	33.7	1							43.5	1	43.5	2																							43.5	2
		LAEIKHSR									23.5	1	23.5	1	25.6	1									25.6	1	32.9	1							32.9	1	32.9	3
		LKLAEIK													41.2	1									41.2	1											41.2	1
		NRDGVYEPDFEKLER	52.9	1							50.3	1	52.9	2	45.8	1									45.8	1	49.5	1	38.8	1					49.5	2	52.9	5
		TAENFANYTGDQGYPGGR	96.1	4			47.6	1	52.8	1	96.3	3	96.3	9	107	2	110	1	91.6	3	65.8	1	109	5	110	12	102	3	101	2	79.9	4	71.7	2	102	11	110	32
AT1G17840.1	WBC11, ABCG11, DSO, COF1, ATWBC11 white-brown complex homolog protein 11 chr1:6142870-6145894 FORWARD LENGTH=703	EKAPTEFVGDVSAR																	29.2	1					29.2	1					29.3	1			29.3	1	29.3	2
		STmLDALASR																	22.7	1					22.7	1	32.1	1							32.1	1	32.1	2
AT1G19570.1,AT1G19570.2	DHAR1, ATDHAR1, DHAR5 dehydroascorbate reductase chr1:6773462-6774413 REVERSE LENGTH=213	SHDGPFIAGER													42.9	1									42.9	1											42.9	1
		VSAVDLSLAPK					39.8	1					39.8	1	27.8	1							68.8	1	68.8	2	78.9	1	71.3	1	53.1	1			78.9	3	78.9	6
AT1G20010.1	TUB5 tubulin beta-5 chain chr1:6938033-6940481 REVERSE LENGTH=449	AVLmDLEPGTmDSIR	42.4	1									42.4	1	63.8	2							57.3	2	63.8	4	39.5	3					65.7	2	65.7	5	65.7	10
		EVDEQILNIQNK																					24.9	1	24.9	1											24.9	1
		INVYYNEASGGR	55	1			39	1					55	2	53.6	2									53.6	2							47.2	1	47.2	1	55	5
		LAVNLIPFPR	48.2	1			56.6	2					56.6	3	42.1	1			63.3	4			73.1	2	73.1	7	65.9	2	76.8	3			57.9	2	76.8	7	76.8	17
		LHFFmVGFAPLTSR					24.1	1					24.1	1																							24.1	1
		mmLTFSVFPSPK																									46	1							46	1	46	1
		NSSYFVEWIPNNVK																	25.8	1					25.8	1											25.8	1
		YLTASAIFR																	27.9	1					27.9	1											27.9	1
		YSGDTADLQLER													28.9	1									28.9	1							63.5	1	63.5	1	63.5	2
AT1G20020.1,AT1G20020.2,AT1G20020.3	ATLFNR2, FNR2 ferredoxin-NADP(+)-oxidoreductase 2 chr1:6942851-6944868 FORWARD LENGTH=369	EQANDKGEKmYIQTR	28.7	1									28.7	1																	31.5	1			31.5	1	31.5	2
		KNEEGVIVNR	40.8	2			29.1	1					40.8	3	58.8	1	47	1					65.8	1	65.8	3	29.4	1			58.8	1			58.8	2	65.8	8
		LVYTNDQGETVK													38.1	1	59.8	1							59.8	2											59.8	2
		VSKKNEEGVIVNR													36.7	1									36.7	1	39.3	1							39.3	1	39.3	2
		YRPKEPYTGK	38.8	3									38.8	3			33.5	2							33.5	2	34.7	2							34.7	2	38.8	7
AT1G20200.1	EMB2719, HAP15 PAM domain (PCI/PINT associated module) protein chr1:7001409-7004154 REVERSE LENGTH=488	ALRPYFELTNAVR																					24.5	1	24.5	1											24.5	1
		IGDLELFR																	36.2	1					36.2	1			62.6	1	35.8	1			62.6	2	62.6	3
		LNSENPVADAESIVAK																											28.6	1	43	1			43	2	43	2
AT1G20260.1,AT1G76030.1	ATPase, V1 complex, subunit B protein chr1:7016971-7020290 FORWARD LENGTH=487	DFEENGSmER													42.4	1									42.4	1	35.7	1							35.7	1	42.4	2
		GYPGYmYTDLATIYER													96.2	2									96.2	2											96.2	2
		KFVmQGAYDTR													24.4	1									24.4	1											24.4	1
		SAIGEGmTR	32.6	1									32.6	1			22.4	1							22.4	1											32.6	2
		TPVSLDmLGR													28	1									28	1											28	1
		TVSGVAGPLVILDK													48.1	1									48.1	1											48.1	1
		VTLFLNLANDPTIER													65.5	2									65.5	2											65.5	2
		YQEIVNIR			27	1							27	1																							27	1
AT1G20620.1,AT1G20620.5	CAT3, SEN2, ATCAT3 catalase 3 chr1:7143142-7146193 FORWARD LENGTH=492	APGVQTPVIVR	62.5	2	59.7	1	36.7	1			60.7	1	62.5	5	38.3	2	51.6	2	54.2	3	36.9	1	59.6	1	59.6	9	57.8	2	57	1	57.1	3			57.8	6	62.5	20
		DLHDAIASGNYPEWK																									22.6	1							22.6	1	22.6	1
		EGNFDLVGNNTPVFFIR															35.1	1					41.4	1	41.4	2											41.4	2
		ENNFKQAGDRYR	21.5	1									21.5	1									21.1	1	21.1	1											21.5	2
		ERIPER																									30.1	2							30.1	2	30.1	2
		ERIPERVVHAR					19.2	1					19.2	1																							19.2	1
		FSTVVHER	43.8	2	26.2	1	52.4	1			28.3	1	52.4	5	20.8	1	42.3	1	21.6	1					42.3	3	20	1			45	1			45	2	52.4	10
		HRLGPNYLQLPVNAPK					38.5	1					38.5	1			24.8	1					29.4	1	29.4	2					19.4	1			19.4	1	38.5	4
		IFAYGDTQR	43	1	45.9	1			37.5	2	40.4	2	45.9	6	34.2	1	57.8	2							57.8	3	51.1	1	47.8	1	41.8	1	41.5	1	51.1	4	57.8	13
		LFIQTmDPADEDKFDFDPLDVTKIWPEDILPLQPVGR									33	1	33	1																							33	1
		LGPNYLQLPVNAPK	86.4	2	93.1	1	74.9	4	81.6	2	74	1	93.1	10	74.8	1	86.4	3	64.4	1	89.4	2	88.3	3	89.4	10	90.8	2	86.8	4	95.7	3	93.8	2	95.7	11	95.7	31
		LNVRPSI	47.7	2	35.5	2	48.5	1	33	2	33.5	1	48.5	8	42.9	1	26.5	2					44.3	1	44.3	4	27.2	1	43.6	1			37.2	1	43.6	3	48.5	15
		LTHEIR	26.1	1									26.1	1																	39.5	1			39.5	1	39.5	2
		LVLNR					32	1	24.7	1			32	2			30.5	2					26.5	1	30.5	3	37.5	1	34.5	1	32.1	1			37.5	3	37.5	8
		TNIQEYWR							32.4	2			32.4	2					65.7	1	32.5	1	51.1	1	65.7	3					62.9	2	22.2	1	62.9	3	65.7	8
		VANFTR	39.9	1	42	1	26.9	1			35.2	1	42	4									38	1	38	1	39.6	1			39.5	1			39.6	2	42	7
		VPTPTNSYTGIR	69.7	1									69.7	1	42.8	2							56.1	1	56.1	3			55.2	1	57.3	1			57.3	2	69.7	6
		VVGGANHSHATK																													31.9	1			31.9	1	31.9	1
		WVEILSEPR	63.4	1	59.3	1	57.3	1	48.4	1			63.4	4	42.9	2	52.3	1	58.9	1	41.5	1			58.9	5	59.5	2	55	1	57.4	2	60	1	60	6	63.4	15
AT1G21270.1	WAK2 wall-associated kinase 2 chr1:7444997-7447345 FORWARD LENGTH=732	ILGQGGQGTVYK													32.2	1									32.2	1					27.7	1			27.7	1	32.2	2
		VSGAGPSNVDVK																													55.8	1			55.8	1	55.8	1
AT1G23310.1,AT1G23310.2	GGT1, AOAT1, GGAT1 glutamate:glyoxylate aminotransferase chr1:8268720-8271329 REVERSE LENGTH=481	AKHYLSLTSGGLGAYSDSR					32.8	1					32.8	1									30.1	1	30.1	1											32.8	2
		ALDYDTLNENVKK			34.5	1							34.5	1					24.8	1			50	1	50	2	80.1	1							80.1	1	80.1	4
		EVQLVSFHTVSK					30.9	1					30.9	1																							30.9	1
		GELYLR	26.1	1									26.1	1																							26.1	1
		LLEATGISTVPGSGFGQK																	48.5	1					48.5	1	30.9	1							30.9	1	48.5	2
AT1G26570.1	UGD1, ATUGD1 UDP-glucose dehydrogenase 1 chr1:9182801-9184246 FORWARD LENGTH=481	AADLTYWESAAR	59	2									59	2													44.2	1							44.2	1	59	3
		LAANAFLAQR	79.9	1	86	1	60.7	1					86	3			89.4	1							89.4	1	63.3	1			96.9	1			96.9	2	96.9	6
		VLIGGR													23.6	1									23.6	1											23.6	1
AT1G29910.1,AT1G29920.1,AT1G29930.1	CAB3, AB180, LHCB1.2 chlorophyll A/B binding protein 3 chr1:10472443-10473246 REVERSE LENGTH=267	ELEVIHSR	25.5	1							42.7	1	42.7	2	40.5	1			30.6	1			33.2	1	40.5	3					45.1	1			45.1	1	45.1	6
		FGEAVWFK	47	3			49.2	1			44.8	2	49.2	6	46.2	1	49.5	1	51.6	1			51.8	2	51.8	5	49.6	4	49.2	3	51.8	3			51.8	10	51.8	21
		GPSGSPWYGSDR	65	4	55.7	4			42.9	1			65	9	51.7	3	58.6	4	57	4	51.9	1			58.6	12	51	4	59.4	3	56.4	1	46.9	1	59.4	9	65	30
		GPSGSPWYGSDRVK	50.3	4			70.4	2	18	1	64.2	1	70.4	8	29.2	1			51.6	3	37.5	3	55.6	1	55.6	8	65.1	2	68.6	3	66.9	3			68.6	8	70.4	24
		NGVKFGEAVWFK													22.4	1							25.3	1	25.3	2					38.1	1			38.1	1	38.1	3
		NRELEVIHSR	58.2	8	54.4	4	39.9	3	79.2	2	49.2	4	79.2	21	51.8	8	55.4	6	45.6	6	60.5	2	52.8	4	60.5	26	59.7	7	74.4	7	42.6	4	69.1	2	74.4	20	79.2	67
		TVAKPK	24.5	1									24.5	1																							24.5	1
		TVAKPKGPSGSPWYGSDR																					46	1	46	1											46	1
		TVAKPKGPSGSPWYGSDRVK	37.7	1									37.7	1									36.8	1	36.8	1					32.7	1			32.7	1	37.7	3
		VAGNGPLGEAEDLLYPGGSFDPLGLATDPEAFAELK									41.4	1	41.4	1																							41.4	1
		VAGNGPLGEAEDLLYPGGSFDPLGLATDPEAFAELKVK									80.8	1	80.8	1																							80.8	1
		VKELKNGR													26.1	1									26.1	1											26.1	1
		VKYLGPFSGESPSYLTGEFPGDYGWDTAGLSADPETFAR	51.3	1									51.3	1																							51.3	1
		WAMLGALGcVFPELLAR	80.4	2									80.4	2													48.8	1			84.2	1			84.2	2	84.2	4
AT1G30360.1	ERD4 Early-responsive to dehydration stress protein (ERD4) chr1:10715892-10718799 FORWARD LENGTH=724	AEAILAATNNRPTNK													33.8	1									33.8	1											33.8	1
		GLEPWEGTSLTR													28	1									28	1											28	1
AT1G31330.1	PSAF photosystem I subunit F chr1:11215011-11215939 REVERSE LENGTH=221	EFLNGDLIAKDV	28.1	1									28.1	1																							28.1	1
		EIIIDVPLASR													50.4	1	42.6	1	35.6	1			24.5	1	50.4	4	25.8	1	35.1	1	22.5	1			35.1	3	50.4	7
		GFIWPVAAYR															40.1	1							40.1	1											40.1	1
		GFIWPVAAYREFLNGDLIAKDV	23.9	1									23.9	1																							23.9	1
		KLESSLK	34.9	1									34.9	1							27.3	1			27.3	1			31.3	1			27	1	31.3	2	34.9	4
		LYAPESAPALALNAQIEK	84.9	1									84.9	1									55.4	2	55.4	2			61.3	1	55.9	1			61.3	2	84.9	5
		RFDNYGK									25.8	1	25.8	1	32.7	1	44.9	1	33.8	1					44.9	3			31.7	1					31.7	1	44.9	5
AT1G32060.1	PRK phosphoribulokinase chr1:11532668-11534406 FORWARD LENGTH=395	ANDFDLMYEQVK	76.2	3	64.9	2	64.5	1	53	1			76.2	7	90.7	2	51.9	2	64.4	2	82.1	1			90.7	7	82.8	4	73.7	1	75.2	1	86	2	86	8	90.7	22
		FYGEVTQQmLK																															29.9	1	29.9	1	29.9	1
		IRDLYEQLIANKATAR					36.8	1					36.8	1																							36.8	1
		KLTcSYPGIK					49.3	1					49.3	1																	26.3	1			26.3	1	49.3	2
		KPDFDAFIDPQK															42.2	1							42.2	1											42.2	1
		LImKEGVK																									29.7	1							29.7	1	29.7	1
		LTSVFGGAAKPPK																					49.9	1	49.9	1					39	1			39	1	49.9	2
		RLTSVFGGAAKPPK	42.3	1									42.3	1																							42.3	1
		VRLImKEGVK					33.5	1					33.5	1																	24.1	1			24.1	1	33.5	2
AT1G32990.1	PRPL11 plastid ribosomal protein l11 chr1:11955827-11957139 FORWARD LENGTH=222	ATPAPPVGPALGSK	41.9	1	25.2	1							41.9	2					29	1					29	1											41.9	3
		GSKDPQQDKVGVITIDQLR	49.4	1									49.4	1																							49.4	1
		TPPASVLLLK	47.7	1									47.7	1			22.6	1							22.6	1	25	1							25	1	47.7	3
AT1G33120.1,AT1G33140.1	Ribosomal protein L6 family chr1:12010986-12012223 FORWARD LENGTH=194	FLDGIYVSEK																	53.6	1	43.2	1			53.6	2			34.9	1	26.5	1			34.9	2	53.6	4
		KFLDGIYVSEK																													35.2	1			35.2	1	35.2	1
		KVEMLDGVTIVR	41.1	1									41.1	1																	65.3	1			65.3	1	65.3	2
		SKIVEEE	27	1									27	1																							27	1
AT1G33590.1	Leucine-rich repeat (LRR) family protein chr1:12177788-12179221 FORWARD LENGTH=477	FLELGHNK													26.7	1									26.7	1											26.7	1
		LMSYLNLGGNR													52.6	1									52.6	1											52.6	1
		LTGTIPDIFK													34.6	1									34.6	1											34.6	1
		NLVFGKVPAmVAGLK													27.1	1									27.1	1											27.1	1
AT1G42970.1	GAPB glyceraldehyde-3-phosphate dehydrogenase B subunit chr1:16127552-16129584 FORWARD LENGTH=447	AAALNIVPTSTGAAK	93.7	3	81.3	3	98.4	3	75.3	2	102	4	102	15	95.7	3	83	4	70.5	2	77.4	4	69.2	4	95.7	17	83	5	67.1	4	77.4	4	98.2	4	98.2	17	102	49
		ARAAALNIVPTSTGAAK	30.4	1			104	2					104	3	66.2	1	37.3	1			32	2	109	3	109	7	42.4	2	60.8	1	102	2	28.5	2	102	7	109	17
		AVSLVLPQLK	60.4	1			38.9	2			44.2	1	60.4	4	53.2	1	75.5	2	52.8	2	48.3	1	64.5	3	75.5	9	55.1	2	33.4	2	65.7	3	46.5	1	65.7	8	75.5	21
		AVSLVLPQLKGK	43.3	1			49.4	1					49.4	2	23.2	1			31.2	1			57.9	1	57.9	3	28.8	1	38.2	1					38.2	2	57.9	7
		DSPLEVVVLNDSGGVK									80.3	1	80.3	1	100	1					26.9	1			100	2					46.6	1			46.6	1	100	4
		GLTAEDVNEAFR													39.9	1							75.8	1	75.8	2											75.8	2
		GLTAEDVNEAFRK					70.6	1			55.3	1	70.6	2	58.4	1	29.8	1	43.4	1					58.4	3	37.3	1	26	1			35.4	1	37.3	3	70.6	8
		GTmTTTHSYTGDQR	34.9	1			56.3	2			31.3	2	56.3	5	58.9	5	60.4	4			32.7	1	81.2	3	81.2	13	38.4	3	36.3	2	50.2	4	34.7	3	50.2	12	81.2	30
		IVDNETISVDGK					39.4	1			77.6	2	77.6	3	69.3	2					71.6	1	76.7	1	76.7	4					24.5	1	43.3	1	43.3	2	77.6	9
		KGLTAEDVNEAFRK	44.5	2	32.3	1	52.8	1			47.8	2	52.8	6			40.5	1	26.4	1			53.6	1	53.6	3	31.6	2	20.4	1					31.6	3	53.6	12
		LLDASHR			26	1							26	1	50	2	33.2	1	44.1	2	45	2			50	7	44.3	2	24.3	1	32.2	1	52.4	1	52.4	5	52.4	13
		LLDASHRDLRR															20.9	1							20.9	1	20.7	1			20.2	1	21.5	1	21.5	3	21.5	4
		VIITAPAK			23.6	1							23.6	1	24.7	1	27.9	1	25	1	27.5	1	32.3	1	32.3	5	28.5	1	39	1			28.1	1	39	3	39	9
		VLDEEFGIVK	80.7	1	51	2	54.5	1	38.2	1	58.3	2	80.7	7	88.9	3	73.1	4	68.3	3	71.2	3	81.2	3	88.9	16	67.6	4	80.9	2	75.2	3	66.3	3	80.9	12	88.9	35
		VLDEEFGIVKGTmTTTHSYTGDQR																													35.2	1			35.2	1	35.2	1
		VVDLAHLVASK	40.2	1									40.2	1	72.4	2	51.5	1	76	2	26.4	2			76	7	57.7	2	61.1	3	46.2	1			61.1	6	76	14
AT1G44575.1	NPQ4, PSBS Chlorophyll A-B binding family protein chr1:16871768-16873194 FORWARD LENGTH=265	ANELFVGR																	28.3	1					28.3	1											28.3	1
		EQGPLFGFTK	31	1									31	1	28	1									28	1	33.7	1							33.7	1	33.7	3
		FVDDPPTGLEK	37.5	1									37.5	1	50.9	1									50.9	1	39.1	1	27.1	1					39.1	2	50.9	4
		GKFVDDPPTGLEK													57	1									57	1											57	1
		SALGLKEQGPLFGFTK	64.4	2									64.4	2	27.3	1	44	1							44	2	30.9	1	37.3	1					37.3	2	64.4	6
		SKVEDGIFGTSGGIGFTK	27.9	1									27.9	1																							27.9	1
		VEDGIFGTSGGIGFTK													82	1									82	1											82	1
AT1G47128.1	RD21, RD21A Granulin repeat cysteine protease family protein chr1:17283139-17285609 REVERSE LENGTH=462	AVAHQPISIAIEAGGR																													58.3	1			58.3	1	58.3	1
		cGIAIEPSYPIK													47.6	1									47.6	1											47.6	1
		GVDGTcDQIRK													55.4	1									55.4	1											55.4	1
		NGGIDTDKDYPYK													33.1	1									33.1	1											33.1	1
		SWGESGYLR									30.9	1	30.9	1	39.7	1									39.7	1											39.7	2
		VVTIDSYEDVPTYSEESLKK													36.8	1							39.9	1	39.9	2							40.6	1	40.6	1	40.6	3
AT1G48030.1,AT1G48030.2	mtLPD1 mitochondrial lipoamide dehydrogenase 1 chr1:17717432-17719141 REVERSE LENGTH=507	AIDNAEGLVK	25.1	1									25.1	1													24.2	1							24.2	1	25.1	2
		HIIVATGSDVK	26	1	23.9	1							26	2					33.1	1					33.1	1	21.7	1							21.7	1	33.1	4
AT1G49240.1,AT3G18780.1,AT3G18780.2	ACT8 actin 8 chr1:18216539-18217947 FORWARD LENGTH=377	AGFAGDDAPR	70	2	67.9	3	65.5	3	58.9	1	28.1	2	70	11	83.7	2	67.5	2	72.4	2	74.4	1	79.1	1	83.7	8	57	2	60.8	3	74.5	1	74.7	1	74.7	7	83.7	26
		AVFPSVVGRPR	41	1			44.7	1			60.9	1	60.9	3	48.5	1	41.2	1	66.4	1			68.2	1	68.2	4	54.5	1	57.2	1	68.6	1			68.6	3	68.6	10
		DAYVGDEAQSK	33.7	1									33.7	1			48.6	2							48.6	2	45.4	1							45.4	1	48.6	4
		DAYVGDEAQSKR	24.1	1							45.9	1	45.9	2			47	1					44.8	1	47	2	31.6	1			31.1	1			31.6	2	47	6
		EITALAPSSmK									39	3	39	3	40.6	3					48.8	1			48.8	4			28.8	1	31	1	38.1	2	38.1	4	48.8	11
		EITALAPSSmKIK																													25.3	1			25.3	1	25.3	1
		GYmFTTTAER													43.1	1									43.1	1											43.1	1
		IAPEEHPVLLTEAPLNPK					21.1	1	22.1	1	35.4	1	35.4	3	55.3	4			23.8	1	40.6	1	60.7	3	60.7	9			23.8	2	39.8	2	42.8	2	42.8	6	60.7	18
		IKVVAPPERK																													26.5	1			26.5	1	26.5	1
		LSFVAVDYEQEmETSK									29.9	1	29.9	1																							29.9	1
		mSKEITALAPSSmK					32	1					32	1	51.3	2							47.2	1	51.3	3					65.3	2			65.3	2	65.3	6
		NYELPDGQVITIGAER													70.7	1									70.7	1					79.4	1			79.4	1	79.4	2
		VVAPPERK	30.1	1									30.1	1													27.1	1	35.1	1					35.1	2	35.1	3
AT1G50200.1,AT1G50200.2	ALATS, ACD Alanyl-tRNA synthetase chr1:18591429-18598311 REVERSE LENGTH=1003	AFALLSEEGIAK																					38.1	1	38.1	1					20.9	1			20.9	1	38.1	2
		SRVDAAIIPAAK																													21.8	1			21.8	1	21.8	1
AT1G51500.1	CER5, D3, ABCG12, WBC12, ATWBC12 ABC-2 type transporter family protein chr1:19097967-19100972 REVERSE LENGTH=687	KGSEATWFK																													24.5	1			24.5	1	24.5	1
		NVImTGNLLLNGKK																					59	1	59	1											59	1
		STLLDSLAGR																									32.1	1			54.1	2	37.1	1	54.1	4	54.1	4
AT1G52400.1,AT1G52400.3	BGL1, BGLU18, ATBG1 beta glucosidase 18 chr1:19515250-19517930 FORWARD LENGTH=528	AGYDNGKKAPGR							27	1			27	1																			37.2	2	37.2	2	37.2	3
		DLNTDAFR							42.4	1			42.4	1							33.4	1			33.4	1											42.4	2
		GPSMWDTFTK							59	2			59	2	45.3	1					41.7	1			45.3	2											59	4
		GSTDYVGmNYYTSVFAK							78.5	1			78.5	1																			66.1	1	66.1	1	78.5	2
		IGSKPFNGKLDVYSK							48.6	1			48.6	1																							48.6	1
		KFPHR							23.3	1			23.3	1																							23.3	1
		KYYIQR							32.2	1			32.2	1																							32.2	1
		LLKGSTDYVGmNYYTSVFAK							38.5	1			38.5	1																			42.2	1	42.2	1	42.2	2
		LSIAWPR							47.9	1			47.9	1	45.9	2					41.6	2			45.9	4							48.3	1	48.3	1	48.3	6
		SPSWTTDSLVDWDSK							85.6	2			85.6	2	76.9	1									76.9	1							47.2	1	47.2	1	85.6	4
		VGHRLPK							25.9	1			25.9	1																							25.9	1
		YKEDIQLMK							47	3			47	3							54	6	23.9	1	54	7							34.4	3	34.4	3	54	13
		YKEDIQLmKDLNTDAFR							31.4	1			31.4	1																			33.5	1	33.5	1	33.5	2
		YYIQR							28	1			28	1																			22.9	1	22.9	1	28	2
AT1G53240.1	mMDH1 Lactate/malate dehydrogenase family protein chr1:19854966-19856802 REVERSE LENGTH=341	ALEGADLVIIPAGVPR	38.3	1									38.3	1	68.3	1							60.6	1	68.3	2	53.8	1			57.3	1			57.3	2	68.3	5
		KLFGVTTLDVVR	38	1									38	1			51.9	1							51.9	1											51.9	2
		RTQDGGTEVVEAK													28.4	1	30.5	1					40.7	1	40.7	3											40.7	3
		SEVVGYMGDDNLAK																									36.3	1							36.3	1	36.3	1
		TQDGGTEVVEAK	91.8	2									91.8	2	61.3	2	71.5	2							71.5	4	67.2	2							67.2	2	91.8	8
		VAILGAAGGIGQPLALLmK	46	1									46	1																							46	1
AT1G54010.1	GDSL-like Lipase/Acylhydrolase superfamily protein chr1:20158854-20160747 REVERSE LENGTH=386	FSDGLIAPDFLAK																			40.8	1			40.8	1							46.8	1	46.8	1	46.8	2
		IGPmLNELAR							69.6	1			69.6	1							74.6	1			74.6	1							69.2	1	69.2	1	74.6	3
		LcEYQR							24.5	1			24.5	1																							24.5	1
		SRDDPNGKFSDGLIAPDFLAK																															21.1	1	21.1	1	21.1	1
		TLLPQTFWPYGK							27.9	1			27.9	1							45.3	2			45.3	2							41.5	1	41.5	1	45.3	4
AT1G55490.1,AT1G55490.2	CPN60B, LEN1 chaperonin 60 beta chr1:20715717-20718673 REVERSE LENGTH=600	AGKEVLGNASK															29	1							29	1											29	1
		ALSYPLKLIAK																													34.1	1			34.1	1	34.1	1
		ETSTIVGDGSTQDAVK													66.6	1									66.6	1											66.6	1
		EVELEDPVENIGAK	29.1	1									29.1	1	71.7	1	30.5	1	37	1	47.1	1	82.5	1	82.5	5	64	1	29.7	1					64	2	82.5	8
		LADLVGVTLGPK	59	1			50	1	42.9	1			59	3			80.9	2	52.2	2					80.9	4	63.8	3	38.6	1	54.4	1	29.1	1	63.8	6	80.9	13
		LRVEDALNATK					32.7	1					32.7	1																	34.2	1			34.2	1	34.2	2
		LSGGVAVIQVGAQTETELKEK									53.5	4	53.5	4	34.7	4									34.7	4											53.5	8
		LSGGVAVIQVGAQTETELKEKK									58.3	2	58.3	2																							58.3	2
		NAGVNGSVVSEK					30.6	1					30.6	1									39	1	39	1											39	2
		NVVLESKYGSPR																					43.8	1	43.8	1											43.8	1
		SQYLDDIAILTGATVIREEVGLSLDK									44.6	1	44.6	1																							44.6	1
		VVAAGANPVLITR	28.1	1	64.4	1	70.3	1					70.3	3	56.9	1			30.3	1					56.9	2	58.6	1							58.6	1	70.3	6
AT1G56070.1	LOS1 Ribosomal protein S5/Elongation factor G/III/V family protein chr1:20968245-20971077 REVERSE LENGTH=843	AmKFSVSPVVR	26.3	1			28.1	1					28.1	2					18.5	1					18.5	1	22.2	1							22.2	1	28.1	4
		EAmTPLSEFEDKL													35.5	1									35.5	1											35.5	1
		EGPLAEENMR			24	1							24	1					24	1					24	1											24	2
		FGVVESK																					29	1	29	1					34.2	1			34.2	1	34.2	2
		FSVSPVVR																									28.3	1							28.3	1	28.3	1
		GGGQVIPTAR	29.1	1									29.1	1																							29.1	1
		IRPVLTVNKmDR					28.2	1					28.2	1																							28.2	1
		LWGENFFDPATR													44.5	1									44.5	1											44.5	1
		MIPASDKGR			21.3	1							21.3	1															27.2	1					27.2	1	27.2	2
		NATLTNEKEVDAHPIR	31.9	2	37.3	2	55	1					55	5	31.2	1	24.9	1	47.6	1	36.2	1			47.6	4	47.5	3	34.2	2	50.7	1			50.7	6	55	15
		RVIYASQITAKPR	40.5	2	42	1	53.1	1					53.1	4	23	1	33.9	1			36.7	1	42.7	1	42.7	4			51.7	1	49.5	1	32	1	51.7	3	53.1	11
		TVmSKSPNKHNR																					24.5	1	24.5	1					32.1	1			32.1	1	32.1	2
		VIYASQITAKPR	43.5	1									43.5	1	42.7	1	43.6	1	45.8	1					45.8	3	52.1	1			43	1			52.1	2	52.1	6
		VKFTADELR					26.7	1					26.7	1																	33.1	1			33.1	1	33.1	2
		VKFTADELRR	31.7	1			36	2					36	3																	36.5	1			36.5	1	36.5	4
AT1G56110.1	NOP56 homolog of nucleolar protein NOP56 chr1:20984544-20986893 REVERSE LENGTH=522	FSLGLAEPK							42.5	3			42.5	3																							42.5	3
		IVNDNYLYAR							45.5	1			45.5	1																							45.5	1
		TSVSDLSR							33.8	1			33.8	1																							33.8	1
AT1G57720.1,AT1G57720.2	Translation elongation factor EF1B, gamma chain chr1:21377873-21380114 FORWARD LENGTH=413	AAPVAEAPKPAEEEEAPKPK					33.3	1					33.3	1									18.8	1	18.8	1											33.3	2
		KAAPVAEAPKPAEEEEAPKPK													51.4	2							66.6	1	66.6	3					68.3	1			68.3	1	68.3	4
		mNPIGKVPVLETPEGPIFESNAIAR																					25.9	1	25.9	1											25.9	1
		VSQmIEDAEPFEGEALLDAK																					38.4	1	38.4	1											38.4	1
AT1G59870.1	PEN3, PDR8, ATPDR8, ABCG36, ATABCG36 ABC-2 and Plant PDR ABC-type transporter family protein chr1:22034661-22039844 FORWARD LENGTH=1469	EKDAGIFPEADVDLFmK																					24.5	1	24.5	1											24.5	1
		mSNELAVPFDKSR																													24	1			24	1	24	1
		SLPTLLNVVR																											24.5	1					24.5	1	24.5	1
		VQETFAR																											24.6	1					24.6	1	24.6	1
		VTTGEmIVGPTK																					45.3	1	45.3	1											45.3	1
		YKSFHVGTK																													25.7	1			25.7	1	25.7	1
AT1G61520.1,AT1G61520.2,AT1G61520.3	LHCA3 photosystem I light harvesting complex gene 3 chr1:22700152-22701149 FORWARD LENGTH=273	FAmLGAAGAIAPEILGK	94.8	3			74.1	1			83.2	2	94.8	6	118	3	48.7	2			53	1	97.8	4	118	10	98.8	2	64.7	3	105	6			105	11	118	27
		GLAGSGNPAYPGGPFFNPLGFGKDEK	57.3	1							64	1	64	2	45.3	1	62.2	1			62.2	1	66.7	2	66.7	5	44.2	1	52.2	1	61.9	1			61.9	3	66.7	10
		LQDWYNPGSmGK	62.1	2			41.2	1	24.8	1	82.3	2	82.3	6	78.2	1	27.1	1	23.7	1					78.2	3	67.3	2	54.4	2	40	1	42.2	2	67.3	7	82.3	16
		QYFLGLEK	44.8	1							44	1	44.8	2			33.8	1					32.2	1	33.8	2	44.7	1	49.6	1	32.5	1			49.6	3	49.6	7
		RLQDWYNPGSmGK									48.6	1	48.6	1	60	1							39.1	1	60	2	37.5	2	37	1	63.4	1			63.4	4	63.4	7
		SLKELK	38.8	1									38.8	1															40.4	1					40.4	1	40.4	2
		WLAYGEIINGR	71.2	1			64.5	1			68.5	1	71.2	3	68.3	1	75.9	1					54.5	2	75.9	4	60.2	1	59.1	1	67.7	3			67.7	5	75.9	12
AT1G65930.1	cICDH cytosolic NADP+-dependent isocitrate dehydrogenase chr1:24539088-24541861 FORWARD LENGTH=410	ATDAVIKGPGK	22.1	1									22.1	1																							22.1	1
		DLALIIHGSK																									30.7	1							30.7	1	30.7	1
		HAFGDQYR	32.9	1									32.9	1																							32.9	1
		LIDDmVAYALK					28.9	1					28.9	1																							28.9	1
AT1G66200.1,AT1G66200.3	ATGSR2, GSR2, GLN1;2 glutamine synthase clone F11 chr1:24655520-24657520 REVERSE LENGTH=356	SmREEGGYEIIKK													45.9	1									45.9	1											45.9	1
		TLPGPVTDPSKLPK													42.5	1									42.5	1											42.5	1
		YILER													28	1									28	1											28	1
AT1G67090.1	RBCS1A ribulose bisphosphate carboxylase small chain 1A chr1:25048465-25049249 REVERSE LENGTH=180	EYPNAFIR															40.4	1							40.4	1			24.2	1					24.2	1	40.4	2
		FETLSYLPDLTDSELAKEVDYLIR	27.8	1									27.8	1																							27.8	1
		IIGFDNTR	37	3									37	3			35.2	3							35.2	3			32.1	2					32.1	2	37	8
		KFETLSYLPDLTDSELAKEVDYLIR	93	2									93	2																							93	2
		LPLFGcTDSAQVLK															60	1							60	1											60	1
		QVQcISFIAYKPPSFTG	24	1									24	1																							24	1
AT1G67430.1	Ribosomal protein L22p/L17e family protein chr1:25262209-25263627 FORWARD LENGTH=175	SAQFVLDLLK	62.6	1									62.6	1	27.7	1	30.5	1							30.5	2	29.3	1							29.3	1	62.6	4
		VKYSQEPDNQTK	51.6	1									51.6	1																							51.6	1
AT1G68010.1,AT1G68010.2	HPR, ATHPR1 hydroxypyruvate reductase chr1:25493418-25495720 FORWARD LENGTH=386	ALGLPVSKL	39	1									39	1			33.7	3	45.7	1					45.7	4	44.5	2	45.5	1					45.5	3	45.7	8
		EGmATLAALNVLGR	78.9	2			67.4	1					78.9	3			85	1	30.1	1			52.2	2	85	4	43.3	1	70.1	1	81.9	1			81.9	3	85	10
AT1G68560.1	ATXYL1, XYL1, TRG1 alpha-xylosidase 1 chr1:25734435-25737897 REVERSE LENGTH=915	EASLYGLGENSQANGIK							58.6	2			58.6	2																							58.6	2
		LYLDEDELPEmK							44.8	1			44.8	1																							44.8	1
		QELYQWDTVADSAR													63.7	1									63.7	1											63.7	1
		TVSWWGDEIKR													48.5	1									48.5	1											48.5	1
		VSVLGLR							31.4	1			31.4	1																							31.4	1
		WIEVGAFYPFSR													38.5	1									38.5	1											38.5	1
AT1G69740.1,AT1G69740.2	HEMB1 Aldolase superfamily protein chr1:26232197-26234713 FORWARD LENGTH=430	AGADVVSPSDmmDGR					43.6	1					43.6	1									38.9	1	38.9	1											43.6	2
		AGADVVSPSDmmDGRVGAIR																					25.7	1	25.7	1											25.7	1
		AVGVNSIVLFPK	44.6	1			54.3	2					54.3	3									52.2	2	52.2	2			33.1	1					33.1	1	54.3	6
		HGLVQEVAK			23	1	33.9	1					33.9	2																							33.9	2
		TYQmNPANYR					34.6	1					34.6	1																	40.7	1			40.7	1	40.7	2
AT1G71500.1	Rieske (2Fe-2S) domain-containing protein chr1:26936084-26937331 FORWARD LENGTH=287	AQPGLTATNVNVDEVR					90.3	2			78.3	2	90.3	4	45.4	1							85.2	1	85.2	2					100	1			100	1	100	7
		mIVDEGSEGFGFTK					51.5	1					51.5	1	64.5	1			37.8	1					64.5	2	54.2	1	74.2	1	57.6	1			74.2	3	74.2	6
		NWVPVVPLSALPK															38.7	1							38.7	1											38.7	1
		SPAEGAYSEGLLNAR					82.3	1			71.4	1	82.3	2	90	1					57.9	1			90	2					113	1	51.1	1	113	2	113	6
AT1G72150.1	PATL1 PATELLIN 1 chr1:27148558-27150652 FORWARD LENGTH=573	AIDFSNPEAK																													38.3	1			38.3	1	38.3	1
		EFTAPVTPVKEEK													30.5	1									30.5	1											30.5	1
		SSFVFVSDFR													41.2	1									41.2	1											41.2	1
		TFGSIITSPR																									39.9	1							39.9	1	39.9	1
		VVVLTAEEVQKK													26.7	1									26.7	1											26.7	1
		YIAPEQVPVK													33.3	1									33.3	1	21.1	1							21.1	1	33.3	2
AT1G72370.1,AT1G72370.2	P40, AP40, RP40, RPSAA 40s ribosomal protein SA chr1:27243148-27244842 REVERSE LENGTH=298	FAQYTGANAIAGR	31.4	1									31.4	1					39	1			84.5	1	84.5	2											84.5	3
		HTPGTFTNQmQTSFSEPR													28.4	2									28.4	2											28.4	2
		RNDGIYIFNLGK																					49.2	1	49.2	1											49.2	1
		VIVAIENPQDIIVQSARPYGQR																													41.4	1			41.4	1	41.4	1
AT1G72610.1	GLP1, ATGER1, GER1 germin-like protein 1 chr1:27339302-27339928 REVERSE LENGTH=208	AETPAGYPcIRPIHVK													26.1	1									26.1	1											26.1	1
		KLKGVLGGTG							66.9	1			66.9	1																							66.9	1
		LDLAPK	46.3	1	32.3	1	28.7	1	46.3	1	36.1	1	46.3	5	43.5	2	39.2	1	43.5	1	46.2	2	26.2	1	46.2	7							43.8	1	43.8	1	46.3	13
		LKGVLGGTG							40	1			40	1					41.8	1	39.1	2	33.8	1	41.8	4							35.3	1	35.3	1	41.8	6
AT1G74470.1	Pyridine nucleotide-disulphide oxidoreductase family protein chr1:27991248-27992845 FORWARD LENGTH=467	mKmISPSNIAVDIGR					21.7	1					21.7	1																							21.7	1
		VALVGDAAGYVTK					58.9	1					58.9	1							27	1	64.2	1	64.2	2	62.3	1			31.4	1			62.3	2	64.2	5
AT1G75750.1,AT1G75750.2	GASA1 GAST1 protein homolog 1 chr1:28441813-28442284 REVERSE LENGTH=98	IDcGSAcVAR																			54.5	1			54.5	1							58.4	1	58.4	1	58.4	2
		KIDcGSAcVAR							29.9	1			29.9	1							37.9	1			37.9	1							56.5	1	56.5	1	56.5	3
AT1G76160.1	sks5 SKU5 similar 5 chr1:28578211-28581020 REVERSE LENGTH=541	AAGGFGGIR							39.8	1			39.8	1	26.9	1									26.9	1											39.8	2
		YAVNSVSFKPADTPLK							24.2	1			24.2	1																							24.2	1
AT1G78830.1	Curculin-like (mannose-binding) lectin family protein chr1:29637141-29638508 REVERSE LENGTH=455	GMcNAcPTPK													31.1	2									31.1	2											31.1	2
		NGNLVLAEADGR							31.1	1			31.1	1	48.2	1									48.2	1							54.2	1	54.2	1	54.2	3
		NGNLVLAEADGRVK													51.1	1									51.1	1											51.1	1
AT1G78900.1,AT1G78900.2	VHA-A vacuolar ATP synthase subunit A chr1:29660463-29664575 FORWARD LENGTH=623	ISGDVYIPR	55.2	2	31.4	1	52	1	61.3	2			61.3	6	56	2	33.4	1	63.7	1					63.7	4	64.5	2	51.6	1	53.8	2	60.9	1	64.5	6	64.5	16
		LAADTPLLTGQR	92.1	3	71.9	1	56.1	2	49.4	1	41	1	92.1	8	81.9	1	60.7	1							81.9	2					54.2	2	53.7	1	54.2	3	92.1	13
		LAEmPADSGYPAYLAAR													87.6	1									87.6	1	48.6	1			81.1	2			81.1	3	87.6	4
		LGDLFYR													31.8	1									31.8	1											31.8	1
		LTTFEDDEKESEYGYVR													23.6	1									23.6	1											23.6	1
		LVSQKFEDPAEGEDTLVEK													69.3	1									69.3	1											69.3	1
		LYDDLNAGFR							26	1			26	1	67	1									67	1											67	2
		SYTMLQSWPVR													38.7	1									38.7	1											38.7	1
		TTLVANTSNmPVAAR							43.2	1			43.2	1	65.1	2									65.1	2					52.8	1			52.8	1	65.1	4
		TVISQALSK																					24	1	24	1											24	1
AT1G79850.1	RPS17, CS17, PRPS17 ribosomal protein S17 chr1:30041473-30041922 REVERSE LENGTH=149	KAEAGGDELLGLPLESQQPA	72.5	1									72.5	1																							72.5	1
		SFVALPVIAR	67.7	1									67.7	1																							67.7	1
AT2G01180.1,AT2G01180.2	ATPAP1, PAP1, LPP1, ATLPP1 phosphatidic acid phosphatase 1 chr2:107182-108555 REVERSE LENGTH=327	GVPVTSSQNGDALR															50.3	1	34.8	1	75	1			75	3	40.6	1	49.9	1	36.6	1	73.1	1	73.1	4	75	7
		mQEIDLSVHTIK																					32.2	1	32.2	1					39.6	1			39.6	1	39.6	2
AT2G01250.1	Ribosomal protein L30/L7 family protein chr2:132943-134264 REVERSE LENGTH=242	RVEPYVTYGFPNLK	31.7	1									31.7	1									20.4	1	20.4	1											31.7	2
		SVKELIYKR																					39	1	39	1					19.1	1			19.1	1	39	2
		VVVPESVLK	26.5	1									26.5	1																							26.5	1
AT2G05070.1,AT2G05100.1,AT3G27690.1	LHCB2.2, LHCB2 photosystem II light harvesting complex gene 2.2 chr2:1799436-1800329 REVERSE LENGTH=265	ELEVIHSR	25.5	1							42.7	1	42.7	2	40.5	1			30.6	1			33.2	1	40.5	3					45.1	1			45.1	1	45.1	6
		FGEAVWFK	47	3			49.2	1			44.8	2	49.2	6	46.2	1			51.6	1			51.8	2	51.8	4	49.6	4	49.2	3	51.8	3			51.8	10	51.8	20
		IGGGPLGEGLDPLYPGGAFDPLNLAEDPEAFSELKVK	53.5	1							74.3	1	74.3	2																							74.3	2
		NGVKFGEAVWFK													22.4	1							25.3	1	25.3	2					38.1	1			38.1	1	38.1	3
		NRELEVIHSR	58.2	8			39.9	3	79.2	2	49.2	4	79.2	17	51.8	8			45.6	6	60.5	2	52.8	4	60.5	20	59.7	7	74.4	7	42.6	4			74.4	18	79.2	55
		STPQSIWYGPDRPK	52.1	6			49.1	2			47.3	1	52.1	9	51.7	1			25.4	2	34.2	1			51.7	4	51.8	2			60.3	1			60.3	3	60.3	16
		TVKSTPQSIWYGPDRPK																					43.4	1	43.4	1											43.4	1
		VKELKNGR													26.1	1									26.1	1											26.1	1
AT2G05990.1,AT2G05990.2	MOD1, ENR1 NAD(P)-binding Rossmann-fold superfamily protein chr2:2322876-2324867 FORWARD LENGTH=390	AALESDTR	26.6	1									26.6	1													37	1							37	1	37	2
		VNTISAGPLGSR	43.9	1									43.9	1	47.7	1									47.7	1	25.5	1							25.5	1	47.7	3
		VYALDAVFDNPEDVPEDVKTNKR					38.6	1					38.6	1																							38.6	1
AT2G06850.1	EXGT-A1, EXT, XTH4 xyloglucan endotransglucosylase/hydrolase 4 chr2:2763619-2765490 FORWARD LENGTH=296	AIDVPFGR					26.9	1					26.9	1																							26.9	1
		KAIDVPFGR	25.7	1	44.2	1	38.3	1					44.2	3									34	1	34	1	29.5	1			37.9	2	28.6	1	37.9	4	44.2	8
		NYVPTWAFDHQK					34.1	1					34.1	1																							34.1	1
		TGQPAILQTNVFTGGK					68.7	1					68.7	1							46	1	33.8	1	46	2							40.9	1	40.9	1	68.7	4
		TNWANAPFVASYK					24.6	1					24.6	1							50.2	1	46.3	1	50.2	2							31.9	1	31.9	1	50.2	4
AT2G07698.1	ATPase, F1 complex, alpha subunit protein chr2:3361474-3364028 FORWARD LENGTH=777	AAELTNLFESR	77.7	3	72.2	2	42.6	1	36.4	1	57.2	2	77.7	9	62.1	2	69.6	1	60.9	1			74.7	1	74.7	5	82.6	4	57.2	2	40.8	1	64.8	1	82.6	8	82.6	22
		APGILER	30.1	1									30.1	1																							30.1	1
		AVDSLVPIGR	35.5	1	39.6	1							39.6	2			30.9	1	45.8	1					45.8	2	67.4	1	56.9	1					67.4	2	67.4	6
		ELLIGDRQTGK	53.5	1	47.4	2	72.9	1			34.4	1	72.9	5	45.4	3	47.1	2	59.8	4	50	1	55	1	59.8	11	50.2	2	59.4	4	50.1	3	45	1	59.4	10	72.9	26
		GALSDHEQR																									35.9	1							35.9	1	35.9	1
		GGLTNER															36.8	1							36.8	1											36.8	1
		GQRELLIGDR																					29.7	1	29.7	1					24.8	1			24.8	1	29.7	2
		GQRELLIGDRQTGK	32.9	2	29.5	1							32.9	3	25.2	1			24.6	1			19.6	1	25.2	3					18.7	1			18.7	1	32.9	7
		KSVHEPmQTGLK																	21.9	1			26.6	1	26.6	2	21.8	1			20.8	1			21.8	2	26.6	4
		RPPGREAFPGDVFYLHSR																					24.9	1	24.9	1											24.9	1
		RVEVKAPGILER																					40.2	1	40.2	1					28.4	1			28.4	1	40.2	2
		SVHEPmQTGLK													26.4	1			18.1	1					26.4	2											26.4	2
		TGSIVDVPAGK	53.9	1	56.2	1	25	1					56.2	3			37.2	1							37.2	1	57.2	1			40.9	1			57.2	2	57.2	6
		TTIAIDTILNQK					36	1			48	1	48	2	41.5	2			36.5	1					41.5	3	30.1	1	38	1	50.3	1			50.3	3	50.3	8
		VGSAAQLK	35.9	2									35.9	2	37.3	1	39.4	2							39.4	3	38.6	1			38.8	1	30.8	1	38.8	3	39.4	8
		VVDAMGVPIDGK													67.2	1	48.1	1							67.2	2			47.8	1	35.5	1			47.8	2	67.2	4
		VVDAmGVPIDGKGALSDHEQR													28.2	1							68.9	2	68.9	3	29	1			21.6	1			29	2	68.9	5
AT2G13360.1,AT2G13360.2	AGT, AGT1, SGAT alanine:glyoxylate aminotransferase chr2:5539417-5540902 REVERSE LENGTH=401	ALSLPTGLGIVcASPK	29.1	1			23.6	1					29.1	2			60.1	1					42.1	1	60.1	2					77.1	2			77.1	2	77.1	6
		AmNRNNEDYRSPAIPALTK																									17.2	1			28	1			28	2	28	2
		HHLFVPGPVNIPEPVIR					31.5	1					31.5	1																							31.5	1
		LSQDENHTIK	30	2			37.7	1					37.7	3									33.6	1	33.6	1					29.7	1			29.7	1	37.7	5
		NNEDYRSPAIPALTK	30.3	1			43.5	1					43.5	2			25.1	1	26.6	1			43.4	2	43.4	4					41.7	3			41.7	3	43.5	9
		RAWQR																					34.6	1	34.6	1											34.6	1
		TLLEDVKK					40.2	1					40.2	1					41.1	1			35.9	1	41.1	2			40.4	1					40.4	1	41.1	4
		YNLSLGLGLNK					48.8	1					48.8	1																							48.8	1
		YNLSLGLGLNKVAGK					61.7	1					61.7	1																							61.7	1
AT2G17360.1,AT5G07090.1,AT5G07090.2,AT5G58420.1	Ribosomal protein S4 (RPS4A) family protein chr2:7546598-7548138 FORWARD LENGTH=261	GIPYLNTYDGR	37.1	1									37.1	1									35.3	1	35.3	1					29.8	1			29.8	1	37.1	3
		LGNVYTIGK																			31.4	1			31.4	1											31.4	1
		TNENFR	30.1	1									30.1	1																							30.1	1
AT2G18020.1	EMB2296 Ribosomal protein L2 family chr2:7837151-7838160 FORWARD LENGTH=258	AGNAYHKYR																					30.1	1	30.1	1	20.4	1			22.4	1			22.4	2	30.1	3
		AmIGQVAGGGR																					29.8	1	29.8	1											29.8	1
		ATLVVGNVLPLR													25.8	1									25.8	1											25.8	1
		LRGQAAASAAKAD																					25.5	1	25.5	1											25.5	1
AT2G18960.1	AHA1, PMA, OST2, HA1 H(+)-ATPase 1 chr2:8221858-8227268 FORWARD LENGTH=949	AAHLVDSTNQVGHFQK																					32.5	1	32.5	1					25.5	1			25.5	1	32.5	2
		ADIGIAVADATDAAR																	34.3	1			66.7	1	66.7	2	72.8	1			51.3	1			72.8	2	72.8	4
		EAQWAQAQR																													28.9	1			28.9	1	28.9	1
		GAPEQILDLANARPDLR																					31.9	1	31.9	1											31.9	1
		KADIGIAVADATDAAR													61.3	1	49.9	1	72.9	1					72.9	3					114	1			114	1	114	4
		KHIVGmTGDGVNDAPALK															20.4	1							20.4	1											20.4	1
		KHIVGmTGDGVNDAPALKK																													24.3	1			24.3	1	24.3	1
		LGDIIPADAR													37.4	1									37.4	1	56.9	2			55	2	50.6	2	56.9	6	56.9	7
		LSQQGAITKR																	20.6	1			67.9	1	67.9	2			19.4	1	43.5	2			43.5	3	67.9	5
		mITGDQLAIGK													30	1									30	1					39.4	1			39.4	1	39.4	2
		mITGDQLAIGKETGR																													38.2	1			38.2	1	38.2	1
		mITGDQLAIGKETGRR																	34.7	1					34.7	1											34.7	1
		RALNLGVNVK																					33.7	1	33.7	1					31	1			31	1	33.7	2
		SLAVAR													26.9	1									26.9	1											26.9	1
		TALTYIDSDGNWHR													34.4	2							76.4	1	76.4	3					72.9	2			72.9	2	76.4	5
		VENQDAIDAAmVGmLADPK													65	1							83.8	1	83.8	2											83.8	2
		VENQDAIDAAmVGmLADPKEAR																					31.8	1	31.8	1											31.8	1
AT2G20260.1	PSAE-2 photosystem I subunit E-2 chr2:8736780-8737644 FORWARD LENGTH=145	AAEDTPPATASSDSSSTTAAAAPAKVPAAK	59.5	1									59.5	1	32.4	1	46.7	1							46.7	2	49.6	1							49.6	1	59.5	4
		AKPPPIGPK	32.4	1									32.4	1			25.3	1							25.3	1	27.3	1							27.3	1	32.4	3
		NVGSVVAVDQDPK	57.3	1									57.3	1	72.2	1									72.2	1											72.2	2
		NVGSVVAVDQDPKTRYPVVVR	36	1									36	1			30.6	1							30.6	1											36	2
AT2G20580.1,AT4G28470.1	RPN1B, ATRPN1B 26S proteasome regulatory subunit S2 1B chr4:14067082-14072357 REVERSE LENGTH=891	LSEGYLTLAR																			62	1			62	1							61.4	1	61.4	1	62	2
		VGQAVDVVGQAGRPK					60.7	1					60.7	1	29.6	1					33.3	1	52.3	1	52.3	3	20.9	1			90.9	2			90.9	3	90.9	7
AT2G21330.1,AT2G21330.3	FBA1 fructose-bisphosphate aldolase 1 chr2:9128416-9130152 REVERSE LENGTH=399	AAQDILLAR	36.7	1			42.8	1					42.8	2	40	1	61	2	44	1	45.4	1	31.9	1	61	6	62.6	2	46.4	1			30.5	1	62.6	4	62.6	12
		AKANSLAQLGK	54.4	2	44.7	1	67.1	1					67.1	4	51.1	1	62.7	3			23.6	1	70.1	1	70.1	6	64.2	1			63.2	1			64.2	2	70.1	12
		ANSLAQLGK	37.3	1									37.3	1																							37.3	1
		ATPEQVASYTLK			29.1	1	40.2	1					40.2	2			51.8	1					63.1	1	63.1	2	50	2	26.7	1					50	3	63.1	7
		EAAWGLAR															43.4	1							43.4	1	33.7	1							33.7	1	43.4	2
		LASIGLENTEANR	77.6	2			71.6	1			73.3	1	77.6	4	92.6	2	101	1			26.6	1			101	4	108	2					53.1	1	108	3	108	11
		LASIGLENTEANRQAYR	24.2	1									24.2	1			32.6	2							32.6	2											32.6	3
		TAAYYQQGAR	41.3	2	31.6	2	45.6	1					45.6	5	50.2	1	47.2	2					56.3	1	56.3	4	52.1	4			38	1	26	1	52.1	6	56.3	15
		TIASPGHGImAmDESNATcGKR																					48.5	1	48.5	1					31.8	1			31.8	1	48.5	2
		TVVSIPNGPSALAVK					48.5	1					48.5	1	34.1	1									34.1	1					26.4	1			26.4	1	48.5	3
		TWGGKEENVK													30.8	1									30.8	1											30.8	1
		TWGGKEENVKAAQDILLAR															34.4	1							34.4	1											34.4	1
AT2G21390.1	Coatomer, alpha subunit chr2:9152428-9156577 FORWARD LENGTH=1218	AFSSSPVVPLAIER																					47.6	1	47.6	1					47.8	1			47.8	1	47.8	2
		GWSESSSPNVR															28.4	1							28.4	1											28.4	1
		NLKNEVVKK															19.1	1					21.3	1	21.3	2											21.3	2
		SLLDTNPTIESQAR																	54.9	1			56.7	1	56.7	2					37.7	1			37.7	1	56.7	3
		TLDVPIYITK																					39.2	1	39.2	1											39.2	1
AT2G27680.1	NAD(P)-linked oxidoreductase superfamily protein chr2:11803981-11805965 REVERSE LENGTH=384	HGVSIPTVAVR					28.8	1					28.8	1																							28.8	1
		YVLDQQGVGGSmIGVR					34.8	1					34.8	1																							34.8	1
AT2G27730.1	copper ion binding chr2:11820056-11820867 REVERSE LENGTH=113	QGPGEQAAGSASEAK	71.3	1									71.3	1	47	1			60.8	1					60.8	2											71.3	3
		VAGATASASAESGPK	78.5	1									78.5	1	104	1									104	1											104	2
AT2G28000.1	CPN60A, CH-CPN60A, SLP chaperonin-60alpha chr2:11926603-11929184 FORWARD LENGTH=586	AIELPNAmENAGAALIR																													80.6	1			80.6	1	80.6	1
		ALLSPAALIAQNAGVEGEVVVEK									31.6	1	31.6	1																							31.6	1
		APLLIIAEDVTGEALATLVVNK									102	5	102	5	67.6	3									67.6	3											102	8
		GVLNVVAVKAPGFGER															39.7	1							39.7	1											39.7	1
		HGLLSVTSGANPVSLKR																					27.8	1	27.8	1											27.8	1
		ITAIKDIIPILEK															47.4	2							47.4	2											47.4	2
		LLAEFENAR					39.2	1					39.2	1			34.2	1							34.2	1											39.2	2
		NVVLDEFGSPK																									38	1							38	1	38	1
		TNDSAGDGTTTASILAR															69.8	2							69.8	2	99.6	2	27.9	1	101	1			101	4	101	6
		VGAATETELEDR					72.6	1					72.6	1	71.4	2			26.3	1			59.1	1	71.4	4	77.6	1			67.1	1			77.6	2	77.6	7
		VLITDQK																									26.7	1							26.7	1	26.7	1
		VVNDGVTIAR	61	2	72	2							72	4			69	1	21.9	1					69	2	78.1	1	31.6	1					78.1	2	78.1	8
AT2G28190.1	CSD2, CZSOD2 copper/zinc superoxide dismutase 2 chr2:12014548-12016303 FORWARD LENGTH=216	AFVVHELKDDLGK	46.7	1									46.7	1			27	1							27	1			33.2	1					33.2	1	46.7	3
		AFVVHELKDDLGKGGHELSLTTGNAGGR															29.7	1							29.7	1											29.7	1
		KAVAVLK																											40.6	1					40.6	1	40.6	1
		LAcGVIGLTPL					25.2	1					25.2	1									22.1	1	22.1	1					45.3	1			45.3	1	45.3	3
AT2G30620.1	winged-helix DNA-binding transcription factor family protein chr2:13045360-13046267 FORWARD LENGTH=273	GKVAAAVAPAK													39.1	1									39.1	1											39.1	1
		SAATPKPAAPVK																															28.8	1	28.8	1	28.8	1
		TGSSQYAIQK							48.1	1			48.1	1	63.2	1					32.2	1			63.2	2											63.2	3
		VAAAVAPAK													24.4	1									24.4	1											24.4	1
AT2G30860.1	ATGSTF9, GLUTTR, ATGSTF7, GSTF9 glutathione S-transferase PHI 9 chr2:13139132-13140057 FORWARD LENGTH=215	ALVTLIEK																									51.4	1							51.4	1	51.4	1
		AYmIKDR	32.1	1									32.1	1																							32.1	1
		GVAFETIPVDLmK													28.1	1									28.1	1											28.1	1
		RALVTLIEK	44.8	1									44.8	1																							44.8	1
		SQGPDLLGK	39.5	1									39.5	1									32.8	1	32.8	1											39.5	2
		VYGPHFASPK													32.3	1									32.3	1											32.3	1
		YLAGDFVSLADLAHLPFTDYLVGPIGK	36.1	1									36.1	1																							36.1	1
		YRSQGPDLLGK	26.7	1									26.7	1																							26.7	1
		YVAEKYR																					22.1	1	22.1	1											22.1	1
AT2G33380.1	RD20, CLO-3 Caleosin-related family protein chr2:14144984-14146374 REVERSE LENGTH=236	AKHGSDSSTYDTEGR													21.1	1									21.1	1											21.1	1
		ALAAPDTEHPNGTEGHDSK													21.8	1									21.8	1											21.8	1
		GcFDGSLFEQIAK													36.7	1									36.7	1											36.7	1
		HGSDSSTYDTEGR													83.3	1									83.3	1											83.3	1
		NDLEETLPKPYmAR													52.2	2									52.2	2											52.2	2
		VRNDLEETLPKPYMAR									22.1	1	22.1	1	25.8	1									25.8	1											25.8	2
		YVPVNLENIFSK									34.8	1	34.8	1																							34.8	1
AT2G34430.1	LHB1B1, LHCB1.4 light-harvesting chlorophyll-protein complex II subunit B1 chr2:14524818-14525618 FORWARD LENGTH=266	ASKPTGPSGSPWYGSDR									48.9	2	48.9	2	75.1	2			42.8	1	42.9	1	33.3	1	75.1	5	37.8	1			44.9	1			44.9	2	75.1	9
		ASKPTGPSGSPWYGSDRVK					36.2	1			29.9	1	36.2	2	40.7	1							36	1	40.7	2	23.6	1							23.6	1	40.7	5
		ELEVIHSR	25.5	1							42.7	1	42.7	2	40.5	1			30.6	1			33.2	1	40.5	3					45.1	1			45.1	1	45.1	6
		FGEAVWFK	47	3			49.2	1			44.8	2	49.2	6	46.2	1			51.6	1			51.8	2	51.8	4	49.6	4			51.8	3			51.8	7	51.8	17
		NGVKFGEAVWFK													22.4	1							25.3	1	25.3	2					38.1	1			38.1	1	38.1	3
		NRELEVIHSR	58.2	8			39.9	3			49.2	4	58.2	15	51.8	8			45.6	6	60.5	2	52.8	4	60.5	20	59.7	7			42.6	4			59.7	11	60.5	46
		VKELKNGR													26.1	1									26.1	1											26.1	1
		VKYLGPFSGEPPSYLTGEFPGDYGWDTAGLSADPETFAR	35.9	1									35.9	1																							35.9	1
		WAMLGALGcVFPELLAR	80.4	2									80.4	2													48.8	1			84.2	1			84.2	2	84.2	4
AT2G34810.1	FAD-binding Berberine family protein chr2:14685292-14686914 FORWARD LENGTH=540	cLDTQPSDHGSPNSR													27.1	1									27.1	1											27.1	1
		mAEIASDATAFVHR													48.2	2									48.2	2											48.2	2
		QAMGEDVFWAIR													48.1	2									48.1	2											48.1	2
		SFKEAmAPFVSK													60.9	1									60.9	1											60.9	1
		VSTNEYYWKR													25.3	1									25.3	1											25.3	1
AT2G35490.1	Plastid-lipid associated protein PAP / fibrillin family protein chr2:14912309-14913797 REVERSE LENGTH=376	QSLNPLQDVAANISR													74.1	1									74.1	1											74.1	1
		SGPELEESGTR													72.6	1									72.6	1											72.6	1
AT2G36170.1,AT3G52590.1	Ubiquitin supergroup;Ribosomal protein L40e chr2:15172153-15173046 FORWARD LENGTH=128	AKIQDKEGIPPDQQR													24.8	1	23.3	1	28.2	1	31.6	1	25.2	1	31.6	5	40.3	1	24.5	1	27.3	4	38.5	1	40.3	7	40.3	12
		ESTLHLVLR													39.7	1	55.9	2	67.2	1			34	1	67.2	5	53.7	2	68.8	2	59.7	1			68.8	5	68.8	10
		IQDKEGIPPDQQR							36.7	1			36.7	1	42.2	4	34.4	3	74.7	6	48.8	3	54.6	7	74.7	23	50.5	3	58.6	5	65.3	7	52	5	65.3	20	74.7	44
		LIFAGK							29	1			29	1	31.2	1					33	1	37.2	1	37.2	3	43.2	1	37.5	1	39.3	2	35.9	2	43.2	6	43.2	10
		LIFAGKQLEDGR																	27.9	1			72.1	1	72.1	2					78.5	2			78.5	2	78.5	4
		MQIFVK							30.2	2			30.2	2	38.2	2	38.5	2	38.1	3	28	1	26.8	1	38.5	9			39.8	2	26.7	1	30.5	2	39.8	5	39.8	16
		TITLEVESSDTIDNVK	27.4	1							24.6	1	27.4	2	40.3	2									40.3	2											40.3	4
		TLADYNIQK																			24.9	1			24.9	1					28.2	1			28.2	1	28.2	2
		TLADYNIQKESTLHLVLR																					64.2	1	64.2	1											64.2	1
AT2G36460.1	Aldolase superfamily protein chr2:15296929-15298387 REVERSE LENGTH=358	GILAADESTGTIGKR					78.7	1					78.7	1					30.8	1			53.8	1	53.8	2											78.7	3
		LGEGAAESLHVK					48.8	1					48.8	1									47.3	1	47.3	1											48.8	2
		TVPAAVPAIVFLSGGQSEEEATR					77.5	1					77.5	1									37.2	1	37.2	1					31.7	1			31.7	1	77.5	3
		VAPEVIAEHTVR	26.2	1			60.3	1					60.3	2									46.5	1	46.5	1					48	1			48	1	60.3	4
		YYEAGAR	30.8	1									30.8	1																							30.8	1
AT2G36530.1	LOS2, ENO2 Enolase chr2:15321081-15323786 REVERSE LENGTH=444	AGAVVSGIPLYK	40	2	52.6	1	21.8	1					52.6	4			27.2	1	47.1	1	43.8	1			47.1	3	60.2	2	48.3	1	45.7	1	39.1	1	60.2	5	60.2	12
		AGAVVSGIPLYKHIANLAGNPK																					25.3	1	25.3	1											25.3	1
		AGWGVmTSHR																									16.6	1							16.6	1	16.6	1
		AVGNVNNIIGPALIGK																											39.3	1	23.9	1			39.3	2	39.3	2
		HIANLAGNPK	46.5	1	43.2	1	56.5	1					56.5	3	34.2	2							53	1	53	3											56.5	6
		ISGDALKDLYK	30.3	1	64.3	1	62.9	1					64.3	3							30.6	1			30.6	1					20.9	1	39.7	1	39.7	2	64.3	6
		KPVEPY	27.5	1									27.5	1																							27.5	1
		LAmQEFmILPVGAASFK																					30.9	1	30.9	1											30.9	1
		VNQIGSVTESIEAVK			33.5	1							33.5	1					32.3	1					32.3	1	45.1	1	64.4	1					64.4	2	64.4	4
		YGQDATNVGDEGGFAPNIQENKEGLELLK					65.6	1					65.6	1																							65.6	1
AT2G37190.1,AT3G53430.1	Ribosomal protein L11 family protein chr2:15619559-15620059 REVERSE LENGTH=166	ALKEPERDR																									18.9	1							18.9	1	18.9	1
		IGPLGLAPK	42.1	1							26.6	1	42.1	2	39.7	1			48.8	1					48.8	2	41.8	1	54.6	1					54.6	2	54.6	6
		SIAKELSGTVR	36	1									36	1																							36	1
		VTGGEVGAASSLAPK									37.4	1	37.4	1	69.5	1									69.5	1											69.5	2
		VTVVPSAAALVIK	72.2	1									72.2	1	34	1							51.8	1	51.8	2											72.2	3
AT2G37220.1	RNA-binding (RRM/RBD/RNP motifs) family protein chr2:15634980-15636331 REVERSE LENGTH=289	SLDGADLDGR					40.2	1					40.2	1					44.3	1			45.3	1	45.3	2	42.7	1			45	1			45	2	45.3	5
		SSFGSSGSGYGGGGGSGAGSGNR																					73	1	73	1											73	1
		VIYDRDSGR	32.8	1									32.8	1																							32.8	1
		VSEAEARPPR																									26	2							26	2	26	2
AT2G37270.1,AT2G37270.2,AT3G11940.1,AT3G11940.2	ATRPS5B, RPS5B ribosomal protein 5B chr2:15647883-15649042 REVERSE LENGTH=207	HATFVPHTAGR	44.6	1									44.6	1															46	1					46	1	46	2
		RQAVDISPLRR	22.2	1									22.2	1																							22.2	1
		VNQAIFLLTTGAR	78.7	1									78.7	1	80.5	1	49.4	1	39.5	1					80.5	3											80.5	4
AT2G37660.1	NAD(P)-binding Rossmann-fold superfamily protein chr2:15795481-15796977 REVERSE LENGTH=325	AGGLQDKDGGIR													28.3	1									28.3	1											28.3	1
		ALDLASKPEGTGTPTKDFK																													24	1			24	1	24	1
		ALFTQVTTKF					24.2	1					24.2	1			33.7	1					28.9	1	33.7	2	41.4	2			35.4	1			41.4	3	41.4	6
		LKERSEQFVAR																					18.2	1	18.2	1											18.2	1
		TGQIVYKK	37.6	2									37.6	2													26	1							26	1	37.6	3
AT2G38230.1	ATPDX1.1, PDX1.1 pyridoxine biosynthesis 1.1 chr2:16011475-16012404 FORWARD LENGTH=309	GGVImDVVNAEQAR					53.2	1					53.2	1									71.6	1	71.6	1											71.6	2
		IREGAAmIR																					27.5	1	27.5	1											27.5	1
		KIAAPYDLVVQTK					41.4	1					41.4	1									77	1	77	1											77	2
		NLGEALRR																	22.5	1					22.5	1											22.5	1
		TKGEAGTGNVVEAVR			26	1	80.6	2					80.6	3			19.1	1					33.5	1	33.5	2					34.6	1			34.6	1	80.6	6
		VGLAQmLR	57.4	1									57.4	1													57.3	1							57.3	1	57.4	2
AT2G38540.1	LP1, LTP1, ATLTP1 lipid transfer protein 1 chr2:16130418-16130893 FORWARD LENGTH=118	AcGVNIPYK	28	1									28	1							40.4	1			40.4	1							34.6	1	34.6	1	40.4	3
		ALGSGLNAGR	55.2	2	78.6	1			71.2	3			78.6	6					76.6	1	78.7	1			78.7	2			45.2	1			81.2	3	81.2	4	81.2	12
AT2G39730.2	RCA rubisco activase chr2:16571046-16573345 REVERSE LENGTH=446	ARVYDDEVR																															36.4	1	36.4	1	36.4	1
		ARVYDDEVRK	28.1	3	34.1	2					26.1	1	34.1	6	50	2	34	2	29.9	2	23.4	1	31.3	1	50	8	32	2	39.8	2	35.7	2			39.8	6	50	20
		EGPPVFEQPEmTYEK					24.5	1	37.2	1	84.9	3	84.9	5	90.1	3	58.8	3			74.9	3	65.6	2	90.1	11	67.5	2	40.8	2	58.3	2	77.9	2	77.9	8	90.1	24
		FVESLGVEK	59.1	3			43.5	1			46.4	1	59.1	5	77.7	2	48	2			64	2	64	2	77.7	8	50.1	1	33.5	1	45.5	2	63.3	1	63.3	5	77.7	18
		FYWAPTREDR	25.8	1									25.8	1	30.3	2	37	1					27.1	1	37	4					21.2	1			21.2	1	37	6
		GLAYDTSDDQQDITR	99.6	4	77.4	3	106	4	99.5	1	83.8	2	106	14	92.6	4	102	4	103	4	97.7	4	108	2	108	18	102	6	90.9	4	106	4	75.4	4	106	18	108	50
		GLAYDTSDDQQDITRGK													78.3	1	31.4	2					71.4	2	78.3	5	18	1	48.2	2	68.1	2	31.8	2	68.1	7	78.3	12
		GTFYGKTEEKEPSK													41.8	1	21.6	1					30.8	2	41.8	4					27.4	2			27.4	2	41.8	6
		IKDEDIVTLVDQFPGQSIDFFGALR	39.1	1									39.1	1																							39.1	1
		KFVESLGVEK					40.8	1			39.7	1	40.8	2	54.3	2	51.5	4	24.4	1	38	2	54.8	2	54.8	11					58.3	2	42.4	1	58.3	3	58.3	16
		LmEYGNmLVmEQENVKR															30.5	1							30.5	1											30.5	1
		mccLFINDLDAGAGR	80.3	1			94.4	1					94.4	2	89.3	1	54.9	1					89.5	3	89.5	5					111	2	53.2	2	111	4	111	11
		mGINPIMmSAGELESGNAGEPAK	78.2	5			60.2	2					78.2	7	120	8	87.2	3	80.1	3			87.4	4	120	18	101	8	59.6	6	90.1	3	46.5	3	101	20	120	45
		mGINPImmSAGELESGNAGEPAKLIR																					47.2	1	47.2	1											47.2	1
		NFLTLPNIK													23.2	1									23.2	1											23.2	1
		SFQcELVmAK	54	4			56.2	3					56.2	7	49.4	2	50.8	5	35.9	2	59.2	2	59.1	3	59.2	14	56.3	4	47.4	6	62.3	4	43.7	1	62.3	15	62.3	36
		VPIIcTGNDFSTLYAPLIR																					46.5	1	46.5	1											46.5	1
		VPLILGIWGGK													41.4	1	36.2	1					23.5	1	41.4	3					25.9	1			25.9	1	41.4	4
		VPLILGIWGGKGQGK															24.7	1							24.7	1											24.7	1
		VQLAETYLSQAALGDANADAIGR													131	2	61.7	1	91	2			70.9	2	131	7	99.7	1			85	1			99.7	2	131	9
		VYDDEVR	29	2									29	2	28.9	1	31.3	1							31.3	2	29.3	3							29.3	3	31.3	7
		VYDDEVRK					23.6	1			31.6	1	31.6	2	38.4	4	28.7	3	34.8	4	25.1	1	39.3	3	39.3	15	33.6	2	33	3	38	5			38	10	39.3	27
		VYDDEVRKFVESLGVEK																													46	1			46	1	46	1
		YREAADLIK	38.7	2			23.3	1			45.6	1	45.6	4	45.4	2	29	2					35.7	1	45.4	5	45.6	2			41	2	37.4	1	45.6	5	45.6	14
		YREAADLIKK	44.2	3							28	1	44.2	4	39	2	44.2	2	27.3	3			26.3	1	44.2	8	34.5	3	35.3	4	34.2	2			35.3	9	44.2	21
AT2G41680.1	NTRC NADPH-dependent thioredoxin reductase C chr2:17376349-17379028 REVERSE LENGTH=529	HKGQYALR																	26.2	1					26.2	1											26.2	1
		KLYHESPR	21.3	1	22.8	1							22.8	2															30.9	1					30.9	1	30.9	3
		LYHESPR			24.5	1							24.5	1																							24.5	1
		RLDTGEETELEAK					26.3	1					26.3	1									34.6	1	34.6	1											34.6	2
AT2G42500.1,AT2G42500.2,AT3G58500.1	PP2A-3 protein phosphatase 2A-3 chr2:17698099-17701226 REVERSE LENGTH=313	RGEPDVTR					36	1					36	1					21.6	1			46.8	1	46.8	2					44.9	1	29	1	44.9	2	46.8	5
		RGEPDVTRR	21.6	1			27.8	1					27.8	2									20.2	1	20.2	1					26.2	1			26.2	1	27.8	4
AT2G43030.1	Ribosomal protein L3 family protein chr2:17894898-17895713 FORWARD LENGTH=271	ALGSIGAGTTPGR	61.6	1							37.1	1	61.6	2	40	1							71.3	1	71.3	2	53.1	1			63.9	1			63.9	2	71.3	6
		IVGVNIPKN	48	1									48	1							27.2	1			27.2	1			29	1					29	1	48	3
AT2G45220.1	Plant invertase/pectin methylesterase inhibitor superfamily chr2:18644281-18646394 REVERSE LENGTH=511	DNAVVAKDGSGNFK									46.7	1	46.7	1																							46.7	1
		EAIDAASGSGR									79.4	1	79.4	1																							79.4	1
		GITFRNTAGASNEQAVALR									33.4	1	33.4	1																							33.4	1
		NTAGASNEQAVALR									87.3	1	87.3	1	85.3	1									85.3	1											87.3	2
		NVMLRGDGIGK									33.9	2	33.9	2																							33.9	2
		QGVYSENLEIR									71.7	1	71.7	1																							71.7	1
		SDPNQNTGIIIHNSR									91.7	1	91.7	1																							91.7	1
		SKTNTITAQGR									60.5	2	60.5	2																							60.5	2
		SVGGGTTTFNSATVAAVGDGFIAR									133	4	133	4																							133	4
		TIITGSK									44.7	1	44.7	1																							44.7	1
		TLFYAEFQNTGPGASTSGR									114	1	114	1																							114	1
		TNTITAQGR									62	1	62	1																							62	1
		VLGSASEASK									30.6	1	30.6	1																							30.6	1
		VTAASDLRPVLGSTK									108	2	108	2	54.2	1									54.2	1											108	3
AT2G45960.1,AT2G45960.2,AT2G45960.3	PIP1B, TMP-A, ATHH2, PIP1;2 plasma membrane intrinsic protein 1B chr2:18910450-18911703 FORWARD LENGTH=286	QYQALGGGANTIAHGYTK													33.9	1	29.3	1					24.2	1	33.9	3			30.7	2					30.7	2	33.9	5
		VGANKFPER													28.4	2					24.4	1			28.4	3											28.4	3
AT2G47510.1,AT2G47510.2,AT5G50950.1,AT5G50950.2,AT5G50950.3	FUM1 fumarase 1 chr2:19498614-19502020 FORWARD LENGTH=492	AFGVLKK					24.4	1					24.4	1																							24.4	1
		IANDIR																											27.8	1					27.8	1	27.8	1
		IGYDNAAAVAK					50.8	1					50.8	1																			58.3	1	58.3	1	58.3	2
AT2G47610.1,AT3G62870.1	Ribosomal protein L7Ae/L30e/S12e/Gadd45 family protein chr2:19529854-19531401 FORWARD LENGTH=257	TLDKNLATSLFK													45.3	1							31.5	1	45.3	2											45.3	2
		VIAKEAAQRmN																					31.8	1	31.8	1					40.6	1			40.6	1	40.6	2
AT2G47730.1	ATGSTF8, ATGSTF5, GST6, GSTF8 glutathione S-transferase phi 8 chr2:19558213-19559266 FORWARD LENGTH=263	AITQYLAEEYSEKGEK													76.8	1									76.8	1	44.7	1			57.1	1			57.1	2	76.8	3
		VIDLQKQ	41.2	1									41.2	1					35.2	1					35.2	1											41.2	2
		VLDVYEAR	47	1									47	1																	28.3	1			28.3	1	47	2
		VLFDSRPK	38.7	1									38.7	1																							38.7	1
AT3G01500.1,AT3G01500.2,AT3G01500.3	CA1, ATBCA1, SABP3, ATSABP3 carbonic anhydrase 1 chr3:194853-196716 REVERSE LENGTH=270	AFDPVETIK	60	2			37.1	1					60	3					45.4	1			38.3	1	45.4	2	50.7	1	44.1	2					50.7	3	60	8
		AFDPVETIKQGFIK	32.8	1			62.3	1					62.3	2									61.7	1	61.7	1					59.1	1			59.1	1	62.3	4
		EAVNVSLANLLTYPFVR	58.1	1									58.1	1	81	1									81	1	41.2	1			58.7	1			58.7	2	81	4
		EGLVKGTLALK					25	1					25	1																							25	1
		EKYETNPALYGELAK	57.9	2			55.3	2			80.7	1	80.7	5	74.9	2	63.6	3	30	3	23.5	1	60	2	74.9	11	83.8	1	62.6	3	84.3	3			84.3	7	84.3	23
		EKYETNPALYGELAKGQSPK	57.7	2	19.4	1	50.6	1					57.7	4			50.6	1					46.9	1	50.6	2	48.1	1	54.4	1	48.8	1			54.4	3	57.7	9
		GTLALKGGYYDFVK																					22.3	1	22.3	1					39.7	1			39.7	1	39.7	2
		IcLPAK	27.7	1									27.7	1																							27.7	1
		NIANMVPPFDK	35	1			50.1	1					50.1	2													39.1	2							39.1	2	50.1	4
		NIANMVPPFDKVK	53.2	2			60.2	3					60.2	5	53.6	2	37.4	2							53.6	4	34.2	1	33	1					34.2	2	60.2	11
		SKVISELGDSAFEDQcGR					38.3	1					38.3	1																							38.3	1
		VcPSHVLDFQPGDAFVVR					48.7	1					48.7	1			32.3	1			22.8	1	45.5	1	45.5	3	35.5	1			46	1			46	2	48.7	6
		VENIVVIGHSAcGGIK					23.5	1					23.5	1																							23.5	1
		VISELGDSAFEDQcGR	88.4	1			97.2	1					97.2	2	102	1							71.8	1	102	2	55.3	1			103	1			103	2	103	6
		VISELGDSAFEDQcGRcER					41.5	1					41.5	1									19.9	1	19.9	1											41.5	2
		YETNPALYGELAK	46.5	2			44.4	1			40.1	1	46.5	4	31.3	1							70.5	1	70.5	2	32.7	1			84.3	1	30	1	84.3	3	84.3	9
		YETNPALYGELAKGQSPK					32.2	1					32.2	1																							32.2	1
		YmVFAcSDSR	50.1	1			47.2	1					50.1	2	25.5	1							47.6	1	47.6	2					50.2	1			50.2	1	50.2	5
AT3G03250.1	UGP, UGP1, AtUGP1 UDP-GLUCOSE PYROPHOSPHORYLASE 1 chr3:749761-754014 REVERSE LENGTH=469	mTPVSQDVAETK													41	1									41	1											41	1
		VVADEFVPWPSK													33.9	1									33.9	1			28.9	1					28.9	1	33.9	2
AT3G04120.1	GAPC, GAPC-1, GAPC1 glyceraldehyde-3-phosphate dehydrogenase C subunit 1 chr3:1081077-1083131 FORWARD LENGTH=338	AASFNIIPSSTGAAK	49.7	3	49.8	2	28.5	1			63.8	2	63.8	8	66.3	3	51.7	5	59.7	2			68.4	3	68.4	13	58.5	5	44.8	2	62.9	4	58.4	1	62.9	12	68.4	33
		AATYDEIKK																					27.2	1	27.2	1											27.2	1
		AGIALSDKFVK			62.6	1	30.2	1					62.6	2	63	2	83.3	4	60.8	3			80.6	3	83.3	12	82.4	3	74.7	2	81	2	31.3	1	82.4	8	83.3	22
		AIKEESEGKLK	45.5	2			27.8	1					45.5	3			28	1	22.4	1			37.6	2	37.6	4					31.7	2			31.7	2	45.5	9
		AVGKVLPALNGK																					46.3	1	46.3	1					30.1	1			30.1	1	46.3	2
		FGIVEGLmTTVHSITATQK															37.8	1							37.8	1											37.8	1
		GILGYTEDDVVSTDFVGDNR					34.1	1					34.1	1	75.4	1	83.3	1					70.7	2	83.3	4											83.3	5
		IGINGFGR	50.1	2	44.3	1	55.4	1					55.4	4			48.7	2	47.4	1			53.8	1	53.8	4	47	2	47.8	2			32.5	1	47.8	5	55.4	13
		IRIGINGFGR																					18.5	1	18.5	1											18.5	1
		KVVISAPSK					30.9	1					30.9	1									40.7	1	40.7	1											40.7	2
		LVSWYDNEWGYSSR					53.5	1					53.5	1	99.2	2	51.2	1					86.3	1	99.2	4					69.2	1			69.2	1	99.2	6
		SSIFDAK																	22.9	1					22.9	1					39.5	1			39.5	1	39.5	2
		TVDGPSmKDWR	17.9	1	18	1	24.9	1					24.9	3					27.7	2			35.8	1	35.8	3	20.4	1			40.3	2			40.3	3	40.3	9
		VINDRFGIVEGLmTTVHSITATQK					27.8	1					27.8	1																							27.8	1
		VVDLIVHmSK																											33.4	1	21.8	1			33.4	2	33.4	2
		VVDLIVHmSKA	62.1	1			60.4	1					62.1	2	38.9	1	59.9	3	32.3	1			63.1	2	63.1	7	54.1	4	39	2	62.7	3	28.1	1	62.7	10	63.1	19
AT3G04790.1	Ribose 5-phosphate isomerase, type A protein chr3:1313365-1314195 FORWARD LENGTH=276	SLGIPLVGLDTHPR					37	1					37	1	32.5	1							31	1	32.5	2	38.2	1			41.3	1			41.3	2	41.3	5
		TPLKDGFAAAK													19.5	1									19.5	1											19.5	1
AT3G05590.1,AT5G27850.1	RPL18 ribosomal protein L18 chr3:1621511-1622775 FORWARD LENGTH=187	APLGQNTVLLR	88.5	1									88.5	1	70.4	1									70.4	1											88.5	2
		GIDLIAGGK	61	1									61	1																							61	1
AT3G06650.1	ACLB-1 ATP-citrate lyase B-1 chr3:2079247-2082633 REVERSE LENGTH=608	FGGAIDDAAR	27.4	1	34.4	1	49.2	1					49.2	3													34	1							34	1	49.2	4
		LYRPGSVGFVSK					33.1	2					33.1	2																							33.1	2
		NTQALFYNYK																													27.9	1			27.9	1	27.9	1
		SGGmSNEmYNTIAR																													58.4	1			58.4	1	58.4	1
AT3G07850.1,AT3G14040.1	Pectin lyase-like superfamily protein chr3:2505813-2507438 REVERSE LENGTH=444	LVPAAcTEVAKPGP									35.2	1	35.2	1																							35.2	1
		NAATAVGGAAASVGAK									101	1	101	1																							101	1
AT3G08580.1,AT3G08580.2	AAC1 ADP/ATP carrier 1 chr3:2605706-2607030 REVERSE LENGTH=381	GAGANILR													23.6	1					53.3	1			53.3	2							44	1	44	1	53.3	3
		LLIQNQDEmIK	47.9	1			62.1	1			56.3	2	62.1	4	69.6	5	49.9	1			54.3	1	72.4	1	72.4	8	33.1	1			48.6	2			48.6	3	72.4	15
		LLIQNQDEmIKAGR					45.2	1					45.2	1							31.9	1	41.6	2	41.6	3			24.4	1	43.9	1	30.9	2	43.9	4	45.2	8
		LSEPYKGIGDcFGR					37.6	1					37.6	1							48.8	1	54	2	54	3					64.8	1	44	1	64.8	2	64.8	6
		mmmTSGEAVK																			45.5	2			45.5	2							29.2	1	29.2	1	45.5	3
		mmmTSGEAVKYK					22	1					22	1									38.5	1	38.5	1											38.5	2
		QFDGLVDVYR																					39.9	1	39.9	1					46.2	1			46.2	1	46.2	2
		QFDGLVDVYRK													30.9	2							47.6	1	47.6	3											47.6	3
		SLFKGAGANILR					26.8	1					26.8	1									51	2	51	2					59.1	1			59.1	1	59.1	4
		SSLDAFKQILK																					24.9	1	24.9	1					33.3	1			33.3	1	33.3	2
		SSLDAFKQILKNEGAK															34	1							34	1					31	1	33.8	1	33.8	2	34	3
		TAAAPIER	35.3	1			35.1	1			27.2	1	35.3	3	40.1	2	25.5	1			41	1	41.3	1	41.3	5	32.4	2	27.5	1	32	1	40.5	1	40.5	5	41.3	13
		TAAAPIERVK																					25.9	1	25.9	1											25.9	1
		TDGIAGLYR																			27.7	1			27.7	1					20.2	1			20.2	1	27.7	2
		TIKDEGFGSLWR	50	1			38.6	1					50	2	57.7	3	63.2	2					57.1	2	63.2	7	65.2	2	40.7	2	59.5	3	40.3	2	65.2	9	65.2	18
		VKLLIQNQDEmIK					23.7	1					23.7	1									56.4	1	56.4	1											56.4	2
		VKLLIQNQDEmIKAGR					47.5	1					47.5	1									63.8	2	63.8	2					59.6	4			59.6	4	63.8	7
		YKSSLDAFK																			21.6	1			21.6	1											21.6	1
AT3G08940.2	LHCB4.2 light harvesting complex photosystem II chr3:2717717-2718665 FORWARD LENGTH=287	AQLQLAEIK	57.4	1									57.4	1	49.5	1					37.7	1			49.5	2							30.8	1	30.8	1	57.4	4
		FFDPLGLASDPVK	48.8	1									48.8	1			40.9	1							40.9	1											48.8	2
		FFDPLGLASDPVKK	48.7	1			21.9	1	20	1			48.7	3	67.2	2	35.5	2					32.1	1	67.2	5	28.1	2	21.7	1	45.3	2			45.3	5	67.2	13
		NAELDSEKR	39.2	4									39.2	4	42.8	2									42.8	2	33.5	1							33.5	1	42.8	7
		NLYGEVIGTR	63.4	1			27.8	1					63.4	2									34.5	1	34.5	1	48.7	1			50.6	1	27.6	1	50.6	3	63.4	6
		NLYGEVIGTRTEAVDPK	24.6	1									24.6	1	30.2	1							42.1	1	42.1	2	36	1			33.5	1			36	2	42.1	5
		RLYPGGK					31.2	1					31.2	1									28.3	1	28.3	1	24.1	1			31.4	1			31.4	2	31.4	4
		STPFQPYSEVFGLQR	81.7	1			82.3	1	46.8	1	44.4	1	82.3	4	74.9	3	79.9	1			24	1	63.5	2	79.9	7	93.9	1	24.1	1	71.7	2	35.9	1	93.9	5	93.9	16
		TVISDRPLWFPGAK	29.1	1									29.1	1	39.3	1							40.5	1	40.5	2	29.7	1							29.7	1	40.5	4
AT3G09200.1	Ribosomal protein L10 family protein chr3:2823364-2825020 REVERSE LENGTH=320	FAVASVAAVSADAGGGAPAAAK							58.2	1			58.2	1																							58.2	1
		GDLKEVSEEVAK																					27.8	1	27.8	1											27.8	1
		GLRGDSVVLmGK																					35	1	35	1											35	1
		GTVEIITPVELIK															30	1							30	1			32.6	1					32.6	1	32.6	2
AT3G09260.1	PYK10, PSR3.1, BGLU23, LEB Glycosyl hydrolase superfamily protein chr3:2840657-2843730 REVERSE LENGTH=524	DIVGHRLPK							20.7	1			20.7	1							23.7	1			23.7	1											23.7	2
		FGLYYVDFK							47.4	1			47.4	1																							47.4	1
		IGIAHSPAWFEAHDLADSQDGASIDR							28.2	1			28.2	1																			42	1	42	1	42	2
		KYYLQR							32.2	1			32.2	1																							32.2	1
		mSIAWPR							37.6	2			37.6	2																							37.6	2
		NAQNYAIGSKPLTAALNVYSR							52.4	1			52.4	1																			62.8	1	62.8	1	62.8	2
		NLNTDAFR							49	1			49	1							45.1	2			45.1	2							39.7	2	39.7	2	49	5
		WMQDSLITWESK							68.9	2			68.9	2																			44.1	1	44.1	1	68.9	3
		YKEDIQLMK							47	3			47	3							54	6			54	6							34.4	3	34.4	3	54	12
		YYKDFLSQGVRPSALK							31.6	1			31.6	1																							31.6	1
		YYLQR							28	1			28	1																			22.9	1	22.9	1	28	2
AT3G09440.1,AT3G09440.2	Heat shock protein 70 (Hsp 70) family protein chr3:2903434-2905632 REVERSE LENGTH=649	ATAGDTHLGGEDFDNR							53.4	2			53.4	2	45.6	1									45.6	1					18.8	1			18.8	1	53.4	4
		DAGVIAGLNVMR							78	2			78	2	48.5	2							58.9	1	58.9	3	78.9	2			24.8	1			78.9	3	78.9	8
		IINEPTAAAIAYGLDK							50.1	1			50.1	1	52.3	3							135	1	135	4	74	2			29.2	1			74	3	135	8
		IINEPTAAAIAYGLDKK							29	1			29	1	35.2	1									35.2	1					23.3	1			23.3	1	35.2	3
		LSKDEIEK													27.2	1									27.2	1	24.5	1							24.5	1	27.2	2
		MVNHFVQEFK							39.4	2			39.4	2																							39.4	2
		NALENYAYNmR							68.9	2			68.9	2	62.7	2									62.7	2	65.5	1			80.6	1			80.6	2	80.6	6
		NAVVTVPAYFNDSQR							55.4	2			55.4	2	33.3	1							49.1	2	49.1	3	58.6	1			45.5	1			58.6	2	58.6	7
		NKITITNDKGR																					37.5	1	37.5	1											37.5	1
		NKKDISGNPR													25	1									25	1					26.1	1			26.1	1	26.1	2
		NQVAmNPINTVFDAK							54.9	1			54.9	1									43.4	1	43.4	1											54.9	2
		NQVAmNPINTVFDAKR							22.9	1			22.9	1																							22.9	1
		NTIRDEKIGEK																									21.4	1							21.4	1	21.4	1
		NVLIFDLGGGTFDVSLLTIEEGIFEVK																					39.2	4	39.2	4											39.2	4
		TTPSYVAFTDSER							85.6	1			85.6	1	90.7	1									90.7	1					67.9	2			67.9	2	90.7	4
AT3G09630.1	Ribosomal protein L4/L1 family chr3:2953813-2955444 FORWARD LENGTH=406	AGQAAFGNmcR																					34.1	1	34.1	1					37.8	1			37.8	1	37.8	2
		mSLLAEAQR													38.3	1									38.3	1											38.3	1
		RVNVNmKR																													22.3	1			22.3	1	22.3	1
		TVTKEEALAIK																													27.7	1			27.7	1	27.7	1
AT3G11130.1	Clathrin, heavy chain chr3:3482575-3491667 REVERSE LENGTH=1705	ADDTTQFLEVIR													41.9	1									41.9	1											41.9	1
		GNLPGAENLVVQR													24.5	1									24.5	1											24.5	1
		LQQFQGAVDAAR													30.5	1									30.5	1											30.5	1
		TGQIKEVER															34.8	1	31.3	1					34.8	2											34.8	2
AT3G11510.1	Ribosomal protein S11 family protein chr3:3623757-3624866 REVERSE LENGTH=150	IEDVTPIPTDSTR																			54	1			54	1							34.4	1	34.4	1	54	2
		IGRIEDVTPIPTDSTR	30.3	1									30.3	1																							30.3	1
		TPGPGAQSALR	71.7	1					64.1	1			71.7	2									55.2	1	55.2	1					56.6	1			56.6	1	71.7	4
		VETVTLGPSVR							39.3	1			39.3	1							38.3	1			38.3	1	29.7	1					34.2	1	34.2	2	39.3	4
		VKADRDESSPYAAmLAAQDVAQR	21.1	1									21.1	1																							21.1	1
AT3G11630.1	Thioredoxin superfamily protein chr3:3672189-3673937 FORWARD LENGTH=266	AQADDLPLVGNK			52.7	1							52.7	1	54.2	1			49.2	1	33.5	1			54.2	3			37.5	1			30.7	1	37.5	2	54.2	6
		GLFIIDKEGVIQHSTINNLGIGR	54.5	1									54.5	1	50.5	1									50.5	1					51.2	1			51.2	1	54.5	3
		LSKEYFSAI	50	1									50	1	42.9	1			29.8	1	48	1			48	3			45.4	1			36.3	1	45.4	2	50	6
		SFGVLIHDQGIALR																													30.9	1			30.9	1	30.9	1
		SGGLGDLNYPLISDVTK	70.4	2									70.4	2	50.9	1	71.3	2							71.3	3	52.9	1	32.5	1					52.9	2	71.3	7
		SVDETMR																	34.8	1					34.8	1											34.8	1
AT3G11820.1,AT3G11820.2	SYP121, AT-SYR1, ATSYP121, SYR1, ATSYR1, PEN1 syntaxin of plants 121 chr3:3729540-3730868 REVERSE LENGTH=346	SKmDGDVGVALKK																					31.3	1	31.3	1					47.5	2			47.5	2	47.5	3
		VLDTINEIQER																													21.4	1			21.4	1	21.4	1
AT3G12145.1	FLR1, FLOR1 Leucine-rich repeat (LRR) family protein chr3:3874764-3876075 REVERSE LENGTH=325	ALGNPPLLSSWNPR													68	1									68	1											68	1
		LSGKIPESLSK													40	1									40	1											40	1
		NmFNFDLVK													45.7	1									45.7	1											45.7	1
		SIVSLDLSQNHIYGK													69.1	2									69.1	2											69.1	2
		TDccTGWTGVEcTNRR													26	1									26	1											26	1
AT3G12780.1	PGK1 phosphoglycerate kinase 1 chr3:4061127-4063140 REVERSE LENGTH=481	ADLNVPLDDNQTITDDTR	39.8	1									39.8	1	64.1	2	79	2							79	4	58.7	3							58.7	3	79	8
		AHASTEGVTK	21.8	1									21.8	1	30.9	1									30.9	1	24	1							24	1	30.9	3
		AKGVSLLLPTDVVVADKFAPDANSK															61.3	1							61.3	1					51.8	2			51.8	2	61.3	3
		FSLAPLVPR	27.1	1			35.5	3					35.5	4	46.1	1	47.3	1	29	1	34	1	50.2	2	50.2	6	44.8	2	35	1	44.6	3	50.7	1	50.7	7	50.7	17
		FYKEEEKNDPEFAK															32.8	3							32.8	3	26.2	2							26.2	2	32.8	5
		GVSLLLPTDVVVADKFAPDANSK	24.8	1									24.8	1			34.4	1							34.4	1											34.4	2
		IGVIESLLEK															32.8	1							32.8	1											32.8	1
		LASLADLYVNDAFGTAHR					38.3	1					38.3	1			58	1							58	1	55.7	1							55.7	1	58	3
		RPFAAIVGGSK					24.4	1					24.4	1			37.8	1					34	1	37.8	2	42.7	2			30.5	1			42.7	3	42.7	6
		SVGDLTSADLKGK	25.4	1									25.4	1			64.8	1							64.8	1											64.8	2
		SVGDLTSADLKGKK	30.7	1									30.7	1			38.1	1							38.1	1											38.1	2
		VILSTHLGRPK															41.7	1							41.7	1	49.4	1			53.2	1			53.2	2	53.2	3
AT3G13920.1,AT3G13920.2	EIF4A1, RH4, TIF4A1 eukaryotic translation initiation factor 4A1 chr3:4592635-4594128 REVERSE LENGTH=412	GIYAYGFEKPSAIQQR	31.3	1									31.3	1	73.1	2					22.7	1	69.1	2	73.1	5			20.5	1	31.8	1	43.8	1	43.8	3	73.1	9
		GLDVIQQAQSGTGK	120	3									120	3	89.8	1			36.3	1	81.4	1	59.7	1	89.8	4							93.1	1	93.1	1	120	8
		KFmSKPVR					32.4	2					32.4	2									25.1	1	25.1	1					24.5	2			24.5	2	32.4	5
		LNEVLEGQDEFFTSYDDVHESFDAmGLQENLLR									57.9	1	57.9	1																							57.9	1
		mFVLDEADEmLSR					29.8	1					29.8	1									83.7	1	83.7	1					29	1	42.5	1	42.5	2	83.7	4
		SRDHTVSATHGDmDQNTR													29.9	1							28.7	1	29.9	2											29.9	2
		VLITTDLLAR	53	2	67.8	3	67.5	3					67.8	8	57.5	2	55.4	4	49.7	4	36.4	1	45	2	57.5	13	59.9	4	57.4	3	72.6	3	44.1	1	72.6	11	72.6	32
AT3G13930.1	Dihydrolipoamide acetyltransferase, long form protein chr3:4596240-4600143 FORWARD LENGTH=539	GLSTIGEEVR					35.4	1					35.4	1																							35.4	1
		KLAEDNNVPLSSIKGTGPEGR					32.3	1					32.3	1																							32.3	1
AT3G14067.1	Subtilase family protein chr3:4658421-4660754 REVERSE LENGTH=777	AGDQIRDYIK					28.8	1	31.1	1	37.1	1	37.1	3	25.5	1			30	2	24.1	1	33.8	2	33.8	6			36.1	1					36.1	1	37.1	10
		AGDQIRDYIKTSDSPTAK					28.2	1					28.2	1																							28.2	1
		ISFLGTLIGPSPPSPR							68.1	1			68.1	1	69.1	2			48.1	1					69.1	3			43.6	2	63.8	1	65.6	1	65.6	4	69.1	8
		KAHPDWSPAAIK	28	2	17.2	1	24.8	1					28	4													28	1							28	1	28	5
		NVGSNVDAVYEVGVK							68.5	1			68.5	1																							68.5	1
		SPANVEIDVSPSK					69.8	1					69.8	1																							69.8	1
		SSNSFIHGAGHVDPNK					28.6	1	19.5	1			28.6	2	20.1	1									20.1	1											28.6	3
		SVLEYEVTFK							45	1			45	1																							45	1
		VAAFSSR			30.3	1							30.3	1			28.4	1							28.4	1											30.3	2
		VVKNVGSNVDAVYEVGVK							22.4	1			22.4	1																							22.4	1
AT3G14210.1	ESM1 epithiospecifier modifier 1 chr3:4729886-4731562 FORWARD LENGTH=392	AQEEmAHLLYGADPDVVQPmTVR							53.8	1			53.8	1							51.4	1			51.4	1							70.5	1	70.5	1	70.5	3
		DLPQTYWPYGK							63	1			63	1	49.2	2					58.3	1			58.3	3							61.4	1	61.4	1	63	5
		ELIVYPTGETmR													55.9	1					31.1	1			55.9	2											55.9	2
		IGPmLNEFAK							58.7	1			58.7	1	58.1	2					59.8	2			59.8	4							64	2	64	2	64	7
		KDLPQTYWPYGK							55.8	1			55.8	1	45.5	1					63.6	1			63.6	2							63.8	1	63.8	1	63.8	4
		LcEYQR							24.5	1			24.5	1	34.4	1									34.4	1											34.4	2
		SRDYPNGK							34.8	1			34.8	1																							34.8	1
		TGNEcYELLNDLAK							45.1	1			45.1	1	92.1	1					54.9	1			92.1	2							53.8	1	53.8	1	92.1	4
AT3G14310.1	ATPME3, PME3 pectin methylesterase 3 chr3:4772214-4775095 REVERSE LENGTH=592	ADATVAADGSGTFK													58.8	1									58.8	1											58.8	1
		AGVYRENVEVAK													32.9	1									32.9	1											32.9	1
		DITFQNTAGPSK													54	1									54	1											54	1
		IGATSDLQSVK	36.1	1							42.7	1	42.7	2			39.1	1	25.9	1	37.4	1			39.1	3					48.6	1	45.5	1	48.6	2	48.6	7
		NmVTAQGR																															24.2	1	24.2	1	24.2	1
		NVVDGSTTFHSATVAAVGER							23.9	1			23.9	1	21.1	1									21.1	1											23.9	2
		TDPNQNTGIVIQK	58.9	1							31.5	1	58.9	2																			33.7	1	33.7	1	58.9	3
		TVAAAVAAAPENSNKR													64	2									64	2											64	2
AT3G14420.1,AT3G14420.2,AT3G14420.4	Aldolase-type TIM barrel family protein chr3:4821804-4823899 FORWARD LENGTH=367	AIALTVDTPR	74.2	3	32.7	1	48.2	1			68.5	2	74.2	7	62	1	61	1					49.4	1	62	3			36.2	1	64.8	2			64.8	3	74.2	13
		FFQLYVYK													25.7	1	38.1	1							38.1	2											38.1	2
		FTLPPNLTLK	24.1	1			27.2	1					27.2	2			27.8	1							27.8	1	23.1	1							23.1	1	27.8	4
		GVLTGEDAR	31.1	1									31.1	1																							31.1	1
		IAIQAGAAGIIVSNHGAR																					22	1	22	1											22	1
		ILFRPR					40	1					40	1									36.1	1	36.1	1	35.1	1			33.1	1			35.1	2	40	4
		IPVFLDGGVR	33.6	2			30.5	1					33.6	3			34	2	32.2	1			40.2	1	40.2	4	39.9	2	32.3	1					39.9	3	40.2	10
		mAHPDGEYATAR	24.2	1	23.6	1	58.5	1					58.5	3	39.3	3	60	3	33.8	1			55.7	1	60	8	35.3	2	31	2	37.1	2			37.1	6	60	17
		SLKEISR	41.4	1			32.5	1					41.4	2			28.5	1					24.3	1	28.5	2			34.5	1					34.5	1	41.4	5
AT3G14990.1,AT3G14990.2,AT3G14990.3	Class I glutamine amidotransferase-like superfamily protein chr3:5047510-5049621 FORWARD LENGTH=392	ATGYPVFMEK													30.8	1									30.8	1											30.8	1
		LAATcATAVESR													93.9	1	34.7	1							93.9	2	67.5	1	83.1	1					83.1	2	93.9	4
		VVVDGNVITSR													43.4	1									43.4	1											43.4	1
AT3G16390.1,AT3G16400.1,AT3G16400.2,AT3G16410.1	NSP3 nitrile specifier protein 3 chr3:5562602-5564356 FORWARD LENGTH=467	GGAGLEVVQGK									44.4	1	44.4	1																							44.4	1
		LLTPVEEGPTPR									34.7	1	34.7	1																							34.7	1
AT3G16420.1,AT3G16420.2,AT3G16420.3	PBP1, JAL30 PYK10-binding protein 1 chr3:5579560-5580674 FORWARD LENGTH=298	FVYDKSPEEVTGEEHGK																			48.9	1			48.9	1							46.6	2	46.6	2	48.9	3
		GANLWDDGSTHDAVTK																															21.1	1	21.1	1	21.1	1
		KVYVGQAQDGISAVK																			50.4	1			50.4	1							52.2	1	52.2	1	52.2	2
		NGQPEQAPLRGTK																			34	1			34	1											34	1
		VYVGQAQDGISAVK							70.9	2			70.9	2																							70.9	2
AT3G16460.1,AT3G16460.2	Mannose-binding lectin superfamily protein chr3:5593029-5595522 FORWARD LENGTH=705	FGVHVAPITK							42.6	1			42.6	1																							42.6	1
		IYASYGGEGIQYVK							55.5	2			55.5	2																							55.5	2
		LTAEGGETGAVWDDGSHDDVKK							25.3	2			25.3	2																							25.3	2
		SGFQISAPEATGK							61.1	1			61.1	1																							61.1	1
		SSTTPVPSTPLK																															31	1	31	1	31	1
		VYVGQGQDGVAAVK							92.4	1			92.4	1																			49.7	1	49.7	1	92.4	2
AT3G16470.1,AT3G16470.2	JR1 Mannose-binding lectin superfamily protein chr3:5596096-5597709 REVERSE LENGTH=451	ASKPVLGSDHGKK							19.4	1			19.4	1																							19.4	1
		GGEEWDDGGAYENVKK																			36.5	1			36.5	1											36.5	1
		LGVNVAPIAK																			53.4	1			53.4	1											53.4	1
		TSQPFGLTSGEEAELGGGK																			52.9	1			52.9	1							70.7	1	70.7	1	70.7	2
AT3G16640.1	TCTP translationally controlled tumor protein chr3:5669709-5670729 REVERSE LENGTH=168	GIEGATKFLLPR	37.9	1									37.9	1									37.5	1	37.5	1											37.9	2
		LQEQPTYDKK	26	1									26	1																							26	1
		VVDIVDTFR	37.5	1			32.6	1					37.5	2									40.1	1	40.1	1	39.5	1	28.8	1	33.1	1			39.5	3	40.1	6
AT3G16950.1,AT3G16950.2,AT4G16155.1	LPD1, ptlpd1 lipoamide dehydrogenase 1 chr3:5786761-5790383 REVERSE LENGTH=570	ALAENEGEGIAK	30.5	1	29	1	41.4	1					41.4	3	42.5	1	25	1	69.9	1			26.9	1	69.9	4	46.1	2	48.9	1	38.5	1			48.9	4	69.9	11
		DGKPVLIELIDAK																											35.2	1					35.2	1	35.2	1
AT3G17390.1	MTO3, SAMS3, MAT4 S-adenosylmethionine synthetase family protein chr3:5952484-5953665 REVERSE LENGTH=393	ANVDYEQIVR	76.5	1	40.8	1	65.4	2					76.5	4			53.8	2	26.2	1	48.2	1			53.8	4	54	2					48.5	1	54	3	76.5	11
		FVIGGPHGDAGLTGR	42.3	1	29.3	1	71.1	2					71.1	4			40.6	1					41.6	1	41.6	2					77.5	3			77.5	3	77.5	9
		FVIGGPHGDAGLTGRK					38	1					38	1									31.9	1	31.9	1											38	2
		SGAYIVR	44.1	1			61.4	1					61.4	2									38.3	1	38.3	1											61.4	3
		SIVASGLAR	30.6	1									30.6	1																							30.6	1
		TIFHLNPSGR					35.5	1					35.5	1									29.2	1	29.2	1							30.4	1	30.4	1	35.5	3
AT3G18080.1	BGLU44 B-S glucosidase 44 chr3:6191586-6194124 FORWARD LENGTH=512	ADNLAAQR							46	1			46	1							47.3	1			47.3	1							47.4	1	47.4	1	47.4	3
		FGIVYVDYK							28.8	1			28.8	1																							28.8	1
		NKLHTGGLSR													34.9	1									34.9	1											34.9	1
		VVAALGYDNGIFAPGR							87.1	3			87.1	3	59.1	2					52.6	1			59.1	3							95.6	1	95.6	1	95.6	7
		YKEDVDLMK													27.4	1									27.4	1											27.4	1
AT3G20820.1	Leucine-rich repeat (LRR) family protein chr3:7280930-7282027 FORWARD LENGTH=365	ALLAFR							25.6	1			25.6	1																							25.6	1
		IPESLTNIYR							48	1			48	1																							48	1
		LAVLNVADNR	33.9	1			64.1	1	75.1	1	69.3	1	75.1	4	27	1					86.1	1			86.1	2							71.7	1	71.7	1	86.1	7
		LAVLNVADNRISGSIPK																															36.8	1	36.8	1	36.8	1
		LSAITIADWK													59.1	3									59.1	3											59.1	3
		NLLQGKIPEGFGPR					57.2	1					57.2	1																			19.7	1	19.7	1	57.2	2
		NNLISGVIPSDVGR																															60.2	1	60.2	1	60.2	1
		VADINLRGESEDPIFER							28.5	1			28.5	1							26.6	1			26.6	1							28.3	1	28.3	1	28.5	3
AT3G23400.1	FIB4 Plastid-lipid associated protein PAP / fibrillin family protein chr3:8376636-8378225 REVERSE LENGTH=284	LIPVTLGQVFQR	38.3	1									38.3	1	61.3	1	38.6	1							61.3	2											61.3	3
		LLSVVSGLNR													29.5	1							42	1	42	2	45.8	1							45.8	1	45.8	3
		LLYSSAFSSR																					31.9	1	31.9	1	43	1			35.7	1			43	2	43	3
		TSGNLSQIPPFDIPR													57.9	1									57.9	1											57.9	1
AT3G26650.1	GAPA, GAPA-1 glyceraldehyde 3-phosphate dehydrogenase A subunit chr3:9795226-9796848 FORWARD LENGTH=396	AAALNIVPTSTGAAK	93.7	3	81.3	3	98.4	3	75.3	2	102	4	102	15	95.7	3	83	4	70.5	2	77.4	4	69.2	4	95.7	17	83	5	67.1	4	77.4	4	98.2	4	98.2	17	102	49
		ARAAALNIVPTSTGAAK	30.4	1			104	2					104	3	66.2	1	37.3	1			32	2	109	3	109	7	42.4	2	60.8	1	102	2	28.5	2	102	7	109	17
		AVALVLPNLK	79.7	4	68.2	2	40.9	1			44.5	1	79.7	8	46	3	80.2	3	72.7	4	54.5	2	76.8	3	80.2	15	73.5	5	76.7	4	80	4	48.8	2	80	15	80.2	38
		AVALVLPNLKGK					60.7	2					60.7	2			49.9	2			35.9	1	51.3	2	51.3	5	44.8	1	55.4	1	47.8	3	36.3	1	55.4	6	60.7	13
		AVALVLPNLKGKLNGIALR					36.7	1					36.7	1																							36.7	1
		DSAEKELK	25.8	1									25.8	1	46.5	1									46.5	1							35.5	1	35.5	1	46.5	3
		DSPLDIIAINDTGGVK	63.9	1									63.9	1	87.2	2	69.1	1			45.5	1	46.9	1	87.2	5	54.9	2	37.9	2			63.5	1	63.5	5	87.2	11
		FGIIKGTmTTTHSYTGDQR					33.8	1					33.8	1									39.3	1	39.3	1					22	1	23.3	1	23.3	2	39.3	4
		GTmTTTHSYTGDQR	34.9	1			56.3	2			31.3	2	56.3	5	58.9	5	60.4	4			32.7	1	81.2	3	81.2	13	38.4	3	36.3	2	50.2	4	34.7	3	50.2	12	81.2	30
		IIQVVSNR															23.5	1							23.5	1											23.5	1
		KDSPLDIIAINDTGGVK																									24.4	1							24.4	1	24.4	1
		KTFAEEVNAAFR					40	1					40	1																							40	1
		LLDASHR			26	1							26	1	50	2	33.2	1	44.1	2	45	2			50	7	44.3	2	24.3	1	32.2	1	52.4	1	52.4	5	52.4	13
		LLDASHRDLRR															20.9	1							20.9	1	20.7	1			20.2	1	21.5	1	21.5	3	21.5	4
		TFAEEVNAAFR													62	2	74	2	43.8	1			59.1	1	74	6	55.8	1	47.5	1	64.5	1			64.5	3	74	9
		TFAEEVNAAFRDSAEKELK																													24.6	1			24.6	1	24.6	1
		VIAWYDNEWGYSQR					26.9	1					26.9	1	83.9	3	78.4	1					78.8	1	83.9	5											83.9	6
		VLDQKFGIIK	41.2	1	37.7	2					27.8	1	41.2	4	49	2	49.3	4	43.4	3			45.9	1	49.3	10	41.3	2	47.4	3	46.3	3			47.4	8	49.3	22
		VLDQKFGIIKGTmTTTHSYTGDQR																					24.4	1	24.4	1											24.4	1
		VPTPNVSVVDLVVQVSK					46.5	1					46.5	1																							46.5	1
		VPTPNVSVVDLVVQVSKK	22	1			52.4	1					52.4	2																							52.4	2
		VVDLADIVANNWK	72.8	1	21.1	1	38.5	1					72.8	3	44.3	1	79.9	1					39	2	79.9	4	62.9	2			85.6	5	71.8	1	85.6	8	85.6	15
AT3G44100.1	MD-2-related lipid recognition domain-containing protein chr3:15866162-15867273 REVERSE LENGTH=152	IFGSTGEDISGGK													74.2	1									74.2	1											74.2	1
		ISPDPVVSGAAATFK													75.2	1									75.2	1											75.2	1
AT3G44300.1	NIT2, AtNIT2 nitrilase 2 chr3:15983351-15985172 FORWARD LENGTH=339	cIWGQGDGSTIPVYDTPIGK													96.7	1									96.7	1											96.7	1
		FGLGVGVHNEEGRDEFR													42.3	1									42.3	1											42.3	1
		FGLGVGVHNEEGRDEFRK													31.9	2									31.9	2											31.9	2
		GSELVVFPEAFIGGYPR													105	1									105	1											105	1
		KLmPTSLER													47.7	1									47.7	1											47.7	1
		LGAAIcWENR													56.3	1									56.3	1											56.3	1
		YHASAIKVPGPEVEK													69.5	2									69.5	2											69.5	2
AT3G44310.1,AT3G44310.3	NIT1, ATNIT1, NITI nitrilase 1 chr3:15986901-15988841 FORWARD LENGTH=346	cIWGQGDGSTIPVYDTPIGK													96.7	1									96.7	1											96.7	1
		FGLAVGVHNEEGRDEFR							27.6	2	33.5	2	33.5	4																							33.5	4
		GAELVLFPEGFIGGYPR					69.8	1					69.8	1	90.4	3	28.2	1							90.4	4					76.8	1			76.8	1	90.4	6
		KLmPTSLER			24.5	1	34.9	1					34.9	2	47.7	1			28.6	1			29	1	47.7	3	26.2	1	28.7	1	42.7	1			42.7	3	47.7	8
		KNHVYLVMGAIEK							19.2	1	27.8	1	27.8	2																							27.8	2
		LGAAIcWENR							46.3	2	36.6	1	46.3	3	56.3	1									56.3	1											56.3	4
		LGAAIcWENRMPLYR							19.7	1			19.7	1																							19.7	1
		SVTFVTKVEK													42.6	1									42.6	1											42.6	1
		SVTFVTKVEKAEDDSNK	57.8	1	26.1	1							57.8	2			49.5	1			33.5	1			49.5	2	48.7	1	57.4	1	44.4	1	26.4	1	57.4	4	57.8	8
		VTIVQSSTVYNDTPATIDK									88.2	2	88.2	2	56.4	1									56.4	1											88.2	3
		VTIVQSSTVYNDTPATIDKAEK							29.6	2	43.6	1	43.6	3	38.2	1									38.2	1											43.6	4
		YHASAIHVPGPEVAR					39.2	2					39.2	2	59	2					37.3	1	29.3	1	59	4			27.4	1	24.2	1			27.4	2	59	8
AT3G45140.1	LOX2, ATLOX2 lipoxygenase 2 chr3:16525437-16529233 FORWARD LENGTH=896	AIQNLFEEGIQLPK													88.2	1									88.2	1											88.2	1
		ALGEAQDDILQFDAPVLINR													90.2	2							81.1	1	90.2	3											90.2	3
		ANIEQEGNTVKEPIQNIK													60.6	2							26.8	1	60.6	3											60.6	3
		DAGLLPLLPR					51.9	1					51.9	1					37.3	1			65.4	1	65.4	2					53.4	1	34.3	1	53.4	2	65.4	5
		ELNNTTLYASR													61.8	2									61.8	2											61.8	2
		GLAEEDKTAEHGVR	37.4	1									37.4	1	58.8	3			35.4	1					58.8	4					51.7	1			51.7	1	58.8	6
		GLDDIADIRGR													40.8	1									40.8	1											40.8	1
		LQYLEGVIDER													59.4	1									59.4	1											59.4	1
		NREEVGEFTKFER													24.6	1							44.8	1	44.8	2					39.1	1			39.1	1	44.8	3
		SLLVELISAK	29	1									29	1					28.2	1			44.2	1	44.2	2											44.2	3
		TDQRITVEDYAQR													27.2	1									27.2	1											27.2	1
		TGRKPcETDPSSEQR																					34.8	1	34.8	1					27.5	1			27.5	1	34.8	2
		YGGEFYVPRDEEFSTAK													41.7	1									41.7	1							28.7	1	28.7	1	41.7	2
		YRKEELETLQGK	28.1	1									28.1	1	59.3	2									59.3	2					22.9	1			22.9	1	59.3	4
		YTmEINAR					24	1					24	1																							24	1
AT3G46780.1	PTAC16 plastid transcriptionally active 16 chr3:17228766-17231021 FORWARD LENGTH=510	AGVPDLGAAQDLAR	37.2	1					41.1	2			41.1	3	52.9	1					58.7	2			58.7	3					37.5	1	51.6	2	51.6	3	58.7	9
		IAQTLLQR																															35	1	35	1	35	1
		LNAVQSPFQDAESIAK																															53.5	1	53.5	1	53.5	1
		VAQTDVAYTLIK																			47.5	1			47.5	1											47.5	1
AT3G47470.1	LHCA4, CAB4 light-harvesting chlorophyll-protein complex I subunit A4 chr3:17493622-17494773 REVERSE LENGTH=251	GEVGYPGGIFNPLNFAPTQEAK	59.2	2									59.2	2	70.4	2	46.1	1							70.4	3			48.7	1					48.7	1	70.4	6
		GEVGYPGGIFNPLNFAPTQEAKEK															27.5	1							27.5	1											27.5	1
		NPGSVNQDPIFK									63.6	1	63.6	1																							63.6	1
		WAmLGVAGmLLPEVFTK	31.3	1									31.3	1	62	2									62	2					33.5	1			33.5	1	62	4
		WQDIKNPGSVNQDPIFK													38.1	1									38.1	1											38.1	1
AT3G47800.1	Galactose mutarotase-like superfamily protein chr3:17634971-17636998 FORWARD LENGTH=358	GFSDVIWSVQK													55.9	1									55.9	1											55.9	1
		KTAVVTEQVTGR													40.4	1									40.4	1											40.4	1
		TAVVTEQVTGR							62.3	1	51.7	1	62.3	2	43.4	1									43.4	1							81.1	1	81.1	1	81.1	4
AT3G49120.1	ATPERX34, PERX34, PRXCB, ATPCB, PRX34 peroxidase CB chr3:18207819-18210041 FORWARD LENGTH=353	ETIVNELR													26.8	1									26.8	1											26.8	1
		MGNITPTTGTQGQIR													55.9	2									55.9	2											55.9	2
		SALVDFDLR													48.8	1									48.8	1											48.8	1
		TEKDAFGNANSAR													23.6	1									23.6	1											23.6	1
AT3G51600.1	LTP5 lipid transfer protein 5 chr3:19138661-19139124 REVERSE LENGTH=118	AARLPGAcR							35.7	2			35.7	2																							35.7	2
		ISYPISAR							55	2			55	2							51	1			51	1							55.2	1	55.2	1	55.2	4
		LNSLAR							38.3	1			38.3	1																							38.3	1
		VRISYPISAR							40.6	2			40.6	2							21.8	1			21.8	1							27.5	1	27.5	1	40.6	4
AT3G52880.1,AT3G52880.2	ATMDAR1, MDAR1 monodehydroascorbate reductase 1 chr3:19601477-19604366 REVERSE LENGTH=434	ARPSAESLDELVK													44.1	1									44.1	1											44.1	1
		EFANQGVQPGELAVISK													29.6	1									29.6	1											29.6	1
		RVEHVDHSR													44.6	1									44.6	1	30.8	1							30.8	1	44.6	2
		VVGAFmEGGSGDENK													51	1									51	1											51	1
AT3G52930.1	Aldolase superfamily protein chr3:19627383-19628874 REVERSE LENGTH=358	ALQQSTLKTWAGKEENVK					19.1	1					19.1	1																							19.1	1
		FADELIANAAYIGTPGK													48.6	1	66.1	1							66.1	2											66.1	2
		GILAADESTGTIGKR					78.7	1					78.7	1	58.8	1			30.8	1			53.8	1	58.8	3											78.7	4
		LASINVENVETNRR	25.7	1									25.7	1																							25.7	1
		LGDGAAESLHVK	48.6	1			91.6	1					91.6	2					29.6	1			78.5	1	78.5	2					70	1			70	1	91.6	5
		SSDGKLFVDILK					32.6	1					32.6	1																							32.6	1
		TVPAAVPAIVFLSGGQSEEEATR					77.5	1					77.5	1			118	1					37.2	1	118	2					31.7	1			31.7	1	118	4
		VLAAcYK			24.2	1							24.2	1													26.7	1							26.7	1	26.7	2
		VSPEVIAEHTVR													39	1									39	1											39	1
		YYEAGAR	30.8	1	25.9	1							30.8	2																							30.8	2
AT3G52960.1	Thioredoxin superfamily protein chr3:19639699-19640403 FORWARD LENGTH=234	RYAILADDGVVK	26.8	1									26.8	1																							26.8	1
		YAILADDGVVK	72.3	1									72.3	1					35.8	1					35.8	1	48.3	1	36.8	1					48.3	2	72.3	4
AT3G53420.1,AT3G53420.2	PIP2A, PIP2, PIP2;1 plasma membrane intrinsic protein 2A chr3:19803906-19805454 REVERSE LENGTH=287	AKDVEAVPGEGFQTR									56.6	1	56.6	1	55.8	1					24.5	1			55.8	2	30.1	1					23	1	30.1	2	56.6	5
		SFGAAVIYNK									41.2	1	41.2	1	23.2	1									23.2	1											41.2	2
AT3G53460.1,AT3G53460.2,AT3G53460.3,AT3G53460.4	CP29 chloroplast RNA-binding protein 29 chr3:19819738-19821423 REVERSE LENGTH=342	AINSLNGADLDGR																			86	2			86	2							75.4	2	75.4	2	86	4
		GGGYGSER																			41.4	1			41.4	1							29.8	1	29.8	1	41.4	2
		SGGYGSER																			48.9	1			48.9	1							24.3	1	24.3	1	48.9	2
		SSYGSGSGSGSGSGSGNR																			42	1			42	1											42	1
		VIYDRDSGR	32.8	1									32.8	1																			42.3	2	42.3	2	42.3	3
		VNAGPPPPK													28.4	1									28.4	1											28.4	1
		VNAGPPPPKREESFSR																															25.8	1	25.8	1	25.8	1
		VSEAEARPPR																									26	2					27.9	2	27.9	4	27.9	4
		VSEAEARPPRGQF																			32.5	2			32.5	2							34.7	2	34.7	2	34.7	4
AT3G54050.1,AT3G54050.2	HCEF1 high cyclic electron flow 1 chr3:20016951-20018527 FORWARD LENGTH=417	VLDIQPTEIHQR	26.2	1									26.2	1													23.9	1							23.9	1	26.2	2
		YIDDLKDPGPTGKPYSAR	34.3	1									34.3	1																							34.3	1
		YIGSLVGDFHR					46.1	1					46.1	1	44.3	1	35.8	1					36.7	1	44.3	3	40	1							40	1	46.1	5
AT3G54890.1	LHCA1 photosystem I light harvesting complex gene 1 chr3:20339706-20340922 REVERSE LENGTH=241	KYPGGAFDPLGYSK													36.6	1									36.6	1											36.6	1
		SMEKDPEKK													28.3	2									28.3	2											28.3	2
		VKEIKNGR													26.1	1									26.1	1											26.1	1
		YPGGAFDPLGYSK													48.5	1									48.5	1											48.5	1
AT3G55440.1	ATCTIMC, TPI, CYTOTPI triosephosphate isomerase chr3:20553794-20556078 FORWARD LENGTH=254	EAGSTmDVVAAQTK													62.9	1									62.9	1											62.9	1
		NVSADVAATTR	87.4	1	43.4	1							87.4	2	64.7	2			53.7	1					64.7	3	90.1	1	64.2	1	62.4	1			90.1	3	90.1	8
		VASPAQAQEVHDELRK													19.9	1									19.9	1											19.9	1
AT3G55800.1	SBPASE sedoheptulose-bisphosphatase chr3:20709640-20711421 FORWARD LENGTH=393	ATFDNSEYSK					35.5	1					35.5	1			25.1	1					34.1	1	34.1	2											35.5	3
		GIFTNVTSPTAK	55.5	1							40.8	1	55.5	2	53.9	1							44.2	1	53.9	2			41.1	1					41.1	1	55.5	5
		LIDYYVKEK					33.1	1					33.1	1	34	1							31	1	34	2											34	3
		LKNVPIGVTA	43.9	2	51.5	1	32.7	1					51.5	4	29.5	1	51.5	2	42.6	1	39	1			51.5	5	38.2	2	48.7	1	32.5	1			48.7	4	51.5	13
		mFSPGNLR			21.6	1							21.6	1			24.2	1	25.5	1					25.5	2	26.3	1							26.3	1	26.3	4
		YTGGmVPDVNQIIVK					48.9	1					48.9	1			34.9	1							34.9	1	28	1							28	1	48.9	3
		YTGGmVPDVNQIIVKEK	28.1	1			20.7	1					28.1	2									26.7	1	26.7	1											28.1	3
AT3G56940.1	CRD1, CHL27, ACSF dicarboxylate diiron protein, putative (Crd1) chr3:21076594-21078269 FORWARD LENGTH=409	EIQESLLTPR													27.4	1									27.4	1											27.4	1
		LLAIGETDDASFIK													36.8	1									36.8	1											36.8	1
AT3G58510.1,AT3G58510.2,AT3G58510.3	DEA(D/H)-box RNA helicase family protein chr3:21640608-21643464 FORWARD LENGTH=612	AVYPFAVILSPTR																			40.3	1			40.3	1							48	1	48	1	48	2
		NRPSEPVAAPLPQNDHAGYGGQPAGSR																			26.8	1			26.8	1											26.8	1
		TPILVATDVAAR							91.5	2			91.5	2							90.2	1			90.2	1							100	1	100	1	100	4
AT3G60750.1,AT3G60750.2	Transketolase chr3:22454004-22456824 FORWARD LENGTH=741	AFGDFQK	26.3	1	21.9	1							26.3	2					25.1	1					25.1	1											26.3	3
		ALPTYTPESPGDATR	63.2	4			58.1	1					63.2	5	61.6	2	36	1			49.9	1			61.6	4	61.3	3	40.3	1	91.5	1	40.9	2	91.5	7	91.5	16
		AmPNTLmFRPADGNETAGAYK																									36.5	1			31	1			36.5	2	36.5	2
		FLAIDAVEK	29.1	1									29.1	1			21.9	1	29.9	1					29.9	2	32.8	1	29.4	1					32.8	2	32.8	5
		FLAIDAVEKAK	53.9	1	40.6	1	72.1	1					72.1	3			43	1	76.1	1			66.3	2	76.1	4			29.6	1	67.7	2			67.7	3	76.1	10
		HTPEGATLESDWSAK					42.6	1					42.6	1													35.7	1			46	1			46	2	46	3
		KTPSILALSR	63.4	2	40.7	1	47	1					63.4	4			40.5	2	47.5	1			57.2	1	57.2	4			37.4	1	60.4	1			60.4	2	63.4	10
		KYPEEASELK	32.7	2									32.7	2																							32.7	2
		NGNTGYDEIR	43.8	2									43.8	2			62.9	2							62.9	2	51.4	2							51.4	2	62.9	6
		SIITGELPAGWEK															43.9	1					64.2	1	64.2	2											64.2	2
		TPSILALSR													25.5	1							45.4	1	45.4	2	61	1							61	1	61	3
		TVTDKPTLIK																					32.7	1	32.7	1					24.6	1			24.6	1	32.7	2
		VTTTIGYGSPNK													44.4	1									44.4	1											44.4	1
		VVPGFLGGSADLASSNmTLLK					87.8	1					87.8	1			66.8	1					89.8	1	89.8	2											89.8	3
AT3G62030.1,AT3G62030.2,AT3G62030.3	ROC4 rotamase CYP 4 chr3:22973708-22975139 FORWARD LENGTH=260	FEDENFTLK	45.2	1									45.2	1	31.8	1									31.8	1	29.9	1							29.9	1	45.2	3
		IVmGLFGEVVPK	93.4	2			48.8	2					93.4	4	90.2	1	89.7	2	50.3	1			55.2	2	90.2	6	93.8	2	102	1	69.3	3			102	6	102	16
		TLESQETR	32.9	1	38.7	1	36	1					38.7	3	57.4	2									57.4	2			56.7	1					56.7	1	57.4	6
		YGYKGSSFHR	41.7	1									41.7	1													38.7	1	34.4	1					38.7	2	41.7	3
AT3G63160.1	FUNCTIONS IN: molecular function unknown; INVOLVED IN: biological process unknown; LOCATED IN: chloroplast outer membrane, thylakoid, chloroplast thylakoid membrane, chloroplast, chloroplast envelope; EXPRESSED IN: 21 plant structures; EXPRESSED DURING: 13 growth stages; BEST Arabidopsis thaliana protein match is: outer envelope membrane protein 7 (TAIR:AT3G52420.1); Has 26 Blast hits to 26 prote…	DKSDSDDATVPPPSGA	43.1	1									43.1	1																							43.1	1
		SGGEVNFPK	52.6	1	22.6	1							52.6	2					55.2	1					55.2	1											55.2	3
AT4G01610.1,AT4G01610.2	Cysteine proteinases superfamily protein chr4:694857-696937 FORWARD LENGTH=359	GWGDDGYFmIR													51.3	1									51.3	1											51.3	1
		SNPQDImAEVYK													46.7	1									46.7	1											46.7	1
AT4G02520.1	ATGSTF2, ATPM24.1, ATPM24, GST2, GSTF2 glutathione S-transferase PHI 2 chr4:1110673-1111531 REVERSE LENGTH=212	LAFEQIFK																					27.7	1	27.7	1	22.8	1	29.5	1	50.5	1	26	1	50.5	4	50.5	5
		LFTERPR	30.5	2									30.5	2																							30.5	2
		NPFGQVPAFEDGDLKLFESR	57.9	1									57.9	1													32.7	1							32.7	1	57.9	2
		VFGHPASIATR													29.2	1									29.2	1											29.2	1
		VLDVYEAR	47	1									47	1																	28.3	1			28.3	1	47	2
		VLIALHEK	33.8	1									33.8	1																							33.8	1
		VNEWVAEITK	69.3	1									69.3	1															60.8	1	68	1			68	2	69.3	3
AT4G02770.1	PSAD-1 photosystem I subunit D-1 chr4:1229247-1229873 REVERSE LENGTH=208	AEKTDSSAAAAAAPATK	60	1									60	1																							60	1
		DGVYPEK	31.9	1									31.9	1			22.4	1							22.4	1	24.2	1							24.2	1	31.9	3
		DGVYPEKANPGR	54	2									54	2	45.3	1	40.4	1	26.9	1					45.3	3	35.3	1							35.3	1	54	6
		EGPNLLK	30	1									30	1																							30	1
		EGVGLNmR													24.6	1	28.3	1							28.3	2	42.3	1	27.6	1					42.3	2	42.3	4
		EQIFEmPTGGAAImR	35.2	1									35.2	1	69.9	3	60.1	1							69.9	4	82.7	2							82.7	2	82.7	7
		FTGKQSYDL																	22.2	1					22.2	1											22.2	1
		KEQcLALGTR	44.5	1									44.5	1																							44.5	1
		NVSPIEVK																									26	1							26	1	26	1
		SIGKNVSPIEVK	53.7	1									53.7	1																							53.7	1
AT4G02930.1	GTP binding Elongation factor Tu family protein chr4:1295751-1298354 REVERSE LENGTH=454	GLKREDIQR																					22.2	1	22.2	1											22.2	1
		GSALSALQGTNDEIGR																					55.8	1	55.8	1											55.8	1
AT4G04640.1	ATPC1 ATPase, F1 complex, gamma subunit protein chr4:2350761-2351882 REVERSE LENGTH=373	ALQESLASELAAR							77.7	2	77.5	1	77.7	3	78.2	1			50.2	1	85.3	1	37.1	1	85.3	4	63.4	3					78.1	1	78.1	4	85.3	11
		DRIDSVKNTQK															26	1							26	1											26	1
		EAQAVADDVFSLFISEEVDKVELLYTK							65.2	1			65.2	1																							65.2	1
		GLGLEYTVISVGK					67.6	1	56.2	1			67.6	2	57.5	1	21.8	1					71.2	1	71.2	3					71.7	1			71.7	1	71.7	6
		ITEAmKLVAAAK																													38.2	1			38.2	1	38.2	1
		KGNSYFLR									24.5	1	24.5	1			52.5	1					41.8	1	52.5	2											52.5	3
		mSAmSSASDNASDLKK	50.6	3			47.5	1			33.6	2	50.6	6	64.8	4	50.3	5	27	1			66.8	2	66.8	12	41.3	3	49.8	1	59.5	1	39.4	1	59.5	6	66.8	24
		RPYIPVDKYLEAGTLPTAK																					52.3	1	52.3	1											52.3	1
		SEPVIHTLLPLSPK													44.5	1									44.5	1											44.5	1
		SLSmVYNR																									32	1			35.3	1	29.6	1	35.3	3	35.3	3
		VALVVVTGDR													32.2	1							37.4	1	37.4	2											37.4	2
		YLEAGTLPTAK	26	1									26	1																							26	1
AT4G05180.1	PSBQ, PSBQ-2, PSII-Q photosystem II subunit Q-2 chr4:2672093-2673170 REVERSE LENGTH=230	AKDSAKEIINVK	76.2	1									76.2	1																							76.2	1
		ASYLR	26.6	1									26.6	1					26.5	1					26.5	1											26.6	2
		AWPYVQNDLR	52.1	1									52.1	1			25.2	1							25.2	1	32.6	1	23.5	1			28.1	1	32.6	3	52.1	5
		DFSLALKDR	27.3	1									27.3	1																							27.3	1
		FYIQPLSPTEAAAR																			60.4	1			60.4	1	41.1	1	55.1	2			43.8	1	55.1	4	60.4	5
		KAWPYVQNDLR	21.7	1									21.7	1																			46	1	46	1	46	2
		LFQTIDNLDYAAR	60.3	1									60.3	1			37.8	1							37.8	1											60.3	2
		VGGPPLPSGGLPGTDNSDQAR	85.9	1									85.9	1			56.6	1	44.2	1					56.6	2			59.6	1					59.6	1	85.9	4
AT4G08870.1	Arginase/deacetylase superfamily protein chr4:5646654-5648693 REVERSE LENGTH=344	DTADDmTAmVAAK													102	1									102	1											102	1
		FGVEQYEmR													65.2	1									65.2	1											65.2	1
		LLQVGIR													28.1	1									28.1	1											28.1	1
		SLPTSLVETGQNR													82.2	1									82.2	1											82.2	1
		VIDASLTLIR													42.3	1									42.3	1											42.3	1
		VLSDVGDIPVQEIR													24.5	1									24.5	1											24.5	1
AT4G09320.1	NDPK1 Nucleoside diphosphate kinase family protein chr4:5923424-5924366 FORWARD LENGTH=169	GDFAIDIGR	56	1									56	1																							56	1
		IIGATNPAASEPGTIR	58.9	1									58.9	1	61	1									61	1											61	2
AT4G10340.1	LHCB5 light harvesting complex of photosystem II 5 chr4:6408200-6409496 FORWARD LENGTH=280	AVSETSDELAK													90.9	1			31.8	1					90.9	2			58.1	1	63.6	1			63.6	2	90.9	4
		AVSETSDELAKWYGPDRR	38	1			35	1	27.8	1			38	3									34.7	1	34.7	1					34.5	1			34.5	1	38	5
		DPEQGALLK													49.3	1									49.3	1											49.3	1
		IFLPDGLLDR	50.4	1									50.4	1	37.8	2	39.2	1			38.7	1	44.5	1	44.5	5	32.7	1			27.5	1	37.3	1	37.3	3	50.4	9
		IFLPDGLLDRSEIPEYLNGEVAGDYGYDPFGLGK	50.9	1							44	1	50.9	2																							50.9	2
		IFLPDGLLDRSEIPEYLNGEVAGDYGYDPFGLGKKPENFAK									33.4	1	33.4	1																							33.4	1
		KKPAPAKSK																					20.6	2	20.6	2					41.7	1			41.7	1	41.7	3
		SKAVSETSDELAK	51.6	1							43.5	1	51.6	2	87.2	1	66.1	1					57.8	1	87.2	3	49.1	1	32.9	1	57.9	2			57.9	4	87.2	9
		TGALLLDGNTLNYFGK	80.8	1									80.8	1	95.2	2							72.8	2	95.2	4	60.6	2	34.4	1	80.4	1			80.4	4	95.2	9
		VKEIKNGR													26.1	1									26.1	1											26.1	1
		WAmLGAAGFIIPEALNK													77.7	3									77.7	3											77.7	3
		WYGPDRR	23.1	1									23.1	1																							23.1	1
		YGANcGPEAVWFK													83	1							40.4	1	83	2											83	2
		YQAFELIHAR									56.7	1	56.7	1	71.7	1									71.7	1	51.2	2	47.7	2	24.7	1			51.2	5	71.7	7
AT4G11150.1	TUF, emb2448, TUFF, VHA-E1 vacuolar ATP synthase subunit E1 chr4:6800091-6801696 FORWARD LENGTH=230	IFLPPPPK															26.1	1							26.1	1											26.1	1
		KIDYSmQLNASR													38.9	1									38.9	1											38.9	1
		VHAPEVAVDTK													50.2	1									50.2	1											50.2	1
AT4G13930.1	SHM4 serine hydroxymethyltransferase 4 chr4:8048013-8050021 REVERSE LENGTH=471	AGmIFYR																	41.6	1					41.6	1	32	1							32	1	41.6	2
		ANAVALGNYLmSK			43.8	1							43.8	1			55.9	1							55.9	1					47.8	2			47.8	2	55.9	4
		NAVFGDSSALAPGGVR																	31.1	1					31.1	1											31.1	1
AT4G13940.1,AT4G13940.3	HOG1, EMB1395, SAHH1, MEE58, ATSAHH1 S-adenosyl-L-homocysteine hydrolase chr4:8054931-8056676 FORWARD LENGTH=485	AGIIVLAEGR	29	1									29	1					32.9	1					32.9	1	30.8	2							30.8	2	32.9	4
		ATDVmIAGK	71.5	4			47.4	1					71.5	5	39.1	1							45.3	1	45.3	2	42.1	1							42.1	1	71.5	8
		HSLPDGLMR	36.9	1									36.9	1	24.8	1									24.8	1											36.9	2
		KVYVLPK			33.4	1	33.2	1					33.4	2																	26.1	1			26.1	1	33.4	3
		LVGVSEETTTGVK	78.1	1			57.6	1					78.1	2	46.5	1							37.3	1	46.5	2					47.8	1			47.8	1	78.1	5
		LVGVSEETTTGVKR	33.8	1	28.2	1	51.5	2					51.5	4									84.2	3	84.2	3	23.9	1			93.6	1			93.6	2	93.6	9
		SKFDNLYGcR					53.1	1					53.1	1									26.6	1	26.6	1					38.8	1			38.8	1	53.1	3
		TEFGPSQPFKGAR			59.7	1							59.7	1																							59.7	1
		VALLHLGK	28.3	1									28.3	1																							28.3	1
		VAVIcGYGDVGKGcAAAmK					29.1	1					29.1	1																							29.1	1
AT4G14880.1,AT4G14880.2,AT4G14880.3,AT4G14880.4	OASA1, OLD3, CYTACS1 O-acetylserine (thiol) lyase (OAS-TL) isoform A1 chr4:8518209-8520050 REVERSE LENGTH=322	GAIAKAEEILAK					35.5	1					35.5	1																							35.5	1
		IGFSmISDAEKK	21.6	1									21.6	1																							21.6	1
		LFVAIFPSFGER	29.8	1									29.8	1	28.1	1	35	1							35	2											35	3
		TPNGYmLQQFENPANPK															52	1							52	1											52	1
		YLKEQNANVK															25	1							25	1											25	1
AT4G19170.1	NCED4, CCD4 nine-cis-epoxycarotenoid dioxygenase 4 chr4:10481835-10483622 FORWARD LENGTH=595	SPITNPSDNNDRR					33.3	1					33.3	1																							33.3	1
		TDPITGETFAFR					33.8	1					33.8	1																							33.8	1
AT4G19640.1	ARA7, ARA-7, ATRABF2B, ATRAB5B, RABF2B, ATRAB-F2B, RAB-F2B Ras-related small GTP-binding family protein chr4:10687441-10689449 REVERSE LENGTH=200	FVKDQFVEFQESTIGAAFFSQTLAVNDATVK									43.1	2	43.1	2	52.5	3									52.5	3											52.5	5
		FVKDQFVEFQESTIGAAFFSQTLAVNDATVKFEIWDTAGQER													31.1	1									31.1	1											31.1	1
		GAAAAIIVFDVTNQASFER									103	14	103	14	101	10									101	10											103	24
AT4G20260.1,AT4G20260.2,AT4G20260.3,AT4G20260.4,AT4G20260.5	ATPCAP1, PCAP1 plasma-membrane associated cation-binding protein 1 chr4:10941593-10943227 FORWARD LENGTH=225	TFDESKETINK													49.4	1									49.4	1											49.4	1
		TFDESKETINKEIEEK													43.8	1									43.8	1											43.8	1
		VSVFLPEEVK													51.2	1									51.2	1											51.2	1
		VVETYEATSAEVK													119	4									119	4											119	4
AT4G20360.1	ATRAB8D, ATRABE1B, RABE1b RAB GTPase homolog E1B chr4:10990036-10991466 FORWARD LENGTH=476	EGGKTVGAGVIGTILE					21.4	1					21.4	1	59.9	1	36.3	1			33.3	2	21.2	1	59.9	5	29.9	2			52.8	3			52.8	5	59.9	11
		EHILLAK																					25.6	1	25.6	1											25.6	1
		FAIREGGK	41	1									41	1			40.9	1							40.9	1			37.1	1			32.3	1	37.1	2	41	4
		GIQKADIQR	56.4	1			41.4	2			38.2	2	56.4	5	51	2	49.3	2			39.4	1	39.4	1	51	6					37.9	3	48.5	1	48.5	4	56.4	15
		GITINTATVEYETENR																					70.8	1	70.8	1											70.8	1
		GTVATGRVER	30.1	1	24.9	1					26.3	1	30.1	3			37.3	1	28.3	1			27.8	1	37.3	3	22.7	1	25.5	1	38.1	1			38.1	3	38.1	9
		ILDEALAGDNVGLLLR	60.6	3									60.6	3			97.3	1	24.6	1			100	1	100	3	43.1	2			53.4	1			53.4	3	100	9
		IMNDKDEESK													61.5	1									61.5	1											61.5	1
		ImNDKDEESKmVmPGDR																													18.5	1			18.5	1	18.5	1
		IVVELIVPVAcEQGmR					33.7	1					33.7	1									52.2	1	52.2	1					26.6	1			26.6	1	52.2	3
		KYDEIDAAPEER	85.4	6	46.8	2	78.3	3	47.8	1	70.7	2	85.4	14	84.4	4	89.6	6	75.7	5	74.6	3	72.1	2	89.6	20	78.8	4	83.7	4	68.2	3	86.8	2	86.8	13	89.6	47
		KYDEIDAAPEERAR	40.2	1	41	2	28.1	2					41	5	61.7	2	33.4	2	24	2	57.2	1			61.7	7	31.9	1	33.6	2	30	1	38.7	1	38.7	5	61.7	17
		SYTVTGVEmFQK	54.5	3			36.3	2			72	3	72	8	77.6	3	29.6	2	31.9	1	56.9	2			77.6	8	41.6	3	39.6	2			66.3	2	66.3	7	77.6	23
		TTDVTGKVTK	33.6	2	26.5	1							33.6	3			43.9	2							43.9	2					50.2	2			50.2	2	50.2	7
		TVGAGVIGTILE																	29.8	1	27.7	1			29.8	2	31.9	1			23.4	1	31.2	1	31.9	3	31.9	5
		VGETVDLVGLR					72.7	1	49.2	1	80.4	1	80.4	3	90.8	1					94.3	1	85.6	1	94.3	3	38.9	1	79.6	1	85.4	1	87.7	1	87.7	4	94.3	10
		VGETVDLVGLRETR					57.7	1	34.7	1	38.6	2	57.7	4	49.4	3			50.7	1	54.2	1	53.4	1	54.2	6	43.7	1	59.3	2	51.4	2	56.2	2	59.3	7	59.3	17
AT4G21280.1	PSBQ, PSBQA, PSBQ-1 photosystem II subunit QA chr4:11334446-11335587 FORWARD LENGTH=223	AKESAKDIINVKPLIDR	28.5	2									28.5	2																							28.5	2
		ASYLR	26.6	1									26.6	1					26.5	1					26.5	1											26.6	2
		AWPYVQNDLR	52.1	1									52.1	1			25.2	1							25.2	1	32.6	1	23.5	1			28.1	1	32.6	3	52.1	5
		DFALALKDR	41.6	1									41.6	1													26.3	1							26.3	1	41.6	2
		DIINVKPLIDR															31.1	1							31.1	1											31.1	1
		ESAKDIINVKPLIDR	28	1									28	1																							28	1
		FYLQPLPPTEAAAR																			41.8	1			41.8	1							28.6	1	28.6	1	41.8	2
		KAWPYVQNDLR	21.7	1									21.7	1																			46	1	46	1	46	2
		LFDTIDNLDYAAK	52.4	1									52.4	1	25.4	1									25.4	1	37.2	1	27.1	1					37.2	2	52.4	4
		VGPPPAPSGGLPGTDNSDQAR	81.9	1	31.1	1							81.9	2	69	1			60.3	2	74.4	1			74.4	4							71.2	2	71.2	2	81.9	8
		YYAETVSALNEVLAK	40.6	1									40.6	1																							40.6	1
AT4G21650.1	Subtilase family protein chr4:11501314-11504656 REVERSE LENGTH=766	AVNDQGLGPIPK													42.8	1									42.8	1											42.8	1
		LADPFDYGGGLVNPEK													73.2	1									73.2	1											73.2	1
		TSPSGEPIFAEGSNKK													28.2	1									28.2	1											28.2	1
		TVLVFDSATPIAGK													61.5	1									61.5	1											61.5	1
AT4G22010.1	sks4 SKU5 similar 4 chr4:11663429-11666463 FORWARD LENGTH=541	ITYGDIYPLGVK																															49.4	3	49.4	3	49.4	3
		KGVSGPVPNGPTLDIASSLYQAR																															21.4	1	21.4	1	21.4	1
		NLPNPDGVLINGR							34.6	1			34.6	1																							34.6	1
		TIILANSAPWINGK							53.2	1			53.2	1							51.7	1			51.7	1											53.2	2
		YAVNGASFVAPDTPLK																															40.5	1	40.5	1	40.5	1
AT4G22240.1	Plastid-lipid associated protein PAP / fibrillin family protein chr4:11766090-11767227 REVERSE LENGTH=310	FAGPLGTNSISTNAK													96.7	1									96.7	1											96.7	1
		GDGGSVFVLIK													50.9	1									50.9	1											50.9	1
		GLLTSVQDTASSVAR													24.7	1									24.7	1											24.7	1
		IDLNPIR													38.9	1									38.9	1											38.9	1
		SLVDSLYGTDR													63.4	1									63.4	1											63.4	1
AT4G23560.1	AtGH9B15, GH9B15 glycosyl hydrolase 9B15 chr4:12293633-12295788 REVERSE LENGTH=479	GSSLPSIQSKPEK													28.7	1									28.7	1											28.7	1
		SGKLPTNQR													22.6	1									22.6	1											22.6	1
		SILFFEGQR													42.7	1									42.7	1											42.7	1
		SVDSTYSSTLLNHAK													31.8	1									31.8	1											31.8	1
AT4G23600.1	CORI3, JR2 Tyrosine transaminase family protein chr4:12310657-12312885 FORWARD LENGTH=422	ANVLLPSPGFPWDLVR													43.4	1									43.4	1											43.4	1
		AVLYGSGNAYAPSLGLAAAK													126	1									126	1											126	1
		EENLVVLPGIAFSQK													78.1	1									78.1	1											78.1	1
		FSSIVPVVTLGSISK													45.8	1									45.8	1											45.8	1
		HSIDmETPVLEDALER													97.1	2									97.1	2											97.1	2
		HYNFLPEK													34.2	1									34.2	1											34.2	1
		ImVVSDEVFR													53.4	1									53.4	1											53.4	1
		KLTADDVFMTLGcK													114	2									114	2											114	2
		NEILETSNTAEK													78	1									78	1											78	1
		SIYKNLEVR													35.2	1									35.2	1											35.2	1
		TPQEFFDKR													54.3	2									54.3	2											54.3	2
		WTLFGSNPFVPmGK													47	2									47	2											47	2
AT4G24280.1	cpHsc70-1 chloroplast heat shock protein 70-1 chr4:12590094-12593437 FORWARD LENGTH=718	AVITVPAYFNDSQR							65.3	1			65.3	1	37	2					39.9	2	35.5	1	39.9	5											65.3	6
		DAIDTKNQADSVVYQTEK							27.8	1			27.8	1																							27.8	1
		DEGIDLLKDKQALQR							59.6	1			59.6	1																							59.6	1
		FLNDKVTK							33.1	1			33.1	1																							33.1	1
		GGDGDDVIDADFTDSQ							32	1			32	1																							32	1
		HIETTLTR							30.5	1			30.5	1																							30.5	1
		IINEPTAASLAYGFDR							76.9	1			76.9	1	47.7	1							37.1	1	47.7	2											76.9	3
		IPAVQELVR															23.5	1							23.5	1	32.5	1							32.5	1	32.5	2
		KLVDDASR							37.2	1			37.2	1																							37.2	1
		KmNEVDEESKQVSYR							52.8	1			52.8	1			28.8	1							28.8	1	54.6	1							54.6	1	54.6	3
		LTEAAEK							29	1			29	1																							29	1
		LTEAAEKAK							22.9	1			22.9	1																							22.9	1
		LVDDASR							32.8	1			32.8	1																							32.8	1
		LVGQIAKR							37.6	1			37.6	1																							37.6	1
		MNEVDEESKQVSYR							50.2	3			50.2	3																							50.2	3
		NQADSVVYQTEK							29.9	1			29.9	1																							29.9	1
		SGDRLVGQIAK																					22.2	1	22.2	1											22.2	1
		SGDRLVGQIAKR	41.4	3									41.4	3			46.5	1	51.5	1					51.5	2	50.3	2							50.3	2	51.5	7
		TPVENSLR							49.2	1			49.2	1																							49.2	1
		TPVENSLRDAK					29.4	1					29.4	1																							29.4	1
		TTPSVVAYTK							43.4	1			43.4	1																							43.4	1
		VVRDENNNVKLEcPAINK							26.4	2			26.4	2																							26.4	2
AT4G25130.1	PMSR4 peptide met sulfoxide reductase 4 chr4:12898802-12899998 REVERSE LENGTH=258	IAREAVEKQQK					25.2	1					25.2	1																							25.2	1
		IVTEILPATK					52.8	1					52.8	1									46.8	1	46.8	1					26.2	1			26.2	1	52.8	3
		QGGDVGTQYR					35.2	1					35.2	1																							35.2	1
		SGIYYYTDEQER					44.3	1					44.3	1					44.1	1					44.1	1	45.1	1							45.1	1	45.1	3
AT4G25630.1,AT5G52470.1,AT5G52470.2	FIB2, ATFIB2 fibrillarin 2 chr4:13074239-13076205 FORWARD LENGTH=320	GKEDALVTK							45.9	1			45.9	1							36.8	1			36.8	1							39.8	1	39.8	1	45.9	3
		NLVPGEAVYNEK							25.1	1			25.1	1																							25.1	1
		NLVPGEAVYNEKR							29.6	1			29.6	1							22.9	1			22.9	1							32	1	32	1	32	3
AT4G26530.1,AT4G26530.2	Aldolase superfamily protein chr4:13391566-13392937 FORWARD LENGTH=358	FASINVENIESNR					48.1	1					48.1	1			43.7	1							43.7	1											48.1	2
		GILAADESTGTIGKR					78.7	1					78.7	1	58.8	1									58.8	1											78.7	2
		IGATEPSELSIQENAK													83.2	2									83.2	2	52.2	1							52.2	1	83.2	3
		YIATPGKGILAADESTGTIGKR					64.8	1					64.8	1																							64.8	1
AT4G27270.1,AT5G54500.1	Quinone reductase family protein chr4:13661458-13663243 REVERSE LENGTH=205	AFLDATGGLWR	47.7	1									47.7	1	68.7	1									68.7	1											68.7	2
		GGSPYGAGTFAGDGSR													59.5	1									59.5	1											59.5	1
AT4G27440.1,AT4G27440.2	PORB protochlorophyllide oxidoreductase B chr4:13725648-13727107 FORWARD LENGTH=401	GNVVVTGASSGLGLATAK					46.8	1					46.8	1									48.3	2	48.3	2											48.3	3
		GYVSETESGKR	32.4	1			60.5	1					60.5	2			59.9	2	45.4	1			44	1	59.9	4			32.7	1	27.6	1			32.7	2	60.5	8
		KGNVVVTGASSGLGLATAK																					79.5	1	79.5	1											79.5	1
		LAQVVSDPSLTK	85.3	1	50	1	66.4	1					85.3	3	68.5	1	70.8	2	52.6	2	60.8	1	48.7	1	70.8	7	65.4	2	60.3	1	53.3	1	59.6	1	65.4	5	85.3	15
AT4G28750.1	PSAE-1 Photosystem I reaction centre subunit IV / PsaE protein chr4:14202951-14203888 REVERSE LENGTH=143	AAEDPAPASSSSK	72.8	1			25.7	1					72.8	2	38.1	1	56.4	1					33.7	1	56.4	3	63	1			40.8	1			63	2	72.8	7
		AAEDPAPASSSSKDSPAAAAAPDGATATKPKPPPIGPK	30.2	1									30.2	1																							30.2	1
		DSPAAAAAPDGATATKPKPPPIGPK													22.9	1									22.9	1											22.9	1
		NVGSVVAVDQDPK	57.3	1									57.3	1	72.2	1									72.2	1											72.2	2
		NVGSVVAVDQDPKTRYPVVVR	36	1									36	1			30.6	1							30.6	1											36	2
AT4G28780.1	GDSL-like Lipase/Acylhydrolase superfamily protein chr4:14215603-14217159 FORWARD LENGTH=367	ADSPPYGIDYPTGRPTGR																			33.6	1			33.6	1							32	1	32	1	33.6	2
		FGFVTSK																															26.5	1	26.5	1	26.5	1
AT4G30190.1,AT4G30190.2	AHA2, PMA2, HA2 H(+)-ATPase 2 chr4:14770820-14775920 REVERSE LENGTH=948	AAHLVDSTNQVGHFQK																													25.5	1			25.5	1	25.5	1
		ADIGIAVADATDAAR																													51.3	1			51.3	1	51.3	1
		GAPEQILELAK																													39.4	1			39.4	1	39.4	1
		KADIGIAVADATDAAR																													114	1			114	1	114	1
		KHIVGmTGDGVNDAPALKK																													24.3	1			24.3	1	24.3	1
		LGDIIPADAR																													55	2	50.6	2	55	4	55	4
		LSQQGAITKR																													43.5	2			43.5	2	43.5	2
		mITGDQLAIGK																													39.4	1			39.4	1	39.4	1
		mITGDQLAIGKETGR																													38.2	1			38.2	1	38.2	1
		RALNLGVNVK																													31	1			31	1	31	1
		TALTYIDGSGNWHR																													51.6	1			51.6	1	51.6	1
AT4G30920.1	Cytosol aminopeptidase family protein chr4:15046589-15049304 REVERSE LENGTH=583	GLTFDSGGYNIK	23.1	1									23.1	1																							23.1	1
		SGVADmVNTGGR	27	1									27	1																							27	1
		TIEVNNTDAEGR															32.4	1							32.4	1											32.4	1
		VGLIGLGK																													30.1	1			30.1	1	30.1	1
AT4G32260.1	ATPase, F0 complex, subunit B/B', bacterial/chloroplast chr4:15573859-15574586 REVERSE LENGTH=219	AARAEIAAALNK	44.5	1									44.5	1																							44.5	1
		AEIAAALNK	35.4	1	39.8	1							39.8	2																							39.8	2
		ETQVEVEEKLAEGR	29.2	1									29.2	1																							29.2	1
		LASVKDTSTEVKELDEQAAAVmR	51.1	2									51.1	2			31.9	1							31.9	1											51.1	3
AT4G33010.1	AtGLDP1, GLDP1 glycine decarboxylase P-protein 1 chr4:15926852-15931150 REVERSE LENGTH=1037	EYAAFPAPWLR					41.8	1					41.8	1			32.8	1	44.8	1	42.4	1	57.1	1	57.1	4			42.3	1	48.8	1	34.7	1	48.8	3	57.1	8
		GNINIEEVRK					40.8	1					40.8	1									43	1	43	1					31	1			31	1	43	3
		IAILNANYmAK	40	1			70.8	1					70.8	2									73.8	1	73.8	1											73.8	3
		IIGISVDSSGK																									35.2	1							35.2	1	35.2	1
		RHNSATPDEQTHMAK															24.2	1							24.2	1	41	1			17.4	1			41	2	41	3
		TRADGFDLK	28.8	1									28.8	1																							28.8	1
AT4G33470.1	hda14, ATHDA14 histone deacetylase 14 chr4:16102774-16105439 REVERSE LENGTH=423	GSQILELANFK					44	1	57.6	1	63.6	2	63.6	4	83.8	1			33	1	50.1	1	69.7	1	83.8	4			51.4	1	32.4	1	52	1	52	3	83.8	11
		LAKEVcGGR									44.8	1	44.8	1	54.4	1									54.4	1											54.4	2
		TATVEDIANVHDK									63.6	1	63.6	1	62.4	1									62.4	1											63.6	2
		THGLKR													25.2	1									25.2	1											25.2	1
		TVFEEIIVPcAQR									31.1	1	31.1	1	62.8	1					27.9	1			62.8	2											62.8	3
		VPAIVNALEmNELTPK													57.9	1									57.9	1											57.9	1
		VRDAIQR			31.3	1					34.1	1	34.1	2					33.8	1					33.8	1											34.1	3
AT4G33510.1	DHS2 3-deoxy-d-arabino-heptulosonate 7-phosphate synthase chr4:16116496-16118549 FORWARD LENGTH=507	AFATGGYAAmQR															57.3	1							57.3	1											57.3	1
		LNASQSLELAFIIAER									24	1	24	1																							24	1
		mAGQFAKPR	27.9	1									27.9	1			50	1							50	1	49.7	1							49.7	1	50	3
AT4G34870.1	ROC5, ATCYP1 rotamase cyclophilin 5 chr4:16614451-16614969 FORWARD LENGTH=172	AIEKVGSDSGK	20.2	1									20.2	1																							20.2	1
		FKDENFIKK	29	1									29	1																							29	1
		NGTGGESIYGAK	50.8	1									50.8	1													21.5	1							21.5	1	50.8	2
		VFFDmSLSGTPIGRIEmELFADTTPNTAENFR	30.4	1									30.4	1																							30.4	1
AT4G34980.1	SLP2 subtilisin-like serine protease 2 chr4:16656929-16659223 REVERSE LENGTH=764	SPQFLGLQNQK							39.6	1			39.6	1	32	1									32	1							28.5	1	28.5	1	39.6	3
		TATNVGQAEAVYR													66.6	1									66.6	1											66.6	1
AT4G35090.1	CAT2 catalase 2 chr4:16700937-16703215 REVERSE LENGTH=492	APGVQTPVIVR	62.5	2	59.7	1	36.7	1					62.5	4	38.3	2	51.6	2	54.2	3	36.9	1	59.6	1	59.6	9	57.8	2	57	1	57.1	3			57.8	6	62.5	19
		DGmKFPDmVHALKPNPK																					22.9	1	22.9	1											22.9	1
		EGNFDLVGNNFPVFFIR																					35.7	1	35.7	1											35.7	1
		ERIPER																									30.1	2							30.1	2	30.1	2
		ERIPERVVHAR					19.2	1					19.2	1																							19.2	1
		FSTVIHER	46.9	2	31.5	2	63.2	1					63.2	5			39.5	1	21.4	1			34.7	1	39.5	3			28.7	1	27.9	1			28.7	2	63.2	10
		GPILLEDYHLVEK			62	2	70.8	3					70.8	5			31.9	3	39.7	2			72.6	2	72.6	7			53.2	2	49.9	3	17.1	1	53.2	6	72.6	18
		GSPETLRDPR	25.9	1									25.9	1			25.8	1							25.8	1											25.9	2
		HAEKYPTPPAVcSGKR																					38.4	1	38.4	1											38.4	1
		HRLGPNYLQLPVNAPK					38.5	1					38.5	1			24.8	1					29.4	1	29.4	2					19.4	1			19.4	1	38.5	4
		ITHEIR	26.1	1									26.1	1																	39.5	1			39.5	1	39.5	2
		LGPNYLQLPVNAPK	86.4	2	93.1	1	74.9	4					93.1	7	74.8	1	86.4	3	64.4	1	89.4	2	88.3	3	89.4	10	90.8	2	86.8	4	95.7	3	93.8	2	95.7	11	95.7	28
		LNVRPSI	47.7	2	35.5	2	48.5	1					48.5	5	42.9	1	26.5	2					44.3	1	44.3	4	27.2	1	43.6	1			37.2	1	43.6	3	48.5	12
		SHIQENWR	25.7	1									25.7	1																	24.9	1			24.9	1	25.7	2
		SLLEEDAIR	69.5	1	57.5	1							69.5	2	39.6	1	49.3	1			25.6	1	45.8	1	49.3	4	66.2	2							66.2	2	69.5	8
		WIDALSDPR					58.5	1					58.5	1					39.5	1			27.1	1	39.5	2					35.6	1			35.6	1	58.5	4
AT4G35250.1	NAD(P)-binding Rossmann-fold superfamily protein chr4:16771401-16773269 REVERSE LENGTH=395	ALDEGYDVR													24	1	21.7	1							24	2											24	2
		LAGQDANVTTVPVSVLR													47.5	1									47.5	1											47.5	1
		SVWGTDAPTR									35.8	1	35.8	1																							35.8	1
AT4G36400.1,AT4G36400.2	FAD-linked oxidases family protein chr4:17197265-17200472 FORWARD LENGTH=559	GSISAEHGLGVMK									50	1	50	1																							50	1
		IREGITEALQK									41	1	41	1	33.2	1									33.2	1											41	2
		SVSGFVNHYKSK	28.1	1									28.1	1																							28.1	1
AT4G37930.1	SHM1, STM, SHMT1 serine transhydroxymethyltransferase 1 chr4:17831891-17834742 REVERSE LENGTH=517	FAQTLmER	29.5	1									29.5	1																							29.5	1
		GAmIFFR	25	1			42.5	1					42.5	2			41.1	2							41.1	2			23.1	1					23.1	1	42.5	5
		GFVEEDFAK	28.2	1									28.2	1																							28.2	1
		GIDGSRVEK			23.6	1							23.6	1					30.5	1					30.5	1	39.2	1							39.2	1	39.2	3
		LIVAGASAYAR	38.8	1	61.6	1	68	2					68	4																							68	4
		mGTPALTSR	27.6	1									27.6	1																							27.6	1
		NTVPGDVSAmVPGGIR																									22.7	1							22.7	1	22.7	1
		SATLFRPK															28.2	1					25.6	1	28.2	2			27.9	1					27.9	1	28.2	3
AT4G38970.1	FBA2 fructose-bisphosphate aldolase 2 chr4:18163714-18165659 REVERSE LENGTH=398	AKANSLAQLGK	54.4	2	44.7	1	67.1	1					67.1	4	51.1	1	62.7	3			23.6	1	70.1	1	70.1	6	64.2	1			63.2	1			64.2	2	70.1	12
		ANSLAQLGK	37.3	1									37.3	1																							37.3	1
		ATPEQVAAYTLK	44.8	2	67.7	1	47.6	1	41.5	1	38.4	1	67.7	6	67.5	1	68.7	2			43.1	1	68.9	2	68.9	6	46.3	2	40.3	1	61.7	2	42.8	1	61.7	6	68.9	18
		DRATPEQVAAYTLK					68.4	1					68.4	1	53.8	1							54.4	1	54.4	2	31.4	1			49.2	1			49.2	2	68.4	5
		EAAWGLAR															43.4	1							43.4	1	33.7	1							33.7	1	43.4	2
		GILAmDESNATcGK					89.8	1					89.8	1									22.3	1	22.3	1											89.8	2
		LDSIGLENTEANR	68.8	1			54	1					68.8	2	86.8	1	92.7	1							92.7	2											92.7	4
		RLDSIGLENTEANR	56.8	2	40.5	1					49.8	1	56.8	4	78	2	76.6	1	49.6	1					78	4	63.5	2							63.5	2	78	10
		RLDSIGLENTEANRQAFR	19.2	1			46.8	1					46.8	2			53.7	1					34.3	1	53.7	2					44	1			44	1	53.7	5
		TAAYYQQGAR	41.3	2	31.6	2	45.6	1					45.6	5	50.2	1	47.2	2					56.3	1	56.3	4	52.1	4			38	1	26	1	52.1	6	56.3	15
		TIASPGR	32.3	1									32.3	1																							32.3	1
		TVVSIPNGPSALAVK					48.5	1					48.5	1	34.1	1									34.1	1					26.4	1			26.4	1	48.5	3
		TWGGRPENVNAAQTTLLAR					28.6	1					28.6	1	79	1	55.6	1	38.4	1					79	3	56.7	1							56.7	1	79	5
AT5G01410.1	PDX1, ATPDX1.3, RSR4, PDX1.3, ATPDX1 Aldolase-type TIM barrel family protein chr5:172576-173505 REVERSE LENGTH=309	GGVImDVVNAEQAR					53.2	1					53.2	1									71.6	1	71.6	1											71.6	2
		IREGAAmIR																					27.5	1	27.5	1											27.5	1
		KLAAPYDLVmQTK																					58.2	1	58.2	1					43.7	1			43.7	1	58.2	2
		TKGEAGTGNIIEAVR	31.2	2			108	2					108	4									74.9	1	74.9	1											108	5
		VGLAQmLR	57.4	1									57.4	1													57.3	1							57.3	1	57.4	2
AT5G01530.1	LHCB4.1 light harvesting complex photosystem II chr5:209084-210243 FORWARD LENGTH=290	FFDPLGLAADPEK	95.4	1									95.4	1	68.3	2	79.4	1							79.4	3	78.2	1	46.4	1					78.2	2	95.4	6
		FFDPLGLAADPEKTAQLQLAEIK	40.2	1									40.2	1	57.2	1									57.2	1											57.2	2
		NAELDSEKR	39.2	4									39.2	4	42.8	2									42.8	2	33.5	1							33.5	1	42.8	7
		NLAGDVIGTR	57.8	2			42.4	1			32.5	1	57.8	4									44	1	44	1											57.8	5
		NLAGDVIGTRTEAADAK	77.8	3			38	2			76.8	2	77.8	7	70.6	2	66.2	4	48.8	3			55.9	2	70.6	11	76	2	62.8	2	61.6	2			76	6	77.8	24
		RLYPGGK					31.2	1					31.2	1									28.3	1	28.3	1	24.1	1			31.4	1			31.4	2	31.4	4
		STPFQPYSEVFGIQR	81.7	1			82.3	1			44.4	1	82.3	3	74.9	3	79.9	1					63.5	2	79.9	6	93.9	1	24.1	1	71.7	2			93.9	4	93.9	13
		TAQLQLAEIK	42.9	1									42.9	1																							42.9	1
AT5G02490.1	Heat shock protein 70 (Hsp 70) family protein chr5:550296-552565 REVERSE LENGTH=653	ATAGDTHLGGEDFDNR							53.4	2			53.4	2	45.6	1									45.6	1					18.8	1			18.8	1	53.4	4
		DAGVIAGLNVLR													55.9	1							41	1	55.9	2					31.7	1			31.7	1	55.9	3
		IINEPTAAAIAYGLDK							50.1	1			50.1	1	52.3	3							135	1	135	4	74	2			29.2	1			74	3	135	8
		IINEPTAAAIAYGLDKK							29	1			29	1	35.2	1									35.2	1					23.3	1			23.3	1	35.2	3
		LSKEDIEK													27.2	1									27.2	1	25.1	1							25.1	1	27.2	2
		MVNHFVQEFK							39.4	2			39.4	2																							39.4	2
		NALENYAYNmR	42.6	2					68.9	2			68.9	4	62.7	2									62.7	2	65.5	1			80.6	1			80.6	2	80.6	8
		NAVVTVPAYFNDSQR							55.4	2			55.4	2	33.3	1							49.1	2	49.1	3	58.6	1			45.5	1			58.6	2	58.6	7
		NKITITNDKGR																					37.5	1	37.5	1											37.5	1
		NQVAMNPVNTVFDAK							72.8	2			72.8	2	44.8	1							65.1	1	65.1	2	39.9	1							39.9	1	72.8	5
		NQVAmNPVNTVFDAKR																													22.8	1			22.8	1	22.8	1
		NTIRDEKIGEK																									21.4	1							21.4	1	21.4	1
		NVLIFDLGGGTFDVSLLTIEEGIFEVK																					39.2	4	39.2	4											39.2	4
		QFAAEEISSmVLIK	44.7	1									44.7	1																							44.7	1
		TTPSYVAFTDSER	35.9	1					85.6	1			85.6	2	90.7	1									90.7	1					67.9	2			67.9	2	90.7	5
AT5G02500.1	HSC70-1, HSP70-1, AT-HSC70-1, HSC70 heat shock cognate protein 70-1 chr5:554055-556334 REVERSE LENGTH=651	ATAGDTHLGGEDFDNR							53.4	2			53.4	2	45.6	1					21.8	1			45.6	2					18.8	1	24.8	1	24.8	2	53.4	6
		DAGVIAGLNVMR	32.2	1					78	2			78	3	48.5	2	70.2	2	56.8	1	39.4	1	58.9	1	70.2	7	78.9	2	64.5	1	24.8	1	59.5	1	78.9	5	78.9	15
		DITGNPR							23.9	1			23.9	1																							23.9	1
		IINEPTAAAIAYGLDK					28.1	1	50.1	1			50.1	2	52.3	3	54.4	1			75.7	1	135	1	135	6	74	2			29.2	1	75.6	1	75.6	4	135	12
		IINEPTAAAIAYGLDKK							29	1			29	1	35.2	1					27.7	1			35.2	2					23.3	1			23.3	1	35.2	4
		LSKDEIEK													27.2	1									27.2	1	24.5	1							24.5	1	27.2	2
		MVNHFVQEFK							39.4	2			39.4	2																							39.4	2
		NALENYAYNmR	42.6	2			26.4	1	68.9	2			68.9	5	62.7	2	64.6	2			46.9	2			64.6	6	65.5	1			80.6	1			80.6	2	80.6	13
		NAVVTVPAYFNDSQR							55.4	2			55.4	2	33.3	1					45.7	1	49.1	2	49.1	4	58.6	1			45.5	1	35.3	1	58.6	3	58.6	9
		NKITITNDKGR																					37.5	1	37.5	1											37.5	1
		NQVAMNPVNTVFDAK							72.8	2			72.8	2	44.8	1					46.3	1	65.1	1	65.1	3	39.9	1					51.5	1	51.5	2	72.8	7
		NQVAmNPVNTVFDAKR															25.5	2							25.5	2					22.8	1			22.8	1	25.5	3
		NVLIFDLGGGTFDVSLLTIEEGIFEVK					32.7	3			45.8	1	45.8	4									39.2	4	39.2	4											45.8	8
		SKKDITGNPR	41.1	2					35.6	1			41.1	3			30.6	1							30.6	1	42.8	2	28.4	1	44.2	1			44.2	4	44.2	8
		TTPSYVAFTDSER	35.9	1					85.6	1			85.6	2	90.7	1					55.1	1			90.7	2					67.9	2	71.8	1	71.8	3	90.7	7
AT5G04140.1,AT5G04140.2	GLU1, GLS1, GLUS, FD-GOGAT glutamate synthase 1 chr5:1130031-1138186 FORWARD LENGTH=1622	SGSQLLVLSDR																									43.5	1							43.5	1	43.5	1
		SSTVmENEEILR	41.8	2	32	1							41.8	3	57	1	48	1							57	2	54.8	1			66.1	1			66.1	2	66.1	7
		VTAPAGELQLK																													28.7	1			28.7	1	28.7	1
AT5G06320.1	NHL3 NDR1/HIN1-like 3 chr5:1931016-1931711 REVERSE LENGTH=231	IGVYYDEIEVR																			62.6	1			62.6	1							58.1	1	58.1	1	62.6	2
		LVGQQLVLLDGGERK							30.7	1			30.7	1							28.6	1			28.6	1											30.7	2
AT5G07030.1	Eukaryotic aspartyl protease family protein chr5:2183600-2185717 REVERSE LENGTH=455	LAKPVYEAVR													22.4	1									22.4	1											22.4	1
		LGPTSQPQR													37.8	1									37.8	1											37.8	1
		VLIDVPNGR							39.2	2			39.2	2																							39.2	2
AT5G08670.1,AT5G08680.1,AT5G08690.1	ATP synthase alpha/beta family protein chr5:2818395-2821149 REVERSE LENGTH=556	DAPALVDLATGQEILATGIK													126	3									126	3	62	1							62	1	126	4
		GGKIGLFGGAGVGK	48.2	1	45	1	35.1	1					48.2	3	71.9	1	23.9	1	41.5	2					71.9	4	55.4	2							55.4	2	71.9	9
		IGLFGGAGVGK	45.7	1	47.3	1	50	1					50	3	34.1	1	48.4	2	48.8	2	37.7	1			48.8	6	48.7	4	42.4	1	50.3	1	56.2	2	56.2	8	56.2	17
		KVLNTGAPITVPVGR			27.8	1							27.8	1			42.6	2							42.6	2	36	1			24.4	1			36	2	42.6	5
		mLSPHILGEEHYNTAR			30.1	1	46.9	1					46.9	2			43.3	2	38	1			33.1	1	43.3	4			38.1	1	40.7	1			40.7	2	46.9	8
		TIAMDGTEGLVR	59.6	3	52.7	2	29.5	1					59.6	6	50.9	2	52.1	3	74.2	2					74.2	7	87.8	2	67.3	2	79.5	2			87.8	6	87.8	19
		TVLImELINNVAK													35.1	1	37.2	1							37.2	2			51.5	1					51.5	1	51.5	3
		VLNTGAPITVPVGR	63.7	3	64.7	1	51.2	1					64.7	5	74.3	1	52.8	2	26.4	1			42.5	1	74.3	5	60.4	2					28.9	1	60.4	3	74.3	13
		VVDLLAPYQR	31.9	1	39.1	1	28.9	1					39.1	3			36	2	41.2	1					41.2	3	46.6	2	51	1	57.7	1			57.7	4	57.7	10
AT5G09650.1	AtPPa6, PPa6 pyrophosphorylase 6 chr5:2991331-2993117 REVERSE LENGTH=300	FGLGDKPANKDYALK													31.6	1									31.6	1											31.6	1
		IIQETNESWAK													39.3	1									39.3	1											39.3	1
AT5G09660.1,AT5G09660.2	PMDH2 peroxisomal NAD-malate dehydrogenase 2 chr5:2993645-2995551 REVERSE LENGTH=354	AGAGSATLSmAYAAAK					61.5	1					61.5	1	60.7	2	21.9	1					52.1	1	60.7	4					33.3	1			33.3	1	61.5	6
		ANTFVAEVLGLDPR															35.1	1							35.1	1											35.1	1
		GVEFIRK													23.5	1									23.5	1					31.9	1			31.9	1	31.9	2
		IQNGGTEVVEAK					35.2	1					35.2	1	35	1	59.8	1					30.2	1	59.8	3											59.8	4
		LLGVTTLDVAR	49.5	1			36.3	1					49.5	2			41	1					29.5	1	41	2					24.3	1			24.3	1	49.5	5
		TGAEEVYQLGPLNEYER															29.5	1					34.4	1	34.4	2					58.7	1			58.7	1	58.7	3
AT5G09730.1	BXL3, ATBXL3, XYL3, ATBX3, BX3 beta-xylosidase 3 chr5:3015319-3018226 REVERSE LENGTH=773	DVcTADNQELAR									54.6	1	54.6	1																							54.6	1
		GLQETDGGDPNRLK									30.2	1	30.2	1																							30.2	1
		GQETPGEDPTLSSK									43.3	1	43.3	1																							43.3	1
		NSAGSLPLSPSAIK									35.8	1	35.8	1																							35.8	1
		TPEEAVAK									43	1	43	1																							43	1
AT5G09810.1	ACT7 actin 7 chr5:3052809-3054220 FORWARD LENGTH=377	AGFAGDDAPR	70	2	67.9	3	65.5	3	58.9	1	28.1	2	70	11	83.7	2	67.5	2	72.4	2	74.4	1	79.1	1	83.7	8	57	2	60.8	3	74.5	1	74.7	1	74.7	7	83.7	26
		AVFPSIVGRPR					46.5	2			32.7	1	46.5	3	49.8	1	34.3	2			40.7	2	44.7	2	49.8	7	27	1			56.6	2	33.7	2	56.6	5	56.6	15
		DAYVGDEAQSK	33.7	1									33.7	1			48.6	2							48.6	2	45.4	1							45.4	1	48.6	4
		DAYVGDEAQSKR	24.1	1							45.9	1	45.9	2			47	1					44.8	1	47	2	31.6	1			31.1	1			31.6	2	47	6
		EITALAPSSmK									39	3	39	3	40.6	3					48.8	1			48.8	4			28.8	1	31	1	38.1	2	38.1	4	48.8	11
		EITALAPSSmKIK																													25.3	1			25.3	1	25.3	1
		GYmFTTTAER													43.1	1									43.1	1											43.1	1
		HTGVmVGmGQKDAYVGDEAQSK																					23.8	1	23.8	1											23.8	1
		HTGVmVGmGQKDAYVGDEAQSKR					40.9	1					40.9	1									26.6	2	26.6	2											40.9	3
		IKVVAPPERK																													26.5	1			26.5	1	26.5	1
		mSKEITALAPSSmK					32	1					32	1	51.3	2							47.2	1	51.3	3					65.3	2			65.3	2	65.3	6
		NYELPDGQVITIGAER													70.7	1									70.7	1					79.4	1			79.4	1	79.4	2
		VAPEEHPVLLTEAPLNPK							19.8	1			19.8	1	74.6	4					37.8	1	37	3	74.6	8	25.8	1	42.9	2	28.6	1	48.2	3	48.2	7	74.6	16
		VVAPPERK	30.1	1									30.1	1													27.1	1	35.1	1					35.1	2	35.1	3
AT5G10450.1,AT5G10450.2,AT5G10450.3,AT5G10450.4	GRF6, AFT1, 14-3-3lambda G-box regulating factor 6 chr5:3284452-3286261 REVERSE LENGTH=248	AAQDIAAADmAPTHPIR													33	1									33	1					33.6	1			33.6	1	33.6	2
		IVSSIEQKEESR	73.9	1									73.9	1			32.9	1							32.9	1					23.6	1			23.6	1	73.9	3
		KTAAEDTmLAYK													40.3	1									40.3	1											40.3	1
		LAEQAER	28.5	1									28.5	1																							28.5	1
AT5G10770.1	Eukaryotic aspartyl protease family protein chr5:3403331-3405331 REVERSE LENGTH=474	DKLSFPSQTATAYNK													65.4	1									65.4	1											65.4	1
		TcYDQKEPIFNPSK													36.2	1									36.2	1											36.2	1
AT5G12250.1	TUB6 beta-6 tubulin chr5:3961317-3962971 REVERSE LENGTH=449	AILmDLEPGTmDSVR																			29.5	1			29.5	1	25.1	1	33.4	1	29.9	1	53.1	1	53.1	4	53.1	5
		EVDEQmINVQNK																									29.6	1			29.2	1			29.6	2	29.6	2
		GKmSTKEVDEQmINVQNK																					23	1	23	1											23	1
		LAVNLIPFPR					56.6	2					56.6	2									73.1	2	73.1	2	65.9	2	76.8	3	76.5	3	57.9	2	76.8	10	76.8	14
		LHFFmVGFAPLTSR					24.1	1					24.1	1																							24.1	1
		mmLTFSVFPSPK																									46	1							46	1	46	1
		VNVYYNEAScGR																			75.5	1			75.5	1							54.7	1	54.7	1	75.5	2
		YLTASAMFR																					24	1	24	1	28.6	1	29.2	1					29.2	2	29.2	3
		YVGNSDLQLER					36.2	1					36.2	1							51.7	1			51.7	1							33.9	1	33.9	1	51.7	3
AT5G14040.1	PHT3;1 phosphate transporter 3;1 chr5:4531059-4532965 REVERSE LENGTH=375	GATVGDAVKK																													32.3	1			32.3	1	32.3	1
		KIGmVGLFTR																					40.2	1	40.2	1					51.1	2			51.1	2	51.1	3
		VQTQPGFAR																	34.9	1					34.9	1											34.9	1
AT5G14740.2	CA2, CA18, BETA CA2 carbonic anhydrase 2 chr5:4760536-4762382 FORWARD LENGTH=259	EAVNVSLANLLTYPFVR	58.1	1									58.1	1	81	1									81	1	41.2	1			58.7	1			58.7	2	81	4
		EKYETNPALYGELAK	57.9	2			55.3	2			80.7	1	80.7	5	74.9	2	63.6	3					60	2	74.9	7	83.8	1	62.6	3	84.3	3			84.3	7	84.3	19
		EKYETNPALYGELAKGQSPK	57.7	2			50.6	1					57.7	3			50.6	1					46.9	1	50.6	2	48.1	1	54.4	1	48.8	1			54.4	3	57.7	8
		GNESYEDAIEALKK	28.2	1									28.2	1																							28.2	1
		IcLPAK	27.7	1									27.7	1																							27.7	1
		IKEGFVTFKK	41.7	2									41.7	2	31.8	1							30.4	1	31.8	2					39.1	1			39.1	1	41.7	5
		ITAELQAASSSDSK	29.2	1			43.1	1					43.1	2	96.5	1									96.5	1											96.5	3
		LLIEKDDLKDVAAAK	46.8	1			30	2					46.8	3													32.5	1					32.2	1	32.5	2	46.8	5
		NIANMVPPFDK	35	1			50.1	1					50.1	2													39.1	2							39.1	2	50.1	4
		NIANMVPPFDKVK	53.2	2			60.2	3					60.2	5	53.6	2	37.4	2							53.6	4	34.2	1	33	1					34.2	2	60.2	11
		SFDPVER	24.8	1									24.8	1																							24.8	1
		VENIVVIGHSAcGGIK					23.5	1					23.5	1																							23.5	1
		YETNPALYGELAK	46.5	2			44.4	1			40.1	1	46.5	4	31.3	1							70.5	1	70.5	2	32.7	1			84.3	1	30	1	84.3	3	84.3	9
		YETNPALYGELAKGQSPK					32.2	1					32.2	1																							32.2	1
		YmVFAcSDSR	50.1	1			47.2	1					50.1	2	25.5	1							47.6	1	47.6	2					50.2	1			50.2	1	50.2	5
AT5G16050.1	GRF5, GF14 UPSILON general regulatory factor 5 chr5:5244008-5245402 REVERSE LENGTH=268	EAAESTLVAYK	26.5	1									26.5	1			41.3	1							41.3	1											41.3	2
		LAEQAER	28.5	1									28.5	1																							28.5	1
		TVETEELTVEER													56.9	1									56.9	1											56.9	1
AT5G16710.1	DHAR3 dehydroascorbate reductase 1 chr5:5483312-5484926 FORWARD LENGTH=258	IFSTFVGFLK	28.8	1									28.8	1			25.9	1							25.9	1											28.8	2
		SYmENVFSR	23	1									23	1																							23	1
AT5G17920.1,AT5G17920.2	ATCIMS, ATMETS, ATMS1 Cobalamin-independent synthase family protein chr5:5935771-5939195 FORWARD LENGTH=765	AAAALKGSDHRR	37.4	1	23.2	1							37.4	2	26.6	1			39.3	1					39.3	2					26.5	1			26.5	1	39.3	5
		AIKEEIK																									32.8	1							32.8	1	32.8	1
		AIKEEIKK	30.4	2	41.3	1					25.4	1	41.3	4			32.2	3	39	1					39	4					31.4	2			31.4	2	41.3	10
		AVNEYKEAK	25.8	1									25.8	1																							25.8	1
		GGIGVIQIDEAALR													59.1	1	53.4	1					73.3	2	73.3	4	31.5	1			41	1			41	2	73.3	6
		GNASVPAmEmTK	34.3	1									34.3	1			28.7	1					34.4	1	34.4	2	31.6	1							31.6	1	34.4	4
		GVDKSFELLSLLPK															30.2	1					23.2	2	30.2	3											30.2	3
		GVTAFGFDLVR															56	1							56	1											56	1
		KYTEVKPALK															32.5	1							32.5	1											32.5	1
		KYTEVKPALKNmVDAAK					18.6	1					18.6	1																	36	1			36	1	36	2
		SDEKLLSVFR															25.9	1							25.9	1											25.9	1
		YGAGIGPGVYDIHSPR					25.6	1					25.6	1									30.2	1	30.2	1					35.8	1			35.8	1	35.8	3
		YLFAGVVDGR	32	1									32	1	30.9	2	54.6	2							54.6	4	33	2							33	2	54.6	7
		YTEVKPALKNmVDAAK															31.7	1	34	1					34	2	21.6	1			31.8	1			31.8	2	34	4
AT5G19550.1	ASP2, AAT2 aspartate aminotransferase 2 chr5:6598201-6601597 FORWARD LENGTH=405	KAEQQLVNDPSR													34.9	1									34.9	1											34.9	1
		LILGADSPAITESR													78.3	1									78.3	1											78.3	1
AT5G20010.1,AT5G20020.1,AT5G55190.1	RAN-1, RAN1, ATRAN1 RAS-related nuclear protein-1 chr5:6760364-6761747 FORWARD LENGTH=221	HLTGEFEK	26.4	1			46.9	1					46.9	2									34.1	1	34.1	1			26	1	21.5	1			26	2	46.9	5
		KKNLQYYEISAK					48.5	1					48.5	1																							48.5	1
		LVIVGDGGTGK			37.6	1							37.6	1																							37.6	1
		NLQYYEISAK																	27.1	1					27.1	1											27.1	1
		SNYNFEKPFLYLAR					39.3	1					39.3	1			43.5	1					47.7	1	47.7	2					40.1	1			40.1	1	47.7	4
AT5G20630.1	GLP3, GLP3A, GLP3B, ATGER3, GER3 germin 3 chr5:6975315-6975950 REVERSE LENGTH=211	AAVTPAFAPAYAGINGLGVSLAR	69.1	1					31.6	1			69.1	2	85.3	1	45.6	1							85.3	2					86.7	1			86.7	1	86.7	5
		GPQSPSGYScK													33	1									33	1											33	1
		LKGVLGGTN	51.9	1	41.2	1							51.9	2	33.4	1			42.5	1					42.5	2											51.9	4
AT5G20720.1,AT5G20720.2,AT5G20720.3	CPN20, CPN10, CHCPN10, ATCPN21, CPN21 chaperonin 20 chr5:7015015-7016354 FORWARD LENGTH=253	TAGGLLLTETTK					48.3	1					48.3	1									46.1	1	46.1	1											48.3	2
		VAEAEEKTAGGLLLTETTK	37.2	1									37.2	1																							37.2	1
		YAGTEVEFNDVK	54.2	1									54.2	1																							54.2	1
AT5G20950.1,AT5G20950.2	Glycosyl hydrolase family protein chr5:7107609-7110775 REVERSE LENGTH=624	HFVGDGGTVR													36.6	1									36.6	1											36.6	1
		IGAATALEVR							82.4	1			82.4	1	82.4	2					91.3	1			91.3	3							77.1	1	77.1	1	91.3	5
		IGQMVQIER							51.4	1			51.4	1	65.1	1					42.7	1			65.1	2							51.8	1	51.8	1	65.1	4
		YFIGSVLSGGGSVPSEK													47	1									47	1											47	1
AT5G23120.1	HCF136 photosystem II stability/assembly factor, chloroplast (HCF136) chr5:7778154-7780463 FORWARD LENGTH=403	AADNIAANLYAVK																									34.1	1							34.1	1	34.1	1
		ADGGLWLLVR															64.9	1							64.9	1											64.9	1
		DKAADNIAANLYAVK													27.6	1									27.6	1											27.6	1
		GTGITEEFEEVPVQSR	46.4	1									46.4	1	52.2	1					57.6	1			57.6	2											57.6	3
AT5G23860.1,AT5G23860.2	TUB8 tubulin beta 8 chr5:8042962-8044528 FORWARD LENGTH=449	AVLmDLEPGTmDSVR	36.1	1									36.1	1	43.3	1	30.6	1	50.7	1	40.4	3	36.2	1	50.7	7	64.7	1	39.9	3	73.6	1	48.2	1	73.6	6	73.6	14
		EVDEQmINVQNK	31.7	1									31.7	1													29.6	1			29.2	1			29.6	2	31.7	3
		GKmSTKEVDEQmINVQNK																					23	1	23	1											23	1
		LAVNLIPFPR	48.2	1									48.2	1	42.1	1	65.4	2	63.3	4			73.1	2	73.1	9	65.9	2	76.8	3	76.5	3	57.9	2	76.8	10	76.8	20
		LHFFmVGFAPLTSR															46.2	2							46.2	2											46.2	2
		mmLTFSVFPSPK																									46	1							46	1	46	1
		mREILHIQGGQcGNQIGAK																					43	1	43	1											43	1
		NSSYFVEWIPNNVK															39.2	1	25.8	1					39.2	2											39.2	2
		SGPYGQIFRPDNFVFGQSGAGNNWAK																					27.8	1	27.8	1											27.8	1
		VNVYYNEAScGR																			75.5	1			75.5	1							54.7	1	54.7	1	75.5	2
		YLTASAMFR	25.6	1									25.6	1			29.2	1	32.4	1			24	1	32.4	3	28.6	1	29.2	1					29.2	2	32.4	6
AT5G24780.1	VSP1, ATVSP1 vegetative storage protein 1 chr5:8507783-8508889 REVERSE LENGTH=270	AYVEDYLITSK													56.1	1									56.1	1											56.1	1
		TVNKEAYFYAK													41.7	1									41.7	1											41.7	1
		VFKLPNPLYYVPS													53.3	2									53.3	2											53.3	2
AT5G25980.2	TGG2, BGLU37 glucoside glucohydrolase 2 chr5:9072730-9075477 FORWARD LENGTH=547	ASGLWYQSFLR							42.2	1			42.2	1																							42.2	1
		FSFAWSR							28.3	1			28.3	1																							28.3	1
		GmLNVmEHFK							18.6	1			18.6	1									35.2	1	35.2	1	50.7	1							50.7	1	50.7	3
		GSYYHPR	25.9	1									25.9	1	23.6	1			28	2			28	1	28	4	43.8	1			34.1	1			43.8	2	43.8	7
		GYALGTDAPGR							58.1	1			58.1	1							44.4	2	28.4	1	44.4	3					34.5	1			34.5	1	58.1	5
		IGPVmITR					40.6	1	55.1	1			55.1	2	40.7	1					44.6	1			44.6	2	61	1	44.4	1					61	2	61	6
		TRYKYQGGK	32.5	1									32.5	1																	23.6	1			23.6	1	32.5	2
AT5G26000.1	TGG1, BGLU38 thioglucoside glucohydrolase 1 chr5:9079678-9082347 REVERSE LENGTH=541	FSIAWSR																									34.9	1							34.9	1	34.9	1
		GIYYVmDYFK	44.2	1									44.2	1									41.8	1	41.8	1					33.4	1			33.4	1	44.2	3
		GYALGTDAPGR																					28.4	1	28.4	1					34.5	1			34.5	1	34.5	2
		LFNSGNFEK																									47.1	1							47.1	1	47.1	1
		VIKEKNVNVK																									25.6	1							25.6	1	25.6	1
		YKDDQKGmIGPVmITR																													26	1			26	1	26	1
AT5G26742.1,AT5G26742.2	emb1138 DEAD box RNA helicase (RH3) chr5:9285540-9288871 REVERSE LENGTH=747	AVLVPALQGR																															32.5	1	32.5	1	32.5	1
		FLVLAPTRELAK							31	1			31	1																							31	1
		GSSDDWLIGGR							68.6	1			68.6	1							57.8	1			57.8	1							44.3	1	44.3	1	68.6	3
		GVDVVVGTPGR							45.2	1			45.2	1																							45.2	1
		IIDLIEGR							42.2	1			42.2	1							46.3	1			46.3	1							44.3	1	44.3	1	46.3	3
		LPPLQDDGPSSDNYGR							68.5	1			68.5	1							53.5	1			53.5	1											68.5	2
		LTEEAGDYTAFR							64.9	1			64.9	1																							64.9	1
		LTEEAGDYTAFRR							23.4	1			23.4	1							23.4	1			23.4	1											23.4	2
		RLTEEAGDYTAFRR							21.5	1			21.5	1							22.1	1			22.1	1											22.1	2
		TLAFGIPIIK							26.4	1			26.4	1							34.6	1			34.6	1											34.6	2
		TLAFGIPIIKR							36	1			36	1																							36	1
AT5G28540.1	BIP1 heat shock protein 70 (Hsp 70) family protein chr5:10540665-10543274 REVERSE LENGTH=669	AmDDAGLQK													28.1	1					27.9	1			28.1	2							28.7	1	28.7	1	28.7	3
		ARFEELNNDLFR																															22.3	1	22.3	1	22.3	1
		ARFEELNNDLFRK																															36.6	1	36.6	1	36.6	1
		DAGVIAGLNVAR							35	1			35	1	34.6	2	44.5	1	45	1	60.7	1	47.2	1	60.7	6	63.7	2					55	1	63.7	3	63.7	10
		IINEPTAAAIAYGLDK							50.1	1			50.1	1	52.3	3	54.4	1			75.7	1	135	1	135	6	74	2			29.2	1	75.6	1	75.6	4	135	11
		IINEPTAAAIAYGLDKK							29	1			29	1	35.2	1					27.7	1			35.2	2					23.3	1			23.3	1	35.2	4
		ITPSWVGFTDSER							31	1			31	1							36.4	1	64.4	2	64.4	3					26.9	1	41	1	41	2	64.4	6
		LIGEAAKNQAAVNPER																	47.1	1					47.1	1	72.1	2					31.6	1	72.1	3	72.1	4
		NQAAVNPER													39.8	1			24.6	1	36.4	1	33.9	1	39.8	4					44.8	1	55.8	1	55.8	2	55.8	6
		SGGAPGGAGGESSTEEEDESHDEL																													84.3	2			84.3	2	84.3	2
AT5G35360.1,AT5G35360.2,AT5G35360.3	CAC2 acetyl Co-enzyme a carboxylase biotin carboxylase subunit chr5:13584300-13588268 FORWARD LENGTH=537	ITSYLPSGGPFVR					34.5	1					34.5	1																							34.5	1
		LAKEPGEFVK	25.4	1	23.6	1	31.1	1					31.1	3													33.2	1			22.1	1			33.2	2	33.2	5
		VANEIGFPVmIK			29.1	1							29.1	1			45.7	2							45.7	2	27.6	2	33.2	2					33.2	4	45.7	7
AT5G35630.1,AT5G35630.2,AT5G35630.3	GS2, GLN2, ATGSL1 glutamine synthetase 2 chr5:13831220-13833239 FORWARD LENGTH=430	AAEIFSNKK			25.5	1	30.3	1					30.3	2													34.1	2							34.1	2	34.1	4
		AILNLSLR					40.2	2					40.2	2									28.5	2	28.5	2					30.7	1			30.7	1	40.2	5
		AKAAEIFSNKK	26.1	1							28.5	1	28.5	2	30.1	1							31	1	31	2											31	4
		HKEHISAYGEGNER	50.2	2			38	1					50.2	3			58.1	1							58.1	1											58.1	4
		SmREEGGFEVIKK	21.3	1			44	2					44	3			25.5	1			24.3	1	41.8	1	41.8	3					50.9	1			50.9	1	50.9	7
		TIEKPVEDPSELPK									33	1	33	1	37.2	1	39.1	1			22.4	1			39.1	3											39.1	4
		YLLER													28	1									28	1											28	1
AT5G38410.1,AT5G38410.2,AT5G38410.3,AT5G38420.1	Ribulose bisphosphate carboxylase (small chain) family protein chr5:15377501-15378306 REVERSE LENGTH=181	EVDYLLR																									35	1							35	1	35	1
		EVEEcKKEYPGAFIR	27.4	1									27.4	1																							27.4	1
		EYPGAFIR																	32.4	1					32.4	1	24.7	1	27.9	1					27.9	2	32.4	3
		IIGFDNTR	37	3	33.8	4	34.1	2					37	9	29.9	2	35.2	3	32.3	2			24.9	1	35.2	8	39.5	3	32.1	2	39.7	1	30.5	1	39.7	7	39.7	24
		IIGFDNTRQVQcISFIAYKPPSFTEA	25.3	1									25.3	1																							25.3	1
		KFETLSYLPDLSDVELAK	36.9	1									36.9	1																							36.9	1
		KFETLSYLPDLSDVELAKEVDYLLR	74.8	1									74.8	1																							74.8	1
		KKFETLSYLPDLSDVELAK	30.6	1									30.6	1																							30.6	1
		LPLFGcTDSAQVLK					72.5	1					72.5	1			60	1					83.4	1	83.4	2											83.4	3
		QVQcISFIAYKPPSFTEA	33.3	1									33.3	1																							33.3	1
AT5G39740.1,AT5G39740.2	OLI7, RPL5B ribosomal protein L5 B chr5:15903365-15905185 FORWARD LENGTH=301	ALLDVGLIR					28.3	1	63.3	1			63.3	2							60.8	1	60.2	1	60.8	2					41	1	60.8	1	60.8	2	63.3	6
		VKALNGAGGDDDDEDDEE																															57	1	57	1	57	1
AT5G42080.1,AT5G42080.3	ADL1, ADL1A, AG68, DRP1A, RSW9, DL1 dynamin-like protein chr5:16820661-16824536 REVERSE LENGTH=610	AAQSEIDAVAWSK							51	1			51	1																							51	1
		RPLVLQLQK							18.7	1			18.7	1																							18.7	1
AT5G42270.1	VAR1, FTSH5 FtsH extracellular protease family chr5:16902659-16905102 FORWARD LENGTH=704	AKEIITTQIDILHK	24.2	1									24.2	1																							24.2	1
		IIAGPEKK	33.8	2									33.8	2			37	2							37	2	30.7	1							30.7	1	37	5
		NAVVSEEKKR	29.2	2									29.2	2			21.9	1							21.9	1	28.2	1							28.2	1	29.2	4
		SYLENQmAVALGGR																					71.9	1	71.9	1											71.9	1
AT5G43980.1	PDLP1, PDLP1A plasmodesmata-located protein 1 chr5:17694817-17696458 REVERSE LENGTH=303	AKSEcGESNSGQVYLQK																	57.2	1	124	7	95.2	4	124	12	38	1	40.2	1	85	10	120	6	120	18	124	30
		DDGNVVAAR													52.9	1			58.1	1	53	2			58.1	4	62.8	2	63.5	2			58.5	2	63.5	6	63.5	10
		DSNDPGFVGK															44.6	2	58.5	2	53	1	39.8	1	58.5	6	64.2	5	50.6	3			52.8	2	64.2	10	64.2	16
		DSNDPGFVGKR													71.1	8	77.9	8	75.1	7	70.6	5	86.7	7	86.7	35	72.8	8	83.2	10	75.4	9	81.8	4	83.2	31	86.7	66
		DSNDPGFVGKRETAFGmAENGVK																					19.9	1	19.9	1					35.2	2	27.5	1	35.2	3	35.2	4
		ETAFGmAENGVK	48.6	2	32	1							48.6	3	52.3	2	53.2	4	69.2	4	74.6	6	58.2	3	74.6	19	85.4	6	51.1	3	64.2	14	86.1	2	86.1	25	86.1	47
		GcANQKSPDPTGVFSQNLK																			62.2	1	33	1	62.2	2					49.8	1	43.4	1	49.8	2	62.2	4
		GDLQNAQcYDcVSK													93.3	3	79.1	1	31.1	1	88.2	7	79.2	2	93.3	14	38.4	1			87.2	1	85.5	3	87.2	5	93.3	19
		GDLQNAQcYDcVSKIPK													31.3	1	32.5	1			40.8	2	54.6	5	54.6	9	34.3	1	39.1	2	56.5	6	39.7	3	56.5	12	56.5	21
		GDLQNAQcYDcVSKIPKLVSK																															23.8	1	23.8	1	23.8	1
		IPKLVSK															41.9	1	28.6	1	30.9	1	25.2	1	41.9	4	36.4	3	42.1	3	29.5	1	31.4	1	42.1	8	42.1	12
		KDSNDPGFVGK													32.2	1	48.7	1	55.2	1	63.3	1	38	1	63.3	5	55.2	1	60.3	2	30.2	1	48.8	1	60.3	5	63.3	10
		KDSNDPGFVGKR			23.9	1							23.9	1	48	3	51.8	4	60.4	7	70.1	4	57.8	2	70.1	20	53.9	7	68.2	6	56.1	5	76.2	4	76.2	22	76.2	43
		LcGGGRDDGNVVAAR	19.7	1									19.7	1	55.9	10	46.5	5	43.9	4	37.8	7	68.6	7	68.6	33	46.5	4	44.5	5	61.4	8	84.3	10	84.3	27	84.3	61
		LVSKLcGGGRDDGNVVAAR													42.9	3	46.2	4	33	3	21.2	1	42.1	2	46.2	13	49	3	44.8	5	41	3	22.2	1	49	12	49	25
		NLIFK																									29.7	1	25.2	1					29.7	2	29.7	2
		QTSGTEMLFR													53.8	5	60.6	10	68.1	10			42.7	2	68.1	27	73.2	9	57.9	10	65.3	3			73.2	22	73.2	49
		RETAFGmAENGVK													59.1	1	38.5	2	55.4	3	55.9	2	41.8	1	59.1	9	18	1	63.7	4	41.4	2	85.1	3	85.1	10	85.1	19
		RQHTER																													31.1	1			31.1	1	31.1	1
		SEcGESNSGQVYLQK																			68.3	4	67.9	2	68.3	6	58.9	1			69.8	3	80.5	5	80.5	9	80.5	15
		SPDPTGVFSQNLK	60.8	2	54.1	2					42.4	1	60.8	5	78.8	5	94.7	4	67.3	9	97.9	6	92.9	4	97.9	28	91.2	8	94.7	12	92.8	6	89.9	5	94.7	31	97.9	64
		VcGKKDSNDPGFVGK													40.9	1					35.8	2	41.7	2	41.7	5					40	3	41.4	3	41.4	6	41.7	11
		VHLAGcYIR													29.9	4	19.9	1	40.5	3	53.6	5	41.3	3	53.6	16	42.6	2	57.7	4	47.6	4	50.1	5	57.7	15	57.7	31
		YESSGFR													33.9	3	28.4	2	35.4	1	34.5	1	23.5	1	35.4	8	32.5	2			24.1	1			32.5	3	35.4	11
		YESSGFRQTSGTEmLFR													54.6	10	57.4	5	54.7	6	55	6	49.8	2	57.4	29	53	3	58.1	11	47.4	4	57.3	8	58.1	26	58.1	55
AT5G44020.1	HAD superfamily, subfamily IIIB acid phosphatase chr5:17712433-17714046 FORWARD LENGTH=272	APAVPHmVK																															20.5	1	20.5	1	20.5	1
		APNLNGYcESWR																			66.3	1			66.3	1							45.2	1	45.2	1	66.3	2
		AVDEAILYLGK							70.4	2	30.9	2	70.4	4	52.4	1					57.3	1			57.3	2							73.3	1	73.3	1	73.3	7
		IFLISSR							36.4	1			36.4	1							37.4	1			37.4	1							48.4	1	48.4	1	48.4	3
		TFKLPNSIYYVA							31.4	1			31.4	1							25.4	1			25.4	1							34.2	1	34.2	1	34.2	3
		TWLTSLGYR							41	1			41	1							36.8	1			36.8	1							49.5	1	49.5	1	49.5	3
		VNVELNNIRDFK													39.7	1					21.6	1			39.7	2											39.7	2
		VWGVmGAQWNSFSGcPVPK							55.8	2			55.8	2																							55.8	2
		YmTSSQYEDDVER							84.1	2			84.1	2							82.2	2			82.2	2							55	2	55	2	84.1	6
AT5G45890.1	SAG12 senescence-associated gene 12 chr5:18613300-18614759 FORWARD LENGTH=346	ATGGLTTESNYPYKGEDATcNSK													62	1									62	1											62	1
		ATGGLTTESNYPYKGEDATcNSKK													63.3	2									63.3	2											63.3	2
		ATSITGYEDVPVNDEQALmK													90.1	2									90.1	2											90.1	2
		DKQGLcGLAmK													32	1									32	1											32	1
AT5G46800.1	BOU Mitochondrial substrate carrier family protein chr5:18988779-18989810 REVERSE LENGTH=300	LQSQPTPAPGQLPR					43.7	1			29.1	1	43.7	2	43.8	1							54.2	1	54.2	2					46.5	1			46.5	1	54.2	5
		SVLQVDDYKNPR					29.6	1					29.6	1	52.2	1	35.8	1					66.8	1	66.8	3					78.8	1			78.8	1	78.8	5
		YGGPmDVAR																					66.3	1	66.3	1					77.2	1			77.2	1	77.2	2
		YTGAIDAVKQTVASEGTK																					43.1	1	43.1	1											43.1	1
		YTGSmDAFRK																													27.2	1			27.2	1	27.2	1
AT5G47210.1	Hyaluronan / mRNA binding family chr5:19169222-19171012 REVERSE LENGTH=357	ALQATKVEER																			62.4	1			62.4	1							67.1	1	67.1	1	67.1	2
		EAAAPAIGDTAQFPSLG																			73.1	2			73.1	2							46.4	1	46.4	1	73.1	3
		FPTKPAPPSQAVR																			25.1	1			25.1	1											25.1	1
		NTDEEIFIK																															28.7	1	28.7	1	28.7	1
		RGGVANGESGDVERPPR																			27.1	1			27.1	1							32.1	1	32.1	1	32.1	2
		VGGGREGPR																			31.1	1			31.1	1											31.1	1
AT5G48180.1	NSP5 nitrile specifier protein 5 chr5:19541283-19542358 REVERSE LENGTH=326	AVETTGDVPAAR													59.4	1									59.4	1											59.4	1
		LLAPVEEGLPGR													47.5	1									47.5	1											47.5	1
		VNTLHAYDVVDQK													69.9	1									69.9	1											69.9	1
AT5G49360.1	BXL1, ATBXL1 beta-xylosidase 1 chr5:20012179-20016659 REVERSE LENGTH=774	AcAYTSPLQGISR													45.5	1									45.5	1											45.5	1
		GLQGTAAGNR																									25.9	1							25.9	1	25.9	1
		GNQGFGAAEAAAR													54.3	1									54.3	1											54.3	1
		GQETPGEDPIVAAK													58.2	1									58.2	1											58.2	1
		TGLLLPGYQQDLVTR													45.2	1									45.2	1											45.2	1
AT5G49910.1	CPHSC70-2EAT SHOCK PROTEIN 70-2, HSC70-7, cpHsc70-2 chloroplast heat shock protein 70-2 chr5:20303470-20306295 FORWARD LENGTH=718	AVITVPAYFNDSQR							65.3	1			65.3	1									35.5	1	35.5	1											65.3	2
		DAIDTKNQADSVVYQTEK							27.8	1			27.8	1																							27.8	1
		DEGIDLLKDKQALQR							59.6	1			59.6	1																							59.6	1
		FLNDKVTK							33.1	1			33.1	1																							33.1	1
		GGDNGGDVIDADFTDSN							37.3	1			37.3	1																							37.3	1
		HIETTLTR							30.5	1			30.5	1																							30.5	1
		IINEPTAASLAYGFER							75.9	1			75.9	1									72.4	1	72.4	1											75.9	2
		IPAVQDLVR															33.7	1							33.7	1	22	1							22	1	33.7	2
		KLVDDASR							37.2	1			37.2	1																							37.2	1
		LTEAAEK							29	1			29	1																							29	1
		LTEAAEKAK							22.9	1			22.9	1																							22.9	1
		LVDDASR							32.8	1			32.8	1																							32.8	1
		LVGQIAKR							37.6	1			37.6	1																							37.6	1
		mNEVAEESK							43	2			43	2																							43	2
		MNEVAEESKQVSYR							53.6	2			53.6	2																							53.6	2
		NQADSVVYQTEK							29.9	1			29.9	1																							29.9	1
		TPVENSLR							49.2	1			49.2	1																							49.2	1
		TTPSVVAYTK							43.4	1			43.4	1																							43.4	1
AT5G52040.1,AT5G52040.2,AT5G52040.3,AT5G52040.4	ATRSP41, RS41, At-RS41 RNA-binding (RRM/RBD/RNP motifs) family protein chr5:21131081-21133318 FORWARD LENGTH=356	NFAFIQYEAQEDATR							93.2	1			93.2	1																							93.2	1
		RNFAFIQYEAQEDATR							65.8	2			65.8	2																							65.8	2
AT5G54270.1	LHCB3, LHCB3*1 light-harvesting chlorophyll B-binding protein 3 chr5:22038424-22039383 FORWARD LENGTH=265	ALEVIHGR	46.3	1									46.3	1	54.3	1			38.5	1	33.5	1			54.3	3							34.4	1	34.4	1	54.3	5
		VDFKEPVWFK	51.2	2									51.2	2	50.7	1	35.5	2					35.9	1	50.7	4	58.4	2	28.9	1	36.4	2			58.4	5	58.4	11
		VKEIKNGR													26.1	1									26.1	1											26.1	1
AT5G56010.1	HSP81-3, Hsp81.3, AtHsp90-3, AtHsp90.3 heat shock protein 81-3 chr5:22681410-22683911 FORWARD LENGTH=699	ADLVNNLGTIAR	36	1					30.5	1			36	2			49.4	2	25.9	1					49.4	3	46.5	1					34.1	1	46.5	2	49.4	7
		APFDLFDTK													28	1									28	1											28	1
		GIVDSEDLPLNISR																									26.7	1							26.7	1	26.7	1
		HNDDEQYVWESQAGGSFTVTR									50	4	50	4																							50	4
		KPEEINKEEYAAFYK															40.4	1							40.4	1											40.4	1
		mVLYLKEDQmEYIEER									21.3	1	21.3	1																							21.3	1
		RAPFDLFDTK	29.9	1									29.9	1	28.8	1	27.4	1					36.5	1	36.5	3											36.5	4
		SGTKEFmEALAAGADVSmIGQFGVGFYSAYLVADKVVVTTK									33.8	1	33.8	1	49.7	2									49.7	2											49.7	3
AT5G58290.1	RPT3 regulatory particle triple-A ATPase 3 chr5:23569155-23571116 FORWARD LENGTH=408	ANVKKPDTDFEFYK																													30.1	1			30.1	1	30.1	1
		KIEFPLPDRR																													21.4	1			21.4	1	21.4	1
AT5G59310.1	LTP4 lipid transfer protein 4 chr5:23925296-23925772 REVERSE LENGTH=112	GVNPSLASGLPGK													25.3	1									25.3	1											25.3	1
		LNGmAQTTPDR													27.6	1									27.6	1											27.6	1
AT5G59910.1	HTB4 Histone superfamily protein chr5:24127206-24127658 FORWARD LENGTH=150	AEKAPAEKKPK													21.2	1									21.2	1											21.2	1
		AmGImNSFINDIFEK							74.3	1			74.3	1																			34.2	1	34.2	1	74.3	2
		EIQTAVR							30.5	1			30.5	1	39.7	1					25.5	1			39.7	2											39.7	3
		KPASEKPVEEK							24.8	1			24.8	1																							24.8	1
		LVLPGELAK							39	2			39	2							39	1			39	1							37.7	3	37.7	3	39	6
		YNKKPTITSR	26.2	1					34.4	3	24.1	2	34.4	6	34.1	1	19.6	1			35	1			35	3							33	2	33	2	35	11
AT5G61410.1,AT5G61410.2	RPE, EMB2728 D-ribulose-5-phosphate-3-epimerase chr5:24684085-24685836 REVERSE LENGTH=281	ASKRPAAVAV					27.4	1					27.4	1									21.5	1	21.5	1	23.5	1			28	1			28	2	28	4
		LGEQVK	48.2	1			22.6	1					48.2	2			38.4	1	26.8	1					38.4	2			41.3	1					41.3	1	48.2	5
		SDIIVSPSILSANFAK	82.7	1			70	1					82.7	2			42.3	1					40	1	42.3	2	28.7	1	29.2	1					29.2	2	82.7	6
		VIEAGANALVAGSAVFGAK									78.9	8	78.9	8	69.2	6									69.2	6											78.9	14
AT5G61790.1	CNX1, ATCNX1 calnexin 1 chr5:24827394-24829642 REVERSE LENGTH=530	ANLLSGEDFEPALIPAK																											41.3	1			67.5	1	67.5	2	67.5	2
		SEGHEDYGLLVSEK																									18.2	1							18.2	1	18.2	1
		SGDEAEKKEETAAPR																					60.5	1	60.5	1	43.6	1			48.4	1			48.4	2	60.5	3
AT5G62690.1,AT5G62700.1	TUB2 tubulin beta chain 2 chr5:25181560-25183501 FORWARD LENGTH=450	AVLmDLEPGTmDSLR	42.4	1	44.1	1							44.1	2	63.8	2	56	3			42.1	3	57.3	2	63.8	10	39.5	3			58.4	2	65.7	2	65.7	7	65.7	19
		EVDEQmLNVQNK	31.7	1									31.7	1													29.6	1			29.2	1			29.6	2	31.7	3
		GKmSTKEVDEQmLNVQNK																					23	1	23	1											23	1
		INVYYNEAScGR																					45.2	1	45.2	1											45.2	1
		LAVNLIPFPR	48.2	1	45.7	1	56.6	2					56.6	4	42.1	1	65.4	2	63.3	4			73.1	2	73.1	9	65.9	2	76.8	3	76.5	3	57.9	2	76.8	10	76.8	23
		LHFFmVGFAPLTSR					24.1	1					24.1	1			46.2	2							46.2	2											46.2	3
		mmLTFSVFPSPK																									46	1							46	1	46	1
		mREILHIQGGQcGNQIGAK																					43	1	43	1											43	1
		NSSYFVEWIPNNVK															39.2	1	25.8	1					39.2	2											39.2	2
		YLTASAMFR	25.6	1									25.6	1			29.2	1	32.4	1			24	1	32.4	3	28.6	1	29.2	1					29.2	2	32.4	6
		YTGDSDLQLER	60.1	1	53.7	1	57	1					60.1	3					46.2	1	52.7	1			52.7	2	62.3	1	53.7	1			50.8	1	62.3	3	62.3	8
AT5G65010.1,AT5G65010.2	ASN2 asparagine synthetase 2 chr5:25969224-25972278 FORWARD LENGTH=578	AALGVHVAAYEEDKAAAAAK									29.8	3	29.8	3	22.2	1									22.2	1											29.8	4
		LmTDVPFGVLLSGGLDSSLVAAVALR									30.3	1	30.3	1																							30.3	1
AT5G66570.1	PSBO-1, OEE1, OEE33, OE33, PSBO1, MSP-1 PS II oxygen-evolving complex 1 chr5:26568744-26570124 FORWARD LENGTH=332	FLVPSYR					22.7	1					22.7	1									23.2	1	23.2	1	30.9	1							30.9	1	30.9	3
		GSSFLDPKGR																					48.6	1	48.6	1					34.3	1			34.3	1	48.6	2
		IQGVWYGQLE					21.5	1					21.5	1									27.3	1	27.3	1							24.4	1	24.4	1	27.3	3
		NAPPEFQNTK	34.9	1			22	1					34.9	2													36.5	1							36.5	1	36.5	3
		NAPPEFQNTKLmTR	34.1	1	24	1	49.1	2					49.1	4									54.7	1	54.7	1					59.3	1			59.3	1	59.3	6
		NTAASVGEITLK	66.5	2							42.2	1	66.5	3	77.8	1	60.2	1							77.8	2	59.8	1							59.8	1	77.8	6
		NTAASVGEITLKVTK																													74.8	1			74.8	1	74.8	1
		RLTYDEIQSK	44.7	3	54.9	1	50.2	2			32.7	1	54.9	7	37.9	2	38.8	3	54.7	1	38.2	1	54.6	1	54.7	8	50.4	2			54.6	1	37.5	1	54.6	4	54.9	19
		SKPETGEVIGVFESLQPSDTDLGAK	21.5	1									21.5	1			33.8	1							33.8	1	23.3	1							23.3	1	33.8	3
		VPFLFTVK					30	1					30	1			28.8	1							28.8	1	31.8	1					24.6	1	31.8	2	31.8	4
AT5G66760.1	SDH1-1 succinate dehydrogenase 1-1 chr5:26653776-26657224 FORWARD LENGTH=634	AFGGQSLDFGK					22.2	1					22.2	1																							22.2	1
		TEEGKIYQR													35.3	1									35.3	1					29.5	1			29.5	1	35.3	2
		VAEISKPGEK													27.2	1									27.2	1											27.2	1
AT5G67360.1	ARA12 Subtilase family protein chr5:26872192-26874465 REVERSE LENGTH=757	GYESTmGPIDESKESR							30.7	1			30.7	1	25.3	1									25.3	1											30.7	2
		TVTSVGGAGTYSVK							49.8	1			49.8	1																							49.8	1
ATCG00020.1	PSBA photosystem II reaction center protein A chrC:383-1444 REVERSE LENGTH=353	ANLGmEVmHER													57.8	5					25.6	1	34.8	2	57.8	8					38.1	2			38.1	2	57.8	10
		ETTENESANEGYR	66.8	2							31.9	1	66.8	3	80.4	1	81.9	1			80.9	1			81.9	3							49.7	1	49.7	1	81.9	7
		LIFQYASFNNSR													68.3	1							21.6	1	68.3	2	37.6	1							37.6	1	68.3	3
		VINTWADIINR	83.6	3			73.8	4			56.1	1	83.6	8	82	4	77.6	4	49.9	3	68.4	1	83.5	3	83.5	15	88.2	5	77.4	3	88.4	4	75.5	1	88.4	13	88.4	36
ATCG00120.1	ATPA ATP synthase subunit alpha chrC:9938-11461 REVERSE LENGTH=507	ADEISNIIR							38.8	1			38.8	1							68.3	1			68.3	1	33.4	1					56.5	1	56.5	2	68.3	4
		ASSVAQVVTSLQER																	32.5	1					32.5	1			71.9	1					71.9	1	71.9	2
		ATGKIAQIPVSEAYLGR							21.1	1			21.1	1									21.8	1	21.8	1					44.1	1	29.8	1	44.1	2	44.1	4
		ATQNQLAR			27.1	1							27.1	1																							27.1	1
		EAYPGDVFYLHSR	55.5	3	47.9	1	62.9	1					62.9	5	74.8	2			42	2	65.5	1	78.6	1	78.6	6	61.5	2	62.9	2	77.9	2			77.9	6	78.6	17
		EGIQEQLER													35.9	1									35.9	1											35.9	1
		ELIIGDRQTGK	53.5	1	47.4	2	72.9	1			34.4	1	72.9	5	45.4	3	47.1	2	59.8	4	50	1	55	1	59.8	11	50.2	2	59.4	4	50.1	3	45	1	59.4	10	72.9	26
		EVTIVNTGTVLQVGDGIAR					66.7	1					66.7	1	70.2	1			45.9	1					70.2	2											70.2	3
		FLLQEKV					32.2	1	31.2	2			32.2	3	29.5	3	29.1	3	26.8	2	30.3	1	28.5	1	30.3	10	33.3	2	25.2	2	32.2	1	33.8	2	33.8	7	33.8	20
		FLVQLR																			37.6	1			37.6	1	38.1	1	27.9	1	27.8	1			38.1	3	38.1	4
		GKISASESR	40.9	5	39.6	2							40.9	7	54.8	1			46.3	2	45.1	2			54.8	5	47.7	3					44.2	2	47.7	5	54.8	17
		GQRELIIGDR																					29.7	1	29.7	1					24.8	1			24.8	1	29.7	2
		GQRELIIGDRQTGK	32.9	2	29.5	1							32.9	3	25.2	1			24.6	1			19.6	1	25.2	3					18.7	1			18.7	1	32.9	7
		IAQIPVSEAYLGR	68.3	3	86	1	77.6	1	79.7	2	96.9	3	96.9	10	97.2	3	75.1	3	96.7	4	93.3	1	90.9	1	97.2	12	102	4	105	4	77.9	2	93.2	1	105	11	105	33
		IEQYNR			24.4	1							24.4	1					24.1	1					24.1	1	38.4	1							38.4	1	38.4	3
		ISASESR	36.2	6					23.9	1			36.2	7			34.6	1			39.5	1			39.5	2	39.3	3					38	1	39.3	4	39.5	13
		KFLVQLR					34.3	1					34.3	1			28.9	1	29.9	1			28.2	1	29.9	3	20.3	1			24	1			24	2	34.3	6
		LIESPAPGIISR	88.4	4	74.2	2	85.3	1	61.3	2	70.8	2	88.4	11	87.3	3	76.8	5	80.8	4	52.2	2	72.6	3	87.3	17	73	5	74.6	5	55.6	4	34.2	1	74.6	15	88.4	43
		LIESPAPGIISRR			23.9	1							23.9	1	25.7	1	29.1	1			22.5	1			29.1	3					31.5	1			31.5	1	31.5	5
		LRELLK															26.2	1							26.2	1											26.2	1
		RPPGREAYPGDVFYLHSR					42.9	2	46	1			46	3			41.9	2	29.8	1	35.2	1	50.9	2	50.9	6					40.5	2	44.8	2	44.8	4	50.9	13
		SVYEPLQTGLIAIDSmIPIGR																					82.1	1	82.1	1	47.5	1							47.5	1	82.1	2
		TLTAEAESFLK																													24.4	1	26.1	1	26.1	2	26.1	2
		TLTAEAESFLKEGIQEQLER					32.7	1					32.7	1									44.2	1	44.2	1	52.3	1							52.3	1	52.3	3
		TNKPQFQEIIASTK			35.2	1	63.5	1			65.8	1	65.8	3	73.5	2									73.5	2	36.2	1	50.9	1	38.6	1			50.9	3	73.5	8
		TYLKTNKPQFQEIIASTK					41.2	1					41.2	1									50.8	1	50.8	1											50.8	2
		VGSAAQIK	35.9	2									35.9	2	37.3	1	39.4	2							39.4	3	38.6	1			38.8	1	30.8	1	38.8	3	39.4	8
		VGSAAQIKAmKQVAGK					21.7	1					21.7	1									30.4	1	30.4	1											30.4	2
		VINALANPIDGR	36.1	1							39.5	2	39.5	3					55.2	1	72.4	2			72.4	3							73.9	3	73.9	3	73.9	9
		VINALANPIDGRGK	37.8	2	49.8	2					33.1	1	49.8	5	62.3	4	44.2	2	41.1	2			34	1	62.3	9	47.4	2	40	3	62.1	2	28.4	1	62.1	8	62.3	22
ATCG00130.1	ATPF ATPase, F0 complex, subunit B/B', bacterial/chloroplast chrC:11529-12798 REVERSE LENGTH=184	ILNTIR	40.4	1									40.4	1																							40.4	1
		NSEELREGAIQQLENAR													68.2	1									68.2	1											68.2	1
		NVETEADKFR	36.8	1									36.8	1																							36.8	1
		QLENYKNETILFEQQR	23.6	1									23.6	1																							23.6	1
		TINANIGmFGTmK	59.2	1									59.2	1																							59.2	1
		TINANIGmFGTmKEITD	43.6	1									43.6	1	30.4	1									30.4	1	27.7	1	33.2	1					33.2	2	43.6	4
		TINQVR	38.2	1									38.2	1																							38.2	1
ATCG00270.1	PSBD photosystem II reaction center protein D chrC:32711-33772 FORWARD LENGTH=353	AAEDPEFETFYTK	93.3	4			47.8	1			61.1	1	93.3	6	40.7	1	35.8	3	84.1	4	84.2	1	86.8	4	86.8	13	77.1	3	61.8	3	82.5	3	87.1	1	87.1	10	93.3	29
		AWMAAQDQPHENLIFPEEVLPR							68.3	2			68.3	2	59.3	2					28.5	2	39	1	59.3	5											68.3	7
		AYDFVSQEIR																			54.7	1			54.7	1					61.4	1	54	1	61.4	2	61.4	3
		NILLNEGIR	33.2	1									33.2	1	49.7	1	40	1							49.7	2	52.4	1			33.5	1	32.8	1	52.4	3	52.4	6
ATCG00280.1	PSBC photosystem II reaction center protein C chrC:33720-35141 FORWARD LENGTH=473	AAAAGFEK	40.7	1	30.2	1							40.7	2			41.8	3	49.2	3					49.2	6	49.2	2	46.2	1			31.3	1	49.2	4	49.2	12
		AAAAGFEKGIDRDFEPVLSmTPLN																													43.7	1			43.7	1	43.7	1
		DIQPWQER	30.6	1									30.6	1																							30.6	1
		GIDRDFEPVLSmTPLN	47	1			33	1					47	2									54.9	3	54.9	3					56.9	2	43	1	56.9	3	56.9	8
		LGANVGSAQGPTGLGK	67.2	2	40.3	3	56.8	1					67.2	6	87.7	3	65.4	1	70.2	3			65.9	2	87.7	9	72.8	3	32.4	2	72.9	2			72.9	7	87.7	22
		LKKDIQPWQER																					25.5	1	25.5	1			27.7	1					27.7	1	27.7	2
		SPTGEVIFGGETMR	26.3	1					65.1	1	69.1	1	69.1	3	73.9	5	33.9	1	52.7	1	73.6	1			73.9	8	44.3	1	42.1	2			89.4	1	89.4	4	89.4	15
ATCG00340.1	PSAB Photosystem I, PsaA/PsaB protein chrC:37375-39579 REVERSE LENGTH=734	FSQGLAQDPTTR	53.5	1									53.5	1	54.6	1							37.9	1	54.6	2	41	1			47.9	1	28.1	1	47.9	3	54.6	6
		TPLANLIR	37.3	1									37.3	1													38.8	1			45.7	1			45.7	2	45.7	3
ATCG00350.1	PSAA Photosystem I, PsaA/PsaB protein chrC:39605-41857 REVERSE LENGTH=750	ALSIIQGR																									31.2	1							31.2	1	31.2	1
		SPEPEVK	42.7	2	35.7	2					35.6	1	42.7	5	27.2	1			41.3	1					41.3	2	39.8	3	29.7	1	34.9	2			39.8	6	42.7	13
		VAPATQPR	21.6	1									21.6	1	32.5	1									32.5	1											32.5	2
ATCG00380.1	RPS4 chloroplast ribosomal protein S4 chrC:45223-45828 REVERSE LENGTH=201	DIITVKDEQNSR	33.8	1									33.8	1																	45.9	1			45.9	1	45.9	2
		RLGALPGLTSK																													30.2	1			30.2	1	30.2	1
ATCG00480.1	ATPB, PB ATP synthase subunit beta chrC:52660-54156 REVERSE LENGTH=498	AHGGVSVFGGVGER	40.4	1	37.6	1							40.4	2	64	1							66.5	1	66.5	2	70.3	1							70.3	1	70.3	5
		ATNLEMESK	47.3	2	51.3	2	39.1	1					51.3	5	41.8	2	54.9	3			39.5	2			54.9	7	55.2	3					37.8	1	55.2	4	55.2	16
		AVAmSATEGLK													37.6	1	35.3	1					24.6	1	37.6	3	54.8	1							54.8	1	54.8	4
		AVAmSATEGLKR	50.2	7	59.6	3	58	1					59.6	11	84.2	2	83.7	4	56	2					84.2	8	69.1	3	59.2	2	50.2	3	26.4	1	69.1	9	84.2	28
		EGNDLYMEMK	21.6	1									21.6	1			29.4	1							29.4	1											29.4	2
		EGNDLYmEmKESGVINEQNLAESK															54.6	1							54.6	1	32.2	1	25.5	1					32.2	2	54.6	3
		ESGVINEQNLAESK	76.9	1									76.9	1	77.3	2	67.5	3							77.3	5	76.8	1					44.2	1	76.8	2	77.3	8
		FVQAGSEVSALLGR	89.6	3	92.6	1							92.6	4	90.9	1	103	3	91	1			84.5	1	103	6	83.3	1	106	1	30	1	53.5	2	106	5	106	15
		GGKIGLFGGAGVGK	48.2	1	45	1	35.1	1					48.2	3	71.9	1	23.9	1	41.5	2					71.9	4	55.4	2							55.4	2	71.9	9
		GIYPAVDPLDSTSTMLQPR	67.9	3	49.8	2	90.4	3					90.4	8	92.7	4	102	6	86.9	6			45.8	2	102	18	110	3	100	6	95.4	2	82.8	3	110	14	110	40
		GmDVVDmGNPLSVPVGGATLGR	107	3	75.8	1	60.4	1					107	5	76.1	2	104	5	78.2	1			65.4	3	104	11	84.1	5	101	1	68.7	1	54.3	2	101	9	107	25
		IAQIIGPVLDVAFPPGKmPNIYNALVVK	52.3	1									52.3	1																							52.3	1
		IFNVLGEPVDNLGPVDTR	70	2	66.6	1	124	2					124	5	105	4	106	3	115	3			87	4	115	14	104	5	84.6	2			79.2	3	104	10	124	29
		IGLFGGAGVGK	45.7	1	47.3	1	50	1	49.1	1			50	4	34.1	1	48.4	2	48.8	2	37.7	1			48.8	6	48.7	4	42.4	1	50.3	1	56.2	2	56.2	8	56.2	18
		IVGEEHYETAQQVK	68.7	5	66.5	3	63.3	2					68.7	10	84.2	4	69.9	7	56.5	1	41.7	1			84.2	13	76.3	4	92.7	2	39.3	1			92.7	7	92.7	30
		IVGEEHYETAQQVKQTLQR			20.3	1							20.3	1			43.5	1							43.5	1					30	1			30	1	43.5	3
		mPNIYNALVVK			29.4	1	34.2	1					34.2	2			62.5	1							62.5	1	48.9	2	36.2	1					48.9	3	62.5	6
		mPSAVGYQPTLSTEmGTLQER	52.5	2			35.9	1					52.5	3	88.9	1	101	4	75.3	1			59.7	2	101	8	73.5	1			43.6	2			73.5	3	101	14
		SAPAFIELDTK	72.1	1			41.8	1					72.1	2			32	1	48.6	1					48.6	2	52.9	1	39.4	1	31.1	1			52.9	3	72.1	7
		TNPTTSNPEVSIR	74.1	1	41.8	1							74.1	2	63.5	3	37.9	1	67.9	1					67.9	5	62.7	1	53.7	1	54.8	1			62.7	3	74.1	10
		TNPTTSNPEVSIREK															47.8	1							47.8	1											47.8	1
		TREGNDLYmEmKESGVINEQNLAESK					34.4	1					34.4	1			50.1	2							50.1	2											50.1	3
		TVLImELINNIAK	53.3	2									53.3	2	79.6	1	87.1	2	22.4	1			96.8	1	96.8	5	64.6	3	49.1	1					64.6	4	96.8	11
		VALVYGQmNEPPGAR	109	3	80.2	2			26.7	1			109	6	112	6	79.5	4	46.7	1	95.6	3	97.4	1	112	15	103	4	99.8	2	106	1	56.6	3	106	10	112	31
		VVDLLAPYR																	39.2	1					39.2	1	39.5	2	33.6	1					39.5	3	39.5	4
		VVDLLAPYRR															29.8	2	31.1	2			23.8	1	31.1	5	30.2	2							30.2	2	31.1	7
ATCG00490.1	RBCL ribulose-bisphosphate carboxylases chrC:54958-56397 FORWARD LENGTH=479	AGVKEYK							43	1			43	1	46.6	1			46.9	1	48.5	1			48.5	3	24.4	2					45.2	1	45.2	3	48.5	7
		AGVKEYKLTYYTPEYETK			33.5	1	43.5	1					43.5	2			43.2	1					55.3	1	55.3	2	31.7	1							31.7	1	55.3	5
		ALAALR																									25.4	1							25.4	1	25.4	1
		ALAALRLEDLR	35.5	3	45.2	1	46.3	1	31	1			46.3	6	30.6	2	45.1	4	46.4	3	27	1	45	2	46.4	12	42.2	3	31.1	2	34.7	2	32	1	42.2	8	46.4	26
		ALAALRLEDLRIPPAYTK																									25.2	1							25.2	1	25.2	1
		ALRLSGGDHIHAGTVVGK					39.9	1					39.9	1									32.5	1	32.5	1											39.9	2
		AmHAVIDR	51.1	12	42.7	8	31.6	2	27.7	1	47	7	51.1	30	43.6	7	56.4	12	51.8	4	32	1	50.3	3	56.4	27	46.6	4	39.8	4	44.3	2	38.3	1	46.6	11	56.4	68
		AmHAVIDRQK	43.4	9	45.2	6	26.6	1	20.6	1	23.3	1	45.2	18	40.6	6	44.2	8	51.2	5	33.7	1	30.7	2	51.2	22	53.1	7	39.5	2	42.2	3	31.9	1	53.1	13	53.1	53
		ASVGFK	45.6	1	39.8	3							45.6	4			41.3	1	43.4	1	34	1	36.1	1	43.4	4	43.7	2	39.7	2			33.8	1	43.7	5	45.6	13
		AVYEcLR	49.6	4	49.4	4	37.6	1	40.5	1	40.6	1	49.6	11	48.1	2	45.2	4	41.1	4	35.8	1	37	2	48.1	13	49.6	4	45.4	1	42.6	1	42	1	49.6	7	49.6	31
		DDENVNSQPFmR	37.8	1									37.8	1																							37.8	1
		DDYVEKDR	20.1	1			44.9	2					44.9	3			39.8	2							39.8	2	23.6	1	30.1	1	44	2			44	4	44.9	9
		DDYVEKDRSR					24.2	1					24.2	1													26.5	1							26.5	1	26.5	2
		DKLNKYGRPLLGcTIKPK															29.8	2							29.8	2											29.8	2
		DLAVEGNEIIR	38.8	4	37.7	2	69.4	1	61.8	1	27.3	3	69.4	11	49	3	86.9	3	21.7	1			76.3	1	86.9	8	87.1	3	31.3	1	74.5	1			87.1	5	87.1	24
		DLAVEGNEIIREAcK					64.8	1					64.8	1			84	1	30.9	1			87.7	1	87.7	3	50.3	1			62	1			62	2	87.7	6
		DNGLLLHIHR	54.5	2	63.4	1	63.4	2			37.7	1	63.4	6	30.8	1	68.2	5	63.3	2			47.3	1	68.2	9	63.4	3	66.4	1	57	1			66.4	5	68.2	20
		DTDILAAFR	66.6	6	60.8	4	67.8	3	72.7	4	54.2	3	72.7	20	72.2	3	76.9	7	69.4	5	73.1	3	42.6	2	76.9	20	69.9	6	65.4	5	69.3	2	67.6	3	69.9	16	76.9	56
		EITFNFPTIDKLDGQE	31.5	1	26.2	1							31.5	2			83.3	2	22.1	1					83.3	3	76.1	2							76.1	2	83.3	7
		ESTLGFVDLLR															55.5	1							55.5	1											55.5	1
		ESTLGFVDLLRDDYVEKDR					33	1					33	1													29	2							29	2	33	3
		EYKLTYYTPEYETK															23.5	1							23.5	1											23.5	1
		EYKLTYYTPEYETKDTDILAAFR																					39.5	1	39.5	1											39.5	1
		FLFcAEAIYK					40.2	1					40.2	1			23.2	1							23.2	1											40.2	2
		GGLDFTKDDENVNSQPFmR	52.5	3	67.7	4	61.9	3	31.3	1	47.6	2	67.7	13	84.8	4	80.4	7	102	2	43.5	1	75	3	102	17	64.1	5	63.3	4	32.9	2	65.1	2	65.1	13	102	43
		GHYLNATAGTcEEMIKR					28.4	1					28.4	1	31.1	1	23.9	1					22.7	1	31.1	3											31.1	4
		IPPAYTK	33	1			25	1					33	2			35	1							35	1	32.5	2			26.6	2			32.5	4	35	7
		LEDLRIPPAYTK	36.1	1	27.5	2	51.4	2					51.4	5	32.3	1	21.2	1	28.5	2			47.8	1	47.8	5	29.9	4	58.4	1	32	1			58.4	6	58.4	16
		LEGDRESTLGFVDLLR															50.1	3							50.1	3											50.1	3
		LGLSAKNYGR			69.2	1	38.6	1					69.2	2	51.2	1	27.8	2							51.2	3	22.6	1			63.6	2			63.6	3	69.2	8
		LSGGDHIHAGTVVGK	61	5	83	2	43.1	3			19.9	1	83	11	66.9	4	70.4	2	70.5	2			38.1	1	70.5	9	84.3	5	43.2	1	40.5	2			84.3	8	84.3	28
		LSGGDHIHAGTVVGKLEGDR					36.6	1					36.6	1																							36.6	1
		LTYYTPEYETK	53.4	5	52.3	2	38.3	1			51	2	53.4	10	50	5	48.1	2	43.9	1	56.1	1	35.9	1	56.1	10	55.4	3	45	1	34.5	1	48	1	55.4	6	56.1	26
		LTYYTPEYETKDTDILAAFR	40.3	2	33.2	1	54.1	2					54.1	5	46.7	3	110	4	29.5	2			45.6	2	110	11	60.8	6	36.5	1	29.6	1	39.7	1	60.8	9	110	25
		NEGRDLAVEGNEIIR	57.3	4	67.9	4	66.1	4	24.6	3	50	2	67.9	17	62.5	4	72.9	5	54.5	4			71.9	3	72.9	16	66.1	7	62	2	57.8	4	32.8	2	66.1	15	72.9	48
		NEGRDLAVEGNEIIREAcK					35.9	1					35.9	1			50.6	1					59.8	3	59.8	4											59.8	5
		NHGMHFR	31.1	4	31.2	5	23.2	1					31.2	10	25.4	3	28.2	3	31	2			35.2	1	35.2	9	25	2	26	1					26	3	35.2	22
		RAVFAR	34	1	38.8	2	26.1	1					38.8	4	29.5	1	35.8	1	32.6	1			33.9	1	35.8	4	25.6	1			26.9	1			26.9	2	38.8	10
		SQAETGEIK					33	1			28.3	1	33	2			51.8	1							51.8	1											51.8	3
		SQAETGEIKGHYLNATAGTcEEmIKR					31.3	2					31.3	2			44.9	3					64.4	1	64.4	4											64.4	6
		TFQGPPHGIQVER	80.2	8	72.6	7	74.4	5	60.8	3	67.3	6	80.2	29	73.8	7	68	6	83.6	6	53.5	3	61.8	3	83.6	25	66.4	7	69.2	6	67.4	4	54.8	2	69.2	19	83.6	73
		TFQGPPHGIQVERDK	20.6	1			35.2	1			24.8	1	35.2	3	29.9	1	27.2	2							29.9	3	30.2	1			18.6	1			30.2	2	35.2	8
		TFQGPPHGIQVERDKLNK	29.9	2	22.7	1							29.9	3	30.9	1			43.2	1					43.2	2	30.6	1	37.6	1	28.8	2			37.6	4	43.2	9
		VALEAcVQAR	83.4	80	77.8	29	82.1	43	81.7	3	76.5	6	83.4	161	74.6	12	89.5	51	78	40	82	2	83.8	17	89.5	122	82.9	73	73.4	8	77.2	19	76.5	3	82.9	103	89.5	386
		VLAKALR					23.2	1					23.2	1																							23.2	1
		WSPELAAAcEVWK															43.3	1							43.3	1	57.7	1							57.7	1	57.7	2
		YGRPLLGcTIKPK	31.2	2	23.9	1	48.4	1	36.4	1			48.4	5			51.5	1	30.2	1	45.4	1	42.8	2	51.5	5	37.1	1			47	3	37.3	1	47	5	51.5	15
ATCG00540.1	PETA photosynthetic electron transfer A chrC:61657-62619 FORWARD LENGTH=320	EVIDIIPR																															25.7	1	25.7	1	25.7	1
		GRGQIYPDGSK																					39.2	1	39.2	1											39.2	1
		IGNLSFQNYRPNKK	27.9	2			37.1	1					37.1	3									24.6	1	24.6	1					26.5	1			26.5	1	37.1	5
		NILVIGPVPGQK	53.7	1	33.8	1	55.8	2					55.8	4	35.5	1	46.4	2			36.5	1	47.3	2	47.3	6	61.9	2	27.4	1	39.4	2	42.5	1	61.9	6	61.9	16
		SNNTVYNATAGGIISK	44.9	3			74.1	1					74.1	4																	48.2	1			48.2	1	74.1	5
		YPIYVGGNR	40.8	1									40.8	1							40.8	1			40.8	1											40.8	2
ATCG00680.1	PSBB photosystem II reaction center protein B chrC:72371-73897 FORWARD LENGTH=508	AGSmDNGDGIAVGWLGHPVFR	21.4	1			44.6	1					44.6	2									71.7	1	71.7	1					81.5	2			81.5	2	81.5	5
		AQLGEIFELDR	70.6	2					46.3	1			70.6	3	44.7	3			49.1	1			50	1	50	5	53	2	31.7	1	37.6	1	45.6	1	53	5	70.6	13
		AQLGEIFELDRATLK	44.3	1									44.3	1																							44.3	1
		ATLKSDGVFR																					35.2	1	35.2	1											35.2	1
		LAFYDYIGNNPAK	32.2	1					39.3	1			39.3	2	62.2	3					73.2	1	66.6	3	73.2	7	39.5	1			57.6	2	76.9	1	76.9	4	76.9	13
		LGDPTTK	24.3	3									24.3	3			31.7	1							31.7	1	36.7	2							36.7	2	36.7	6
		LGDPTTKR	53.3	2									53.3	2			59.3	1	53.3	1	33	1			59.3	3	46.9	1	40	1					46.9	2	59.3	7
		RAQLGEIFELDR																					29.3	1	29.3	1											29.3	1
		RAQLGEIFELDRATLK																													24.1	1			24.1	1	24.1	1
		RmPTFFETFPVVLVDGDGIVR	53.7	2									53.7	2									29.2	1	29.2	1											53.7	3
		VSAGLAENQSLSEAWAK													68.8	2									68.8	2											68.8	2
ATCG00710.1	PSBH photosystem II reaction center protein H chrC:74485-74706 FORWARD LENGTH=73	ATQTVEDSSR	37.7	2									37.7	2																							37.7	2
		LLKPLNSEYGK	36	2									36	2							22.4	1			22.4	1											36	3
ATCG00730.1	PETD photosynthetic electron transfer D chrC:76481-77672 FORWARD LENGTH=160	GVTKKPDLNDPVLR	61.8	2									61.8	2																							61.8	2
		KPDLNDPVLR	29.4	1									29.4	1																							29.4	1
ATCG00770.1	RPS8 ribosomal protein S8 chrC:80068-80472 REVERSE LENGTH=134	GKDTIADIITSIR															26.7	1							26.7	1											26.7	1
		IGSTNITESIVK	29.9	1					35.8	1			35.8	2	57.8	1	42.1	1			41.4	1			57.8	3											57.8	5
ATCG00800.1	structural constituent of ribosome chrC:82826-83482 REVERSE LENGTH=218	AIELTEQANTK	38.6	1			39.2	1					39.2	2							41	1	75.8	1	75.8	2					46.8	1			46.8	1	75.8	5
		LGTTQSHHSLWFAQPK																			20	1			20	1											20	1
		RVEELQmNVQK																					31.4	1	31.4	1					27.5	1			27.5	1	31.4	2
ATCG01060.1	PSAC iron-sulfur cluster binding;electron carriers;4 iron, 4 sulfur cluster binding chrC:117318-117563 REVERSE LENGTH=81	AKQIASAPR	47.4	2									47.4	2															22.5	1					22.5	1	47.4	3
		TEDcVGcKR	24.5	1									24.5	1																							24.5	1
cont10	gi 136429 sp P00761 TRYP PIG TRYPSIN PRECURSOR.	IITHPNFNGNTLDNDImLIK	44.5	3	50.5	2	46.7	5	22.5	1	53.7	7	53.7	18	50	6	33.4	1					51.1	9	51.1	16	54.8	4	28.6	1	61.9	8	45.8	1	61.9	14	61.9	48
		IITHPNFNGNTLDNDImLIKLSSPATLNSR									30.3	1	30.3	1	44.7	1									44.7	1											44.7	2
		LGEHNIDVLEGNEQFINAAK	124	10	120	8	119	12	67.3	5	124	10	124	45	122	9	113	11	131	11	74.5	6	138	14	138	51	111	12	110	7	109	13	113	10	113	42	138	138
		LSSPATLNSR	63.8	7	69.5	6	65.5	5	65.6	5	65.6	3	69.5	26	66.6	4	64	5	64.2	5	65.7	5	65.5	5	66.6	24	67.1	5	65.4	5	62.4	5	67.1	6	67.1	21	69.5	71
		ScAAAGTEcLISGWGNTK	81.4	2	84.7	5					135	2	135	9	138	5	134	2	121	6					138	13	88.2	4	74.8	3					88.2	7	138	29
		SRIQVR	25.1	1									25.1	1																							25.1	1
		SSGSSYPSLLQcLK									51	2	51	2	36.5	1	37	1							37	2											51	4
		VATVSLPR	54	41	54.2	39	55.9	5	56.6	11	41.2	23	56.6	119	53.4	27	53.7	53	54.3	42	60.6	11	56.6	4	60.6	137	54.3	62	54.3	37	54.9	6	57.1	8	57.1	113	60.6	369
cont121,cont92	gi 547749 sp P13645 K1CJ HUMAN KERATIN TYPE I CYTOSKELETAL 10 (CYTOKERATIN 10) (K10) (CK 10)	ALEESNYELEGK	82.3	2	82.3	1	65.6	1	103	6	86.8	4	103	14	86.7	3	72.3	1	60.5	1	84.3	5			86.7	10	49.4	2	87	1			88.9	5	88.9	8	103	32
		DAEAWFNEK	51.6	1	48.2	1	48.4	1	64.4	2			64.4	5			52.9	1	58.2	1	34.9	1			58.2	3			27.1	2			61.7	2	61.7	4	64.4	12
		DAEAWFNEKSK																											34.6	1					34.6	1	34.6	1
		GSLGGGFSSGGFSGGSFSR	113	2	63.3	1			100	5	160	8	160	16	130	5							29.8	1	130	6					61.1	1	121	2	121	3	160	25
		HGNSHQGEPRDYSK																											21.1	1					21.1	1	21.1	1
		IKEWYEK							29.5	3			29.5	3															35.1	1					35.1	1	35.1	4
		IRLENEIQTYR					55	1	38.3	3			55	4															56.1	1			19.6	1	56.1	2	56.1	6
		KDAEAWFNEK																											73.5	1					73.5	1	73.5	1
		KNHEEEmKDLR																											25.1	2					25.1	2	25.1	2
		LAADDFR	46.7	4	42.6	4	41.4	1	45.6	4	47.2	1	47.2	14	40.6	2	44	3	38.4	5	38.5	1	30.7	1	44	12	49.5	3	50.1	3	35.2	1	46.3	4	50.1	11	50.1	37
		LASYLDK							31.7	1			31.7	1																							31.7	1
		LASYLDKVR	47.1	2			50.5	2	66.8	7	58.8	5	66.8	16	20.1	1	52.4	1			32.2	2			52.4	4			67.7	2	59.1	2	37.2	3	67.7	7	67.7	27
		LENEIQTYR	26.9	1					59.9	4	47.3	3	59.9	8			24.4	1			48	2			48	3	50.9	1	63.3	1	41.8	1	53.3	4	63.3	7	63.3	18
		LKYENEVALR	31.6	1	38.9	2	34.8	1	52.3	4	64.3	4	64.3	12	42.6	3	25.9	2	18	1					42.6	6			67.8	2	46	1	44.3	3	67.8	6	67.8	24
		NHEEEmKDLR							24.5	2	32.2	2	32.2	4															28.8	1					28.8	1	32.2	5
		NVQALEIELQSQLALK	22.3	1									22.3	1																							22.3	1
		NVSTGDVNVEmNAAPGVDLTQLLNNmR							28	1	39.9	1	39.9	2															24	1	44.1	2	43.9	2	44.1	5	44.1	7
		QSLEASLAETEGR																											32.6	1					32.6	1	32.6	1
		QSVEADINGLRR																											37.4	2	27.5	1			37.4	3	37.4	3
		SEITELR									26.7	1	26.7	1																							26.7	1
		SEITELRR																											33	1					33	1	33	1
		SGGGGGGGGcGGGGGVSSLR					84.7	1	100	2	128	1	128	4	104	1									104	1					105	1			105	1	128	6
		SLLEGEGSSGGGGR	73.6	2	62.1	1	40.6	1	92.8	4	90.1	4	92.8	12	59.3	4	45.3	1			80.5	3	61.8	1	80.5	9			78.2	1	76.6	1	77	5	78.2	7	92.8	28
		SQYEQLAEQNR	76.1	2			49.9	1	71.9	3	62	5	76.1	11					34.3	1					34.3	1	55.2	1	73.5	1	44.9	2	39.2	1	73.5	5	76.1	17
		SQYEQLAEQNRK	45	2			28.4	2	66.4	5	58.8	8	66.4	17	52.7	5	29.7	1			27.3	2			52.7	8			55.4	2	57.5	2	38.9	2	57.5	6	66.4	31
		SQYEQLAEQNRKDAEAWFNEK																															38.3	1	38.3	1	38.3	1
		VLDELTLTK			51.5	1	42.8	1	40.4	1	39.7	1	51.5	4					29.1	1					29.1	1			63.1	1			48.9	1	63.1	2	63.1	7
		VTmQNLNDR	37.7	1	48.2	1	51.6	1	65.7	10	64.2	5	65.7	18	62.5	3					61.4	6			62.5	9			65.9	3	59.4	2	58.1	6	65.9	11	65.9	38
		YENEVALR							53.7	1	45	2	53.7	3	45.1	1									45.1	1			48.7	1					48.7	1	53.7	5
cont129	gi 1346344 sp P02538 K2CA HUMAN KERATIN TYPE II CYTOSKELETAL 6A (CYTOKERATIN 6A) (CK 6A) (K6A KERATIN) gi 2119221 pir A57398 keratin type II - human gi 908779 (L42583) keratin type II [Homo sapiens]	ADTLTDEINFLR							31.4	1	70.9	1	70.9	2																			68.3	4	68.3	4	70.9	6
		AIGGGLSSVGGGSSTIK																															67.4	1	67.4	1	67.4	1
		ALYDAELSQmQTHISDTSVVLSmDNNR							56.8	1			56.8	1							57.7	1			57.7	1											57.7	2
		AQYEEIAQR	49.3	1	49.9	1			64.2	4	59.6	3	64.2	9	58.4	2	53.6	2	36.1	1	54.6	4			58.4	9			32.3	1			53.8	5	53.8	6	64.2	24
		FASFIDKVR							27.7	3	31.5	1	31.5	4							27.1	1			27.1	1			58.3	2			29	2	58.3	4	58.3	9
		FLEQQNK									27.8	1	27.8	1																							27.8	1
		GSGGLGGAcGGAGFGSR													32.4	1									32.4	1							33.5	1	33.5	1	33.5	2
		ISIGGGScAISGGYGSR							50.1	1	76.9	2	76.9	3	82.6	1									82.6	1							84.2	4	84.2	4	84.2	8
		LLEGEEcR							40.9	2			40.9	2																			28.5	1	28.5	1	40.9	3
		NKYEDEINKR							44	3	33.3	1	44	4							28.1	1			28.1	1			44.6	1			31.5	1	44.6	2	44.6	7
		NLDLDSIIAEVK							38.2	2	65.5	1	65.5	3															88.7	1	45.8	1	44.2	1	88.7	3	88.7	6
		QLDSIVGER									29.3	1	29.3	1																							29.3	1
		RGFSANSAR									33.5	2	33.5	2																							33.5	2
		SGFSSVSVSR							47.2	2	89.3	3	89.3	5	70.8	1									70.8	1			27.7	1			58.6	2	58.6	3	89.3	9
		SLYGLGGSKR	35	1	36.8	2					38.9	2	38.9	5	38	1	38.5	1	22.9	1					38.5	3			27.3	1			30.2	1	30.2	2	38.9	10
		SRGSGGLGGAcGGAGFGSR									37.5	1	37.5	1	35.1	1									35.1	1							43.8	1	43.8	1	43.8	3
		TAAENEFVTLKK									43.2	1	43.2	1																			20.5	1	20.5	1	43.2	2
		TLNNKFASFIDKVR							70.3	2			70.3	2															53.5	1					53.5	1	70.3	3
		WTLLQEQGTK	42.5	1							25.7	1	42.5	2																							42.5	2
		YEDEINKR									19.9	1	19.9	1																							19.9	1
		YEELQVTAGR	44	1									44	1																							44	1
cont156	gi 1363944 pir JC4313 type I keratin 16 - human gi 1195531 bbs 172338 (S79867) type I keratin 16 K16 [human epidermal keratinocytes Peptide 473 aa] [Homo sapiens]	ALEEANADLEVK							55.7	3	55.2	3	55.7	6							30.4	1			30.4	1							56.5	3	56.5	3	56.5	10
		APSTYGGGLSVSSR							57.5	1	62.3	1	62.3	2	57.6	1									57.6	1							72.5	2	72.5	2	72.5	5
		ASLENSLEETKGR																			20.8	1			20.8	1											20.8	1
		DAETWFLSK	25.5	1									25.5	1																			54.9	2	54.9	2	54.9	3
		EVFTSSSSSSSR																															42.9	1	42.9	1	42.9	1
		GScGIGGGIGGGSSR	49.2	1							75.5	1	75.5	2	67.9	1									67.9	1							45.5	2	45.5	2	75.5	5
		ISSVLAGGScR							58.6	3	33.7	1	58.6	4	28.6	1					34.1	2			34.1	3							64	3	64	3	64	10
		LAADDFR	46.7	4	42.6	4			45.6	4	47.2	1	47.2	13	40.6	2	44	3	38.4	5	38.5	1			44	11			50.1	3	35.2	1	46.3	4	50.1	8	50.1	32
		LASYLDK							31.7	1			31.7	1																							31.7	1
		LASYLDKVR	47.1	2					66.8	7	58.8	5	66.8	14	20.1	1	52.4	1			32.2	2			52.4	4			67.7	2	59.1	2	37.2	3	67.7	7	67.7	25
		TEELNKEVASNSELVQSSR	38.1	1									38.1	1																			36.8	1	36.8	1	38.1	2
		TRLEQEIATYRR																															22.2	1	22.2	1	22.2	1
		VLDELTLAR	32.1	1	60.5	1			65	3			65	5					47.9	1					47.9	1							67.2	4	67.2	4	67.2	10
		VTmQNLNDR	37.7	1	48.2	1			65.7	10	64.2	5	65.7	17	62.5	3					61.4	6			62.5	9			65.9	3	59.4	2	58.1	6	65.9	11	65.9	37
cont64,cont72	gi 254622 bbs 112352 (S43646) cytokeratin 2 CK 2 [human epidermis Peptide 645 aa] [Homo sapiens]	AAFGGSGGR							41.7	2	28.7	1	41.7	3							38.5	1			38.5	1			35	1					35	1	41.7	5
		AAFGGSGGRGSSSGGGYSSGSSSYGSGGR																													62.5	1			62.5	1	62.5	1
		AQEREQIK							28.1	2			28.1	2																							28.1	2
		AQEREQIKTLNNK							26	1			26	1															31.9	1					31.9	1	31.9	2
		AQYEEIAQR	49.3	1	49.9	1			64.2	4	59.6	3	64.2	9	58.4	2	53.6	2	36.1	1	54.6	4			58.4	9	55.2	2	32.3	1			53.8	5	55.2	8	64.2	26
		DVDNAYmIK					33.4	2					33.4	2																							33.4	2
		FASFIDKVR					22.8	1	27.7	3	31.5	1	31.5	5							27.1	1			27.1	1			58.3	2			29	2	58.3	4	58.3	10
		FLEQQNQVLQTK	79.8	2	76.4	1	58.1	4	95.9	5	91.7	3	95.9	15	73.7	2					94.9	5			94.9	7	38.7	1	79.1	1	39.1	1	97.6	6	97.6	9	97.6	31
		GFSSGSAVVSGGSR					71.9	1	105	3	86.3	2	105	6	88.9	1									88.9	1							82.8	1	82.8	1	105	8
		GGSGGGGSISGGGYGSGGGSGGR									102	2	102	2			37.1	1							37.1	1	34.4	1							34.4	1	102	4
		GGSISGGGYGSGGGK					36.9	1	102	3	54.2	1	102	5	58.2	3									58.2	3			71.4	1			38.2	1	71.4	2	102	10
		GGSSSGGGYGSGGGGSSSVK	50.2	1					78	2			78	3																							78	3
		GSSSGGGYSSGSSSYGSGGR	52.1	1					90.4	4	81.3	1	90.4	6	64.3	1					79.8	1			79.8	2			105	1	72.2	1	125	5	125	7	125	15
		HGGGGGGFGGGGFGSR	35.1	2	85.3	4	28.7	1	53.1	4	93.6	4	93.6	15	94.8	3	37.8	1			26.7	1	38.1	1	94.8	6	41.8	1	49.8	1	87.4	2	47.8	2	87.4	6	94.8	27
		IEISELNR	21.7	1					53.8	4	52.3	3	53.8	8	28.4	1					40.2	2			40.2	3							40.4	3	40.4	3	53.8	14
		KYEDEINKR	59.6	2	60.9	3	45.7	2	56.7	6	66	4	66	17	45.7	2	30.4	1	49.9	3			24	2	49.9	8			59.2	3	33.3	1	35.6	2	59.2	6	66	31
		LLEGEEcR							40.9	2			40.9	2																			28.5	1	28.5	1	40.9	3
		LLRDYQELMNVK							28.2	2			28.2	2															35.5	1					35.5	1	35.5	3
		LQGEIAHVK							45.6	2	35.5	1	45.6	3																							45.6	3
		NLDLDSIIAEVK					28.6	1	38.2	2	65.5	1	65.5	4															88.7	1	45.8	1	44.2	1	88.7	3	88.7	7
		RSTSSFScLSR							29.9	1	38.7	1	38.7	2																							38.7	2
		SISISVAGGGGGFGAAGGFGGR	57.8	2									57.8	2																							57.8	2
		SKEEAEALYHSK							48.5	2			48.5	2															50	1					50	1	50	3
		SLVGLGGTK							39.1	2			39.1	2							26.5	1			26.5	1							28.1	1	28.1	1	39.1	4
		STSSFScLSR			29	1			53.4	3	38.3	2	53.4	6	25.9	2					34.7	1			34.7	3			54	1			42.1	3	54	4	54	13
		TAAENDFVTLK							59.4	3	45.3	3	59.4	6	37	1									37	1			67.9	1			25.5	1	67.9	2	67.9	9
		TAAENDFVTLKK			25.8	1			65.5	6	64.4	5	65.5	12	21.6	1									21.6	1			45.7	1			54.7	1	54.7	2	65.5	15
		TLNNKFASFIDKVR							70.3	2			70.3	2															53.5	1					53.5	1	70.3	3
		TSQNSELNNMQDLVEDYKK							40.3	3	46.7	3	46.7	6															62.6	1			36.6	3	62.6	4	62.6	10
		VDLLNQEIEFLK							44	3			44	3															65.5	1					65.5	1	65.5	4
		YEDEINKR									19.9	1	19.9	1																							19.9	1
		YEELQVTVGR					72	1					72	1															67.3	2					67.3	2	72	3
		YGSGGGSKGGSISGGGYGSGGGK							27.4	1	23.9	1	27.4	2															80	1	29.4	1			80	2	80	4
		YLDGLTAER	61.3	2	61.3	2	51.1	2	77.5	4	69.8	4	77.5	14	58.1	3	56.2	2	35.5	3			34.3	2	58.1	10	66.5	2	67.8	4	69.5	2	64.8	2	69.5	10	77.5	34
cont68	gi 1082558 pir S41161 keratin 9 cytoskeletal - human gi 435476 (Z29074) cytokeratin 9 [Homo sapiens]	EIETYHNLLEGGQEDFESSGAGK							43.3	1			43.3	1																			55.2	1	55.2	1	55.2	2
		EVTQLR							26.5	1			26.5	1			32.5	1							32.5	1	32.5	1					23.6	1	32.5	2	32.5	4
		FSSSSGYGGGSSR	83.7	3	80.7	2	77.2	3	102	5	79.2	4	102	17	95.1	4	67.1	2			97	4	64.3	2	97	12	57.7	1	24.1	1			91.1	5	91.1	7	102	36
		GGSGGSYGGGGSGGGYGGGSGSR	107	5	70.2	3	142	3	129	5	144	3	144	19	128	2	108	4	82.2	3	117	4	119	3	128	16	101	3	135	3	132	2	131	4	135	12	144	47
		GPAAIQK							47.2	2	30.6	1	47.2	3													23.9	1	30.6	1					30.6	2	47.2	5
		GSRGGSGGSYGGGGSGGGYGGGSGSR	91.4	2	83.4	4	26.3	1					91.4	7			98.2	4	75	3	58	1			98.2	8	59.9	2	71.8	2			36.1	1	71.8	5	98.2	20
		HGVQELEIELQSQLSK	25.9	1									25.9	1																							25.9	1
		HGVQELEIELQSQLSKK	37.5	1									37.5	1																							37.5	1
		IGLGGRGGSGGSYGR	28.6	3	43.5	5	36.8	1	27.6	1	25.5	1	43.5	11	33	1	45.2	3			26.7	1	43.3	1	45.2	6			27.6	2			19.8	1	27.6	3	45.2	20
		IKFEmEQNLR	40.7	2	34.6	1	30.7	1	42.4	6	54.2	4	54.2	14	20.1	1					41.7	2			41.7	3	26	1					28.5	3	28.5	4	54.2	21
		LASYLDK							31.7	1			31.7	1																							31.7	1
		MTLDDFR	40.9	1					38.1	2	25.2	2	40.9	5					26.8	1	35	1			35	2	29.4	2	37.4	1					37.4	3	40.9	10
		NHKEEmSQLTGQNSGDVNVEINVAPGKDLTK	25	3							29.5	4	29.5	7	39.5	1									39.5	1											39.5	8
		QFSSSYLSR	34.2	1									34.2	1																							34.2	1
		QGVDADINGLR	52.7	1									52.7	1			56.9	1							56.9	1			39.7	1					39.7	1	56.9	3
		SGGGGGGGLGSGGSIR	134	3	122	5	123	3	130	5	122	4	134	20	105	3	129	5	100	5	120	3	121	2	129	18	135	2	127	4	73.7	3	116	2	135	11	135	49
		SLEDTKNR							33.3	1			33.3	1																							33.3	1
		STMQELNSR	58.4	1	77.6	1	68.7	4	71.8	6	57.2	7	77.6	19	62.2	6	51.3	1			64.2	2	61.9	3	64.2	12					54.5	5	68.7	3	68.7	8	77.6	39
		TLLDIDNTR	39.7	3	41.3	1	30	2	59	1	61.3	3	61.3	10	44.3	1	32.2	1	25.3	1			23.2	1	44.3	4	38.9	1	48.5	1					48.5	2	61.3	16
		TLNDmRQEYEQLIAK			25.7	2	38.1	3	40.7	3	63.8	3	63.8	11					28.5	1					28.5	1			50.2	2			38.9	6	50.2	8	63.8	20
cont79	gi 125105 sp P13647 K2C5 HUMAN KERATIN TYPE II CYTOSKELETAL 5 (CYTOKERATIN 5) (K5) (CK 5) (58 KD CYTOKERATIN) gi 88051 pir A29904 keratin K5 58K type II epidermal (version 1) - human gi 307082 (M21389) keratin type II [Homo sapiens]	AQYEEIANR									46.9	2	46.9	2																			45	1	45	1	46.9	3
		FASFIDKVR					22.8	1	27.7	3	31.5	1	31.5	5							27.1	1			27.1	1			58.3	2			29	2	58.3	4	58.3	10
		FLEQQNK									27.8	1	27.8	1																							27.8	1
		LLEGEEcR							40.9	2			40.9	2																			28.5	1	28.5	1	40.9	3
		NKYEDEINKR							44	3	33.3	1	44	4							28.1	1			28.1	1			44.6	1			31.5	1	44.6	2	44.6	7
		NLDLDSIIAEVK					28.6	1	38.2	2	65.5	1	65.5	4															88.7	1			44.2	1	88.7	2	88.7	6
		QLDSIVGER									29.3	1	29.3	1																							29.3	1
		SFSTASAITPSVSR	59	1					43.9	1	31.5	1	59	3																							59	3
		SGGGGGGGFGR	48.6	1	38.2	1			68.4	1			68.4	3																			51.3	1	51.3	1	68.4	4
		SLYNLGGSKR																															20.3	1	20.3	1	20.3	1
		TLNNKFASFIDKVR							70.3	2			70.3	2															53.5	1					53.5	1	70.3	3
		TTAENEFVmLKK									42.2	1	42.2	1																							42.2	1
		VLDTKWTLLQEQGTK							22.4	1			22.4	1																							22.4	1
		VRTEEREQIK									24.2	1	24.2	1																							24.2	1
		VSLAGAcGVGGYGSR	85.8	2			41.3	1					85.8	3							57	2			57	2							89.1	2	89.1	2	89.1	7
		WTLLQEQGTK	42.5	1							25.7	1	42.5	2																							42.5	2
		YEDEINKR									19.9	1	19.9	1																							19.9	1
		YEELQQTAGR					52.5	1	44.2	3	34.7	1	52.5	5																							52.5	5
cont82	gi 125080 sp P02533 K1CN HUMAN KERATIN TYPE I CYTOSKELETAL 14 (CYTOKERATIN 14) (K14) (CK 14) gi 2144816 pir KRHUE keratin 50K type I cytoskeletal - human gi 386848 (J00124) keratin [Homo sapiens]	ALEEANADLEVK							55.7	3	55.2	3	55.7	6																			56.5	3	56.5	3	56.5	9
		EVATNSELVQSGK	38.3	1									38.3	1																							38.3	1
		ILNEMRDQYEK																											29	1					29	1	29	1
		ISSVLAGGScR							58.6	3	33.7	1	58.6	4																			64	3	64	3	64	7
[truncated: 107 more rows]
